# Supplementary material for: Targeting the Apoa1 locus for liver-directed gene therapy
Source: PubMed Central journal article supplement — Mol Ther Methods Clin Dev. 2021 Apr 24;21:656–69. doi: 10.1016/j.omtm.2021.04.011 (PMC8166646; doi:10.1016/j.omtm.2021.04.011), 2021-04-24
Supplement: mmc1.pdf [file mmc1.pdf]

**OMTM, Volume 21**

**Supplemental information**

**Targeting the *Apoa1* locus**

**for liver-directed gene therapy**

**Marco De Giorgi, Ang Li, Ayrea Hurley, Mercedes Barzi, Alexandria M. Doerfler, Nikitha A. Cherayil, Harrison E. Smith, Jonathan D. Brown, Charles Y. Lin, Karl-Dimiter Bissig, Gang Bao, and William R. Lagor**

## List and sequence of plasmids used.

1. 1507-pAAV-U6-*Apoal*-gRNA2-SA-HLP-SaCas9-HA-OLLAS-spA 6968 bp
2. 1729-pAAV-*Apoal*-Target-2A-mKate-pA 4924 bp
3. 1730-pAAV-*Apoal*-Target-2A-*APOE*-pA 5158 bp
4. 1731-pAAV-*Apoal*-Target-2A-*FIX*-pA 5590 bp
5. 1771-pAAV-*Apoal*-Target-2A-*FAH*-pA 5470 bp
6. 1161-pAAV-CB-EGFP 5478 bp

### FASTA sequences:

>1507-pAAV-U6-*Apoal*-gRNA2-SA-HLP-SaCas9-HA-OLLAS-spA 6968 bp

```
CAGCTGCGCGCTCGCTCGCTCACTGAGGCCGCCCGGGCAAAGCCCAGGGCGTCGGGC
GACCTTTGGTTCGCCCCGGCCTCAGTGAGCGAGCGAGCGCGCAGAGAGGGGAGTGGCCA
ACTCCATCACTAGGGGTTCTTGTAGTTAATGATTAACCCGCCATGCTACTTATCTAC
GTAGCCATGCTCTGGTGTACAAAAAGCAGGCTTTAAAGGAACCAATTCAGTCGAC
TGGATCCGGTACCAAGGTCGGGCAGGAAGAGGGCCTATTTCCCATGATTCTTCATA
TTTGCATATACGATACAAGGCTGTTAGAGAGATAATTAGAATTAATTTGACTGTAAA
CACAAAGATATTAGTACAAAATACGTGACGTAGAAAGTAATAATTTCTTGGGTAGTT
TGCAGTTTTAAAATTATGTTTTAAAATGGACTATCATATGCTTACCGTAACTTGAAA
GTATTTGATTTCTTGGCTTTATATATCTTGTGGAAAGGACGAAACACCGTTTATTGT
AAGAAAGCCAATGCGTTTTAGTACTCTGGAAACAGAATCTACTAAAACAAGGCAAA
ATGCCGTGTTTATCTCGTCAACTTGTGGCGAGATTTTTTTCTAGAAAGCTTTGTTTG
CTGCTTGCAATGTTTGCCATTTTAGGGTGGACACAGGACGCTGTGGTTTTCTGAGCC
AGGGGGCGACTCAGATCCCAGCCAGTGGACTTAGCCCCTGTTTGCTCCTCCGATAAC
TGGGGTGACCTTGGTTAATATTCACCAGCAGCCTCCCCCGTTGCCCTCTGGATCCA
CTGCTTAAATACGGACGAGGACAGGGCCCTGTCTCCTCAGCTTCAGGCACCACCACT
GACCTGGGACAGTGAATCACCGGTGCCACCATGGCCCCAAAGAAGAAGCGGAAGGT
CGGTATCCACGGAGTCCCAGCAGCCAAGCGGAACTACATCCTGGGCCTGGACATCG
GCATCACCGAGCGTGGGCTACGGCATCATCGACTACGAGACACGGGACGTGATCGAT
GCCGGCGTGCGGCTGTTCAAAGAGGCCAACGTGGAAAACAACGAGGGCAGGCGGA
GCAAGAGAGGGCGCCAGAAGGCTGAAGCGGCGGAGGCGGCATAGAATCCAGAGAGT
GAAGAAGCTGCTGTTGACTACAACCTGCTGACCGACCACAGCGAGCTGAGCGGCA
TCAACCCCTACGAGGCCAGAGTGAAGGGCCTGAGCCAGAAGCTGAGCGAGGAAGA
GTTCTCTGCCGCCCTGCTGCACCTGGCCAAGAGAAGAGGGCGTGACAACGTGAACG
AGGTGGAAGAGGACACCGGCAACGAGCTGTCCACCAAAGAGCAGATCAGCCGGAA
CAGCAAGGCCCTGGAAGAGAAATACGTGGCCGAACTGCAGCTGGAACGGCTGAAG
AAAGACGGCGAAGTGCGGGGCAGCATCAACAGATTCAAGACCAGCGACTACGTGA
AGAAGCCAAACAGCTGCTGAAGGTGCAGAAGGCCTACCACCAGCTGGACCAGAG
CTTCATCGACACCTACATCGACCTGCTGGAAACCCGGCGGACCTACTATGAGGGACC
TGGCGAGGGCAGCCCCCTTCGGCTGGAAGGACATCAAAGAATGGTACGAGATGCTGA
TGGGCCACTGCACCTACTTCCCCGAGGAACTGCGGAGCGTGAAGTACGCCTACAAC
```

GCCGACCTGTACAACGCCCTGAACGACCTGAACAATCTCGTGATCACCAGGGACGA  
GAACGAGAAGCTGGAATATTACGAGAAGTTCCAGATCATCGAGAACGTGTTCAAGC  
AGAAGAAGAAGCCCACCCTGAAGCAGATCGCCAAAGAAATCCTCGTGAACGAAGA  
GGATATTAAGGGCTACAGAGTGACCAGCACCGGCAAGCCGAGTTCACCAACCTGA  
AGGTGTACCACGACATCAAGGACATTACCGCCCGGAAAGAGATTATTGAGAACGCC  
GAGCTGCTGGATCAGATTGCCAAGATCCTGACCATCTACCAGAGCAGCGAGGACAT  
CCAGGAAGAACTGACCAATCTGAACTCCGAGCTGACCCAGGAAGAGATCGAGCAGA  
TCTCTAATCTGAAGGGCTATACCGGCACCCACAACCTGAGCCTGAAGGCCATCAACC  
TGATCCTGGACGAGCTGTGGCACACCAACGACAACCAGATCGCTATCTTCAACCGG  
CTGAAGCTGGTGCCCAAGAAGGTGGACCTGTCCCAGCAGAAAGAGATCCCCACCAC  
CCTGGTGGACGACTTCATCCTGAGCCCCGTCGTGAAGAGAAGCTTCATCCAGAGCAT  
CAAAGTGATCAACGCCATCATCAAGAAGTACGGCCTGCCCAACGACATCATTATCG  
AGCTGGCCCGCGAGAAGAACTCCAAGGACGCCAGAAAATGATCAACGAGATGCA  
GAAGCGGAACCGGCAGACCAACGAGCGGATCGAGGAAATCATCCGGACCACCGGC  
AAAGAGAACGCCAAGTACCTGATCGAGAAGATCAAGCTGCACGACATGCAGGAAG  
GCAAGTGCTGTACAGCCTGGAAGCCATCCCTCTGGAAGATCTGCTGAACAACCCCT  
TCAACTATGAGGTGGACCACATCATCCCCAGAAGCGTGTCTTCGACAACAGCTTCA  
ACAACAAGGTGCTCGTGAAGCAGGAAGAAAACAGCAAGAAGGGCAACCGGACCCC  
ATTCCAGTACCTGAGCAGCAGCGACAGCAAGATCAGCTACGAAACCTTCAAGAAGC  
ACATCCTGAATCTGGCCAAGGGCAAGGGCAGAATCAGCAAGACCAAGAAAGAGTAT  
CTGCTGGAAGAACGGGACATCAACAGGTTCTCCGTGCAGAAAGACTTCATCAACCG  
GAACCTGGTGGATACCAGATACGCCACCAGAGGCCTGATGAACCTGCTGCGGAGCT  
ACTTCAGAGTGAACAACCTGGACGTGAAAGTGAAGTCCATCAATGGCGGCTTCACC  
AGCTTTCTGCGGCGGAAGTGGAAAGTTTAAGAAAGAGCGGAACAAGGGGTACAAGCA  
CCACGCCGAGGACGCCCTGATCATTGCCAACGCCGATTTTCATCTTCAAAGAGTGGAA  
GAAACTGGACAAGGCCAAAAAAGTGATGGAAAACCAGATGTTTCGAGGAAAAGCAG  
GCCGAGAGCATGCCCGAGATCGAAACCGAGCAGGAGTACAAAGAGATCTTCATCAC  
CCCCACCAGATCAAGCACATTAAGGACTTCAAGGACTACAAGTACAGCCACCGGG  
TGGAACAAGAAGCCTAATAGAGAGCTGATTAACGACACCCTGTACTCCACCCGGAAG  
GACGACAAGGGCAACACCCTGATCGTGAACAATCTGAACGGCCTGTACGACAAGGA  
CAATGACAAGCTGAAAAAGCTGATCAACAAGAGCCCCGAAAAGCTGCTGATGTACC  
ACCACGACCCCCAGACCTACCAGAAACTGAAGCTGATTATGGAACAGTACGGCGAC  
GAGAAGAATCCCCTGTACAAGTACTACGAGGAAACCGGGAACCTGACCAAGTA  
CTCCAAAAAGGACAACGGCCCCGTGATCAAGAAGATTAAGTATTACGGCAACAAAC  
TGAACGCCCATCTGGACATCACCGACGACTACCCAACAGCAGAAACAAGGTCGTG  
AAGCTGTCCCTGAAGCCCTACAGATTCGACGTGTACCTGGACAATGGCGTGTACAAG  
TTCGTGACCGTGAAGAATCTGGATGTGATCAAAAAAGAAAACCTACTACGAAGTGAA  
TAGCAAGTGCTATGAGGAAGCTAAGAAGCTGAAGAAGATCAGCAACCAGGCCGAGT  
TTATCGCCTCCTTCTACAACAACGATCTGATCAAGATCAACGGCGAGCTGTATAGAG  
TGATCGGCGTGAACAACGACCTGCTGAACCGGATCGAAGTGAACATGATCGACATC  
ACCTACCGCGAGTACCTGGAAAACATGAACGACAAGAGGCCCCCCCAGGATCATTA  
GACAATCGCCTCCAAGACCCAGAGCATTAAAGAAGTACAGCACAGACATTCTGGGCA  
ACCTGTATGAAGTGAATCTAAGAAGCACCCCTCAGATCATCAAAAAGGGCAAAAGG

CCGGCGGCCACGAAAAAGGCCGGCCAGGCCAAAAAAGAAAAAGGGATCCTACCCAT  
ACGATGTTCCAGATTACGCTAGCGGCTTCGCCAACGAGCTTGGACCCAGGTTGATGG  
GAAAGTAAGAATTCCTAGAGCGAATAAAAGATCTTTATTTTCATTAGATCTGTGTGT  
TGGTTTTTTGTGTGATGCAGCTACGTAGATAAGTAGCATGGCCGGGTTAATCATTAAAC  
TACAAGGAACCCCTAGTGATGGAGTTGGCCACTCCCTCTCTGCGCGCTCGCTCGCTC  
ACTGAGGCCGGGCGACCAAAGGTCGCCCCGACGCCCGGGCTTTGCCCGGGCGGCCTC  
AGTGAGCGAGCGAGCGCGCAGCTGCATTAATGAATCGGCCAACGCGCGGGGAGAG  
GCGGTTTTGCGTATTGGGCGCTCTTCCGCTTCCTCGCTCACTGACTCGCTGCGCTCGGT  
CGTTCGGCTGCGGCAGCGGTATCAGCTCACTCAAAGGCGGTAATACGGTTATCCAC  
AGAATCAGGGGATAACGCAGGAAAGAACATGTGAGCAAACCAGCAAAAAGGCC  
AGGAACCGTAAAAAGGCCGCGTTGCTGGCGTTTTTCCATAGGCTCCGCCCCCTGAC  
GAGCATCACAAAATCGACGCTCAAGTCAGAGGTGGCGAAACCCGACAGGACTATA  
AAGATACCAGGCGTTTCCCCCTGGAAGCTCCCTCGTGCGCTCTCTGTTCCGACCCT  
GCCGCTTACCGGATACCTGTCCGCCTTTCTCCCTTCGGGAAGCGTGGCGCTTTCTCAT  
AGCTCACGCTGTAGGTATCTCAGTTCGGTGTAGGTCGTTTCGCTCCAAGCTGGGCTGT  
GTGCACGAACCCCGTTCAGCCCGACCGCTGCGCCTTATCCGGTAACTATCGTCTT  
GAGTCCAACCCGGTAAGACACGACTTATCGCCACTGGCAGCAGCCACTGGTAACAG  
GATTAGCAGAGCGAGGTATGTAGGCGGTGCTACAGAGTTCTTGAAGTGGTGGCCTA  
ACTACGGCTACACTAGAAGGACAGTATTTGGTATCTGCGCTCTGCTGAAGCCAGTTA  
CCTTCGGAAAAAGAGTTGGTAGCTCTTGATCCGGCAAACAAACCACCGCTGGTAGC  
GGTGGTTTTTTTTGTTTGCAAGCAGCAGATTACGCGCAGAAAAAAAGGATCTCAAGA  
AGATCCTTTGATCTTTTCTACGGGGTCTGACGCTCAGTGGAACGAAAACACTCACGTTA  
AGGGATTTTGGTCATGAGATTATCAAAAAGGATCTTCACCTAGATCCTTTTAAATTA  
AAAATGAAGTTTTAAATCAATCTAAAGTATATATGAGTAAACTTGGTCTGACAGTTA  
CCAATGCTTAATCAGTGAGGCACCTATCTCAGCGATCTGTCTATTTTCGTTTCATCCATA  
GTTGCCTGACTCCCCGTCGTGTAGATAACTACGATACGGGAGGGCTTACCATCTGGC  
CCCAGTGCTGCAATGATACCGCGAGACCCACGCTCACCGGCTCCAGATTTATCAGCA  
ATAAACCAGCCAGCCGGAAGGGCCGAGCGCAGAAGTGGTCCTGCAACTTTATCCGC  
CTCCATCCAGTCTATTAATTGTTGCCGGGAAGCTAGAGTAAGTAGTTCGCCAGTTAA  
TAGTTTGCGCAACGTTGTTACCATTACTACAGGCATCGTGGTGTACGCTCGTCGTTT  
GGTATGGCTTCATTCAGCTCCGGTTCCCAACGATCAAGGCGAGTTACATGATCCCCC  
ATGTTGTGCAAAAAAGCGGTTAGCTCCTTCGGTCCTCCGATCGTTGTCAGAAGTAAG  
TTGGCCGCAGTGTTATCACTCATGGTTATGGCAGCACTGCATAATTCTCTTACTGTCA  
TGCCATCCGTAAGATGCTTTTCTGTGACTGGTGAGTACTCAACCAAGTCATTCTGAG  
AATAGTGTATGCGGCGACCGAGTTGCTCTTGCCCCGGCGTCAATACGGGATAATACCG  
CGCCACATAGCAGAACTTTAAAAGTGCTCATCATTGGAAAACGTTCTTCGGGGCGAA  
AACTCTCAAGGATCTTACCACTATTGAGATCCAGTTCGATGTAACCCACTCGTGCAC  
CCAATGATCTTCAGCATCTTTTACTTTACCAGCGTTTCTGGGTGAGCAAAAACAG  
GAAGGCAAAATGCCGCAAAAAGGGGAATAAGGGCGACACGGAAATGTTGAATACT  
CATACTCTTCCTTTTTCAATATTATTGAAGCATTATCAGGGTTATTGTCTCATGAGC  
GGATACATATTTGAATGTATTTAGAAAAATAAACAATAAGGGGTTCCGCGCACATTT  
CCCCGAAAGATGCCACCTGAAATTATAAACGTTAATATTTTGTAAAATTCGCGTTA  
AATTTTTGTAAATCAGCTCATTTTTTAACCAATAGGCCGAAATCGGAAAAATCCCT

TATAAATCAAAGAATAGACCGAGATAGGGTTGAGTGTGTTCCAGTTTGGAAACAA  
GAGTCCACTATTGAGGAACGTGAACTCCAGCGTCAAAGGGCGAAAAACCGTCTATC  
GGGGCGATGGCCACTACGTGAACCATCACCTAATCAAGTTTTTTGGGGTCGAGGT  
GCCGTAAAGCACTAAATCGGAACCCTAAAGGGAGCCCCGATTTAGAGCTTGACGG  
GGAAAGCCGGCGAACGTGGCGAGAAAGGAAGGGAAAGAAAGCGAAAGGAGCGGGC  
GCTAGGGCGCTGGCAAGTGTAGCGGTACGCTGCGCGTAACCACCACACCCGCCGC  
GCTTAATGCGCCGCTACAGGGCGCGTCCCATTCCGCATTCAGGCTGCGCAACTGTTG  
GGAAGGGCGATCGGTGCGGGCCTCTTCGCTATTACGC

>1729-pAAV-*Apoa1*-Target-2A-mKate-pA 4924 bp

CAGCTGCGCGCTCGCTCGCTCACTGAGGCCGCCGGGCAAAGCCCCGGGCGTCGGGC  
GACCTTTGGTCGCCCGCCTCAGTGAGCGAGCGAGCGCGCAGAGAGGGGAGTGGCCA  
ACTCCATCACTAGGGGTTCTTGTAGTTAATGATTAACCCGCCATGCTACTTATCTAC  
GTAGCCATGCTCTGGAAAGCTTCATTAGGGGACAGGTGGCACCCAGCTATCATGTGC  
ATGGATCTGCAGACCAGGGGCAGCGCATGATGCCTGGGCTCGTCTCTCAGCCGCTCT  
CTCCCCCTCTAGCCTGAATCTCCTGGAAAACCTGGGACACTCTGGGTTCAACCGTTA  
GTCAGCTGCAGGAACGGCTGGGCCATTGACTCGGGACTTCTGGGATAACCTGGAG  
AAAGAAACAGATTGGGTGAGACAGGAGATGAACAAGGACCTAGAGGAAGTGAAAC  
AGAAGGTGCAGCCCTACCTGGACGAATTCCAGAAGAAATGGAAAGAGGATGTGGA  
GCTCTACCGCCAGAAGGTGGCGCCTCTGGGCGCCGAGCTGCAGGAGAGCGCGCGCC  
AGAAGCTGCAGGAGCTGCAAGGGAGACTGTCCCCTGTGGCTGAGGAATTTTCGCGAC  
CGCATGCGCACACACGTAGACTCTCTGCGCACACAGCTAGCGCCCCACAGCGAACA  
GATGCGCGAGAGCCTGGCCCAGCGCCTGGCTGAGCTCAAGAGCAACCCTACCTTGA  
ACGAGTACCACACCAGGGCCAAAACCCACCTGAAGACACTTGGCGAGAAAGCCAG  
ACCTGCGCTGGAGGACCTGCGCCATAGTCTGATGCCCATGCTGGAGACGCTTAAGA  
CCCAAGTCCAGAGTGTGATCGACAAGGCCAGCGAGACTCTGACTGCCCAGTCTAGA  
GGAAGCGGAGCCACTAACTTCTCCCTGTTGAAACAAGCAGGGGATGTCTGAAGAGAA  
TCCCGGGCCAGTGAGCGAGCTGATTAAGGAGAACATGCACATGAAGCTGTACATGG  
AGGGCACCGTGAACAACCACCACTTCAAGTGCACATCCGAGGGCGAAGGCAAGCCC  
TACGAGGGCACCCAGACCATGAGAATCAAGGCGGTTCGAGGGCGGCCCTCTCCCCTT  
CGCCTTCGACATCCTGGCTACCAGCTTCATGTACGGCAGCAAAACCTTCATCAACCA  
CACCCAGGGCATCCCCGACTTCTTTAAGCAGTCCTTCCCCGAGGGCTTCACATGGGA  
GAGAGTACCACATAACGAAGACGGGGGCGTGCTGACCGCTACCCAGGACACCAGCC  
TCCAGGACGGCTGCCTCATCTACAACGTCAAGATCAGAGGGGTGAACTTCCCATCCA  
ACGGCCCTGTGATGCAGAAGAAAACACTCGGCTGGGAGGCCTCCACCGAGACCCTG  
TACCCCGCTGACGGCGGCCTGGAAGGCAGAGCCGACATGGCCCTGAAGCTCGTGGG  
CGGGGGCCACCTGATCTGCAACTTGAAGACCACATACAGATCCAAGAAACCCGCTA  
AGAACCTCAAGATGCCCGGCGTCTACTATGTGGACAGAAGACTGGAAAGAATCAAG  
GAGGCCGACAAAGAGACCTACGTCGAGCAGCACGAGGTGGCTGTGGCCAGATACTG  
CGACCTCCCTAGCAAACCTGGGGCACAGAGATTACAAGGATGACGATGACAAGTGAA  
CCGGTTCGCGAATAAAAGATCTTTATTTTCATTAGATCTGTGTGTTGGTTTTTTGTGT

GATGCAGCGGTACCCTTCTTTCTTTGGGGGACATAGGGCGGGCGCTAAGGGGACATC  
AAGGGACGTGAGAACATGGTGCCGCACTGGGGATTCTTTGTACGCGACTACTCAG  
CTCTTAACGCTCACTCAAGCTGGGCACCTGGCTGGTTCAGGGTATGAGACAGAATCC  
CTTCTAAGAAGGCTCCAAGGGAAATGGATGGCCAGGCCAAAGCAACAAGGAACCC  
AAAAGGGCCCCACAGAGGCTCAGAACACTAGTGCTGTAAACCAGGATGAGAGTGTC  
TGGCAATAGGACTGGCTTTGAGACCGCTGGTTTCTTGTGCTAGCCGAGTTTCCAGGT  
GGGGTCCAGAGGGTGCAGGACGGGAGCCTCTTCCACTCCCTAGAGCCAGGATTCT  
TCAGGAGCCAGGAAGATTGGAGTTATTGGGTGGGTGCTAATAAAAAGCCTGGAGCT  
GAACCCGATCTCGGTAAACAATTCCCTTTGATCTTTCCCTCCGACGCGTTACGTAGAT  
AAGTAGCATGGCGGGTTAATCATTAACTACAAGGAACCCCTAGTGATGGAGTTGGC  
CACTCCCTCTCTGCGCGCTCGCTCGCTCACTGAGGCCGGGCGACCAAAGGTCGCCCC  
ACGCCCGGGCTTTGCCCGGGCGGCCTCAGTGAGCGAGCGAGCGCGCAGCTGCATTA  
ATGAATCGGCCAACGCGCGGGGAGAGGCGGTTTGCATATTGGGCGCTCTTCCGCTTC  
CTCGCTCACTGACTCGCTGCGCTCGGTCGTTTCGGCTGCGGCGAGCGGTATCAGCTCA  
CTCAAAGGCGGTAATACGGTTATCCACAGAATCAGGGGATAACGCAGGAAAGAACA  
TGTGAGCAAACCCGACAGGACTATAAAGATAACCAGGCGTTTCCCCCTGGAAGCT  
GTTTTTCCATAGGCTCCGCCCCCTGACGAGCATCACAAAATCGACGCTCAAGTCA  
GAGGTGGCGAAACCCGACAGGACTATAAAGATAACCAGGCGTTTCCCCCTGGAAGCT  
CCCTCGTGCGCTCTCCTGTTCCGACCCTGCCGCTTACCGGATACCTGTCCGCCTTCT  
CCCTTCGGGAAGCGTGGCGCTTTCTCATAGCTCACGCTGTAGGTATCTCAGTTCGGT  
GTAGGTCGTTTCGCTCCAAGCTGGGCTGTGTGCACGAACCCCCCGTTCAGCCCGACCG  
CTGCGCCTTATCCGGTAACTATCGTCTTGAGTCCAACCCGGTAAGACACGACTTATC  
GCCACTGGCAGCAGCCACTGGTAACAGGATTAGCAGAGCGAGGTATGTAGGCGGTG  
CTACAGAGTTCTTGAAGTGGTGGCCTAACTACGGCTACACTAGAAGGACAGTATTTG  
GTATCTGCGCTCTGCTGAAGCCAGTTACCTTCGGAAAAAGAGTTGGTAGCTCTTGAT  
CCGGCAAACAAACCACCGCTGGTAGCGGTGGTTTTTTTTGTTTGCAAGCAGCAGATTA  
CGCGCAGAAAAAAGGATCTCAAGAAGATCCTTTGATCTTTTCTACGGGGTCTGACG  
CTCAGTGGAAACGAAAACCTCACGTTAAGGGATTTTGGTTCATGAGATTATCAAAAAGG  
ATCTTCACCTAGATCCTTTTAAATTA AAAATGAAGTTTTAAATCAATCTAAAGTATAT  
ATGAGTAAACTTGGTCTGACAGTTACCAATGCTTAATCAGTGAGGCACCTATCTCAG  
CGATCTGTCTATTTTCGTTTCATCCATAGTTGCCTGACTCCCCGTCGTGTAGATAACTAC  
GATACGGGAGGGCTTACCATCTGGCCCCAGTGCTGCAATGATACCGCGAGACCCAC  
GCTCACCGGCTCCAGATTTATCAGCAATAAACCAGCCAGCCGGAAGGGCCGAGCGC  
AGAAGTGGTCCTGCAACTTTATCCGCTCCATCCAGTCTATTAATTGTTGCCGGGAA  
GCTAGAGTAAGTAGTTCGCCAGTTAATAGTTTGCGCAACGTTGTTACCATTACTACA  
GGCATCGTGGTGTACGCTCGTCGTTTGGTATGGCTTCATTACGCTCCGGTTCCCAAC  
GATCAAGGCGAGTTACATGATCCCCCATGTTGTGCAAAAAAGCGGTTAGCTCCTTCCG  
GTCCTCCGATCGTTGTCAGAAGTAAGTTGGCCGACAGTGTTATCACTCATGGTTATGG  
CAGCACTGCATAATTCTCTTACTGTCATGCCATCCGTAAGATGCTTTTCTGTGACTGG  
TGAGTACTCAACCAAGTCATTCTGAGAATAGTGTATGCGGCGACCGAGTTGCTCTTG  
CCCGGCGTCAATACGGGATAATACCGCGCCACATAGCAGA ACTTTAAAAGTGCTCA  
TCATTGGAACGTTCTTCGGGGCGAAAACCTCTCAAGGATCTTACCACTATTGAGAT  
CCAGTTCGATGTAACCCACTCGTGCACCCA ACTGATCTTCAGCATCTTTTACTTTCAC

CAGCGTTTCTGGGTGAGCAAAAACAGGAAGGCAAAATGCCGCAAAAAGGGAATA  
AGGGCGACACGGAAATGTTGAATACTCATACTCTTCCTTTTTCAATATTATTGAAGC  
ATTTATCAGGGTTATTGTCTCATGAGCGGATACATATTTGAATGTATTTAGAAAAAT  
AAACAAATAGGGGTTCGCGCACATTTCCCGAAAGATGCCACCTGAAATTATAAA  
CGTTAATATTTTGTAAAATTCGCGTTAAATTTTTGTAAATCAGCTCATTTTTTAAC  
CAATAGGCCGAAATCGGAAAAATCCCTTATAAATCAAAGAATAGACCGAGATAGG  
GTTGAGTGTTGTTCCAGTTTGAACAAGAGTCCACTATTGAGGAACGTGAACTCCAG  
CGTCAAAGGGCGAAAAACCGTCTATCGGGGCGATGGCCACTACGTGAACCATCAC  
CCTAATCAAGTTTTTTGGGGTCGAGGTGCCGTAAAGCACTAAATCGGAACCCTAAAG  
GGAGCCCCGATTTAGAGCTTGACGGGGAAAGCCGGCGAACGTGGCGAGAAAGGA  
AGGGAAGAAAGCGAAAGGAGCGGGCGCTAGGGCGCTGGCAAGTGTAGCGGTCACG  
CTGCGCGTAACCACCACACCCGCCGCGCTTAATGCGCCGCTACAGGGGCGCGTCCCAT  
TCGCCATTAGGCTGCGCAACTGTTGGGAAGGGCGATCGGTGCGGGCCTCTTCGCTA  
TTACGC

>1730-pAAV-*Apoa1*-Target-2A-*APOE*-pA 5158 bp

CAGCTGCGCGCTCGCTCGCTCACTGAGGCCGCCGGGCAAAGCCCGGGCGTCGGGC  
GACCTTTGGTCGCCCGCCTCAGTGAGCGAGCGAGCGCGCAGAGAGGGAGTGGCCA  
ACTCCATCACTAGGGGTTCTTGTAGTTAATGATTAACCCGCCATGCTACTTATCTAC  
GTAGCCATGCTCTGGAAAGCTTCATTAGGGGACAGGTGGCACCCAGCTATCATGTGC  
ATGGATCTGCAGACCAGGGGCAGCGCATGATGCCTGGGCTCGTCTCTCAGCCGCTCT  
CTTCCCCCTCTAGCCTGAATCTCCTGGAAAACCTGGGACACTCTGGGTTC AACCGTTA  
GTCAGCTGCAGGAACGGCTGGGCCATTGACTCGGGACTTCTGGGATAACCTGGAG  
AAAGAAACAGATTGGGTGAGACAGGAGATGAACAAGGACCTAGAGGAAGTGA AAC  
AGAAGGTGCAGCCCTACCTGGACGAATTCCAGAAGAAATGGAAAGAGGATGTGGA  
GCTCTACCGCCAGAAGGTGGCGCCTCTGGGCGCCGAGCTGCAGGAGAGCGCGCGCC  
AGAAGCTGCAGGAGCTGCAAGGGAGACTGTCCCCTGTGGCTGAGGAATTTGCGGAC  
CGCATGCGCACACACGTAGACTCTCTGCGCACACAGCTAGCGCCCCACAGCGAAC A  
GATGCGCGAGAGCCTGGCCAGCGCCTGGCTGAGCTCAAGAGCAACCCTACCTTGA  
ACGAGTACCACACCAGGGCCAAAACCCACCTGAAGACACTTGGCGAGAAAGCCAG  
ACCTGCGCTGGAGGACCTGCGCCATAGTCTGATGCCCATGCTGGAGACGCTTAAGA  
CCCAAGTCCAGAGTGTGATCGACAAGGCCAGCGAGACTCTGACTGCCCAGTCTAGA  
GGAAGCGGAGCCACTA ACTTCTCCCTGTTGAAACAAGCAGGGGATGTGGAAGAGAA  
TCCCGGGCCAATGAAGGTTCTGTGGGCTGCGTTGCTGGTCACATTCCTGGCAGGATG  
CCAGGCCAAGGTGGAGCAAGCGGTGGAGACAGAGCCGGAGCCCGAGCTGCGCCAG  
CAGACCGAGTGGCAGAGCGGCCAGCGCTGGGAACTGGCACTGGGTGCTTTTTGGGA  
TTACCTGCGCTGGGTGCGACACTGTCTGAGCAGGTGCAGGAGGAGCTGCTCAGCTC  
CCAGGTCACCCAGGAACTGAGGGCGCTGATGGACGAGACCATGAAGGAGTTGAAGG  
CCTACAAATCGGAACTGGAGGAACA ACTGACCCCGGTGGCGGAGGAGACGCGGGC  
ACGGCTGTCCAAGGAGCTGCAGGCGGCGCAGGCCCGGCTGGGCGCGGACATGGAG  
GACGTGTGCGGCCGCCTGGTGCAGTACCGCGGCGAGGTGCAGGCCATGCTCGGCCA

GAGCACCGAGGAGCTGCGGGTGCGCCTCGCCTCCCACCTGCGCAAGCTGCGTAAGC  
GGCTCCTCCGCGATGCCGATGACCTGCAGAAGCGCCTGGCAGTGTACCAGGCCGGG  
GCCCCGAGGGCGCCGAGCGCGGCCTCAGCGCCATCCGCGAGCGCCTGGGGCCCCT  
GGTGAACAGGGCCGCGTGCGGGGCCCACTGTGGGCTCCCTGGCCGGCCAGCCGC  
TACAGGAGCGGGCCCAGGCCTGGGGCGAGCGGCTGCGCGCGCGGATGGAGGAGAT  
GGGCAGCCGGACCCGCGACCCGCCTGGACGAGGTGAAGGAGCAGGTGGCGGAGGTG  
CGCGCCAAGCTGGAGGAGCAGGCCAGCAGATACGCCTGCAGGCCGAGGCCTTCCA  
GGCCCCGCTCAAGAGCTGGTTTCGAGCCCCTGGTGGAAAGACATGCAGCGCCAGTGGG  
CCGGGCTGGTGGAGAAGGTGCAGGCTGCCGTGGGCACCAGCGCCGCCCTGTGCC  
AGCGACAATCACTGAACCGGTTTCGCGAATAAAAGATCTTTATTTTCATTAGATCTGT  
GTGTTGGTTTTTTGTGTGATGCAGCGGTACCCTTCTTTCTTTGGGGGACATAGGGCGG  
GCGCTAAGGGGACATCAAGGGACGTGAGAACATGGTGCCGCACTGGGGATTCCCTT  
GTACGCGACTACTCAGCTCTTAACGCTCACTCAAGCTGGGCACCTGGCTGGTTCAGG  
GTATGAGACAGAATCCCTTCCTAAGAAGGCTCCAAGGGAAATGGATGGCCAGGCCAA  
AGCAACAAGGAACCCCAAAGGGCCCCACAGAGGCTCAGAACACTAGTGCTGTAA  
ACCAGGATGAGAGTGTCTGGCAATAGGACTGGCTTTGAGACCGCTGGTTTCTTGTGC  
TAGCCGAGTTTCCAGGTGGGGTCCAGAGGGTGCAGGACGGGAGCCTCTTCCACTCC  
CTAGAGCCAGGATTCCCTCAGGAGCCAGGAAGATTGGAGTTATTGGGTGGGTGCTA  
ATAAAAAGCCTGGAGCTGAACCCGATCTCGGTAAACAATTCCCTTTGATCTTTCCT  
CCGACGCGTTACGTAGATAAGTAGCATGGCGGGTTAATCATTAACTACAAGGAACC  
CCTAGTGATGGAGTTGGCCACTCCCTCTCTGCGCGCTCGCTCGCTCACTGAGGCCGG  
GCGACCAAAGGTCGCCCGACGCCGGGCTTTGCCCGGGCGGCCTCAGTGAGCGAGC  
GAGCGCGCAGCTGCATTAATGAATCGGCCAACGCGCGGGGAGAGGCGGTTTTCGTA  
TTGGGCGCTCTTCCGCTTCTCGCTCACTGACTCGCTGCGCTCGGTTCGTTCCGGCTGCG  
GCGAGCGGTATCAGCTCACTCAAAGGCGGTAATACGGTTATCCACAGAATCAGGGG  
ATAACGCAGGAAAGAACATGTGAGCAAAACCGCAGCAAAAGGCCAGGAACCGTAA  
AAAGGCCGCGTTGCTGGCGTTTTTCCATAGGCTCCGCCCCCTGACGAGCATCACAA  
AAATCGACGCTCAAGTCAGAGGTGGCGAAACCCGACAGGACTATAAAGATAACCAGG  
CGTTTCCCCCTGGAAGCTCCCTCGTGCGCTCTCCTGTTCCGACCCTGCCGCTTACCGG  
ATACCTGTCCGCTTTTCTCCCTTCGGGAAGCGTGGCGCTTTCTCATAGCTCACGCTGT  
AGGTATCTCAGTTCGGTGTAGGTCGTTTCGCTCCAAGCTGGGCTGTGTGCACGAACCC  
CCCGTTCAGCCCGACCGCTGCGCCTTATCCGGTAACTATCGTCTTGAGTCCAACCCG  
GTAAGACACGACTTATCGCCACTGGCAGCAGCCACTGGTAACAGGATTAGCAGAGC  
GAGGTATGTAGGCGGTGCTACAGAGTTCTTGAAGTGGTGGCCTAACTACGGCTACAC  
TAGAAGGACAGTATTTGGTATCTGCGCTCTGCTGAAGCCAGTTACCTTCGGAAAAAG  
AGTTGGTAGCTCTTGATCCGGCAAACAACCACCGCTGGTAGCGGTGGTTTTTTTTGT  
TTGCAAGCAGCAGATTACGCGCAGAAAAAAGGATCTCAAGAAGATCCTTTGATCT  
TTTCTACGGGGTCTGACGCTCAGTGGAACGAAAACCTCACGTTAAGGGATTTTGGTCA  
TGAGATTATCAAAAAGGATCTTCACCTAGATCCTTTTAAATTAATAAATGAAGTTTAA  
AATCAATCTAAAGTATATATGAGTAAACTTGGTCTGACAGTTACCAATGCTTAATCA  
GTGAGGCACCTATCTCAGCGATCTGTCTATTTTCGTTTCATCCATAGTTGCCTGACTCCC  
CGTCGTGTAGATAACTACGATACGGGAGGGCTTACCATCTGGCCCCAGTGCTGCAAT  
GATACCGCGAGACCCACGCTCACCGGCTCCAGATTTATCAGCAATAAACCAGCCAG



CCGGAAGGGCCGAGCGCAGAAGTGGTCCTGCAACTTTATCCGCCTCCATCCAGTCTA  
TTAATTGTTGCCGGAAGCTAGAGTAAGTAGTTCGCCAGTTAATAGTTTTCGCAACG  
TTGTTACCATTACTACAGGCATCGTGGTGTACGCTCGTCGTTTGGTATGGCTTCATT  
CAGCTCCGGTTCCCAACGATCAAGGCGAGTTACATGATCCCCATGTTGTGCAAAAA  
AGCGGTTAGCTCCTTCGGTCCTCCGATCGTTGTCAGAAGTAAGTTGGCCGAGTGTT  
ATCACTCATGGTTATGGCAGCACTGCATAATTCTCTTACTGTCATGCCATCCGTAAG  
ATGCTTTTCTGTGACTGGTGAGTACTCAACCAAGTCATTCTGAGAATAGTGTATGCG  
GCGACCGAGTTGCTCTTGCCCGGCGTCAATACGGGATAATACCGCGCCACATAGCA  
GAACTTTAAAAGTGCTCATCATTGGAAAACGTTCTTCGGGGCGAAAACCTCTCAAGGA  
TCTTACCCTATTGAGATCCAGTTCGATGTAACCCACTCGTGCACCCAACTGATCTTC  
AGCATCTTTTACTTTCACCAGCGTTTCTGGGTGAGCAAAAACAGGAAGGCAAAATGC  
CGCAAAAAGGGAATAAGGGCGACACGGAAATGTTGAATACTCATACTCTTCCTTTT  
TCAATATTATTGAAGCATTATCAGGGTTATTGTCTCATGAGCGGATACATATTTGA  
ATGTATTTAGAAAAATAAACAAATAGGGGTTCCGCGCACATTTCCCCGAAAGATGC  
CACCTGAAATTATAAACGTTAATATTTTGTAAAATTCGCGTTAAATTTTGTAAAT  
CAGCTCATTTTTTAACCAATAGGCCGAAATCGGAAAAATCCCTTATAAATCAAAGA  
ATAGACCGAGATAGGGTTGAGTGTGTTCCAGTTTGAACAAGAGTCCACTATTGAG  
GAACGTGAACTCCAGCGTCAAAGGGCGAAAAACCGTCTATCGGGGCGATGGCCAC  
TACGTGAACCATCACCTAATCAAGTTTTTTGGGGTCGAGGTGCCGTAAAGCACTAA  
ATCGGAACCCTAAAGGGAGCCCCGATTTAGAGCTTGACGGGGAAAGCCGGCGAAC  
GTGGCGAGAAAGGAAGGGAAGAAAGCGAAAGGAGCGGGCGCTAGGGCGCTGGCAA  
GTGTAGCGGTCACGCTGCGCGTAACCACCACACCCGCCGCGCTTAATGCGCCGCTAC  
AGGGCGCGTCCCATTCCGCAATCAGGCTGCGCAACTGTTGGGAAGGGCGATCGGTG  
CGGGCCTCTTCGCTATTACGC

>1731-pAAV-*Apoal*-Target-2A-*FIX*-pA 5590 bp

CAGCTGCGCGCTCGCTCGCTCACTGAGGCCGCCCGGGCAAAGCCCAGGGCGTCGGGC  
GACCTTTGGTGCCCCGGCCTCAGTGAGCGAGCGAGCGCGCAGAGAGGGAGTGCCCA  
ACTCCATCACTAGGGGTTCCCTGTAGTTAATGATTAACCCGCCATGCTACTTATCTAC  
GTAGCCATGCTCTGGAAAGCTTCATTAGGGGACAGGTGGCACCCAGCTATCATGTGC  
ATGGATCTGCAGACCAGGGGCAGCGCATGATGCCTGGGCTCGTCTCTCAGCCGCTCT  
CTTCCCCCTTAGCCTGAATCTCCTGGAAAACCTGGGACACTCTGGGTTCAACCGTTA  
GTCAGCTGCAGGAACGGCTGGGCCCATTGACTCGGGACTTCTGGGATAACCTGGAG  
AAAGAAACAGATTGGGTGAGACAGGAGATGAACAAGGACCTAGAGGAAGTGAAAC  
AGAAGGTGCAGCCCTACCTGGACGAATTCCAGAAGAAATGGAAAGAGGATGTGGA  
GCTCTACCGCCAGAAGGTGGCGCCTCTGGGCGCCGAGCTGCAGGAGAGCGCGCGCC  
AGAAGCTGCAGGAGCTGCAAGGGGAGACTGTCCCCTGTGGCTGAGGAATTTTCGCGAC  
CGCATGCGCACACACGTAGACTCTCTGCGCACACAGCTAGCGCCCCACAGCGAACA  
GATGCGCGAGAGCCTGGCCAGCGCCTGGCTGAGCTCAAGAGCAACCCTACCTTGA  
ACGAGTACCACACCAGGGCCAAAACCCACCTGAAGACACTTGGCGAGAAAGCCAG  
ACCTGCGCTGGAGGACCTGCGCCATAGTCTGATGCCCATGCTGGAGACGCTTAAGA

CCCAAGTCCAGAGTGTGATCGACAAGGCCAGCGAGACTCTGACTGCCAGTCTAGA  
GGAAGCGGAGCCACTAACTTCTCCCTGTTGAAACAAGCAGGGGATGTCTGAAGAGAA  
TCCCGGGCCAATGCAGCGCGTGAACATGATCATGGCAGAATCACCAGGCCTCATCA  
CCATCTGCCTTTTAGGATATCTACTCAGTGCTGAATGTACAGTTTTTCTTGATCATGA  
AAACGCCAACAAAATTCTGAATCGGCCAAAGAGGTATAATTCAGGTAAATTGGAAG  
AGTTTGTTC AAGGGAACCTTGAGAGAGAATGTATGGAAGAAAAGTGTAGTTTTGAA  
GAAGCACGAGAAGTTTTTGA AACACTGAAAGAACA ACTGAATTTTGAAGCAGTA  
TGTTGATGGAGATCAGTGTGAGTCCAATCCATGTTTAAATGGCGGCAGTTGCAAGGA  
TGACATTAATTCCTATGAATGTTGGTGTCCCTTTGGATTTGAAGGAAAGA ACTGTGA  
ATTAGATGTAACATGTAACATTAAGAATGGCAGATGCGAGCAGTTTTGTAAAAATA  
GTGCTGATAACAAGGTGGTTTGCTCCTGTACTGAGGGATATCGACTTGCAGAAAACC  
AGAAGTCCTGTGAACCAGCAGTGCCATTTCCATGTGGAAGAGTTTCTGTTTCACAAA  
CTTCTAAGCTCACCCGTGCTGAGACTGTTTTTCTGATGTGGACTATGTAAATTCTAC  
TGAAGCTGAAACCATTTTGGATAACATCACTCAAAGCACCCAATCATTTAATGACTT  
CACTCGGGTTGTTGGTGGAGAAGATGCCAAACCAGGTCAATTCCTTGGCAGGTTGT  
TTTGAATGGTAAAGTTGATGCATTCTGTGGAGGCTCTATCGTTAATGAAAATGGAT  
TGTA ACTGCTGCCACTGTGTTGAAACTGGTGTAAAATTACAGTTGTTCGCAGGTGA  
ACATAATATTGAGGAGACAGAACATACAGAGCAAAGCGAAATGTGATTCTGAATTA  
TTCCTCACCACA ACTACAATGCAGCTATTAATAAGTACAACCATGACATTGCCCTTC  
TGGA ACTGGACGAACCCTTAGTGCTAAACAGCTACGTTACACCTATTTGCATTGCTG  
ACAAGGAATACACGAACATCTTCCTCAAATTTGGATCTGGCTATGTAAGTGGCTGGG  
GAAGAGTCTTCCACAAAGGGAGATCAGCTTTAGTTCTTCAGTACCTTAGAGTTCCAC  
TTGTTGACCGAGCCACATGTCTTCGATCTACAAAGTTCACCATCTATAACAACATGT  
TCTGTGCTGGCTTCCATGAAGGAGGTAGAGATTCATGTCAAGGAGATAGTGGGGGA  
CCCCATGTTACTGAAGTGGAAAGGGACCAGTTTCTTAACTGGAATTATTAGCTGGGGT  
GAAGAGTGTGCAATGAAAGGCAAATATGGAATATATACCAAGGTATCCCGGTATGT  
CAACTGGATTAAGGAAAAACAAGCTCACTTAAACCGGTTTCGCGAATAAAAAGATC  
TTTATTTTCATTAGATCTGTGTGTTGGTTTTTTGTGTGATGCAGCGGTACCCTTCTTC  
TTTGGGGGACATAGGGCGGGCGCTAAGGGGACATCAAGGGACGTGAGAACATGGTG  
CCGCACTGGGGATTCCTTTGTACGCGACTACTCAGCTCTTAAACGCTCACTCAAGCTG  
GGCACCTGGCTGGTTCAGGGTATGAGACAGAATCCCTTCCTAAGAAGGCTCCAAGG  
GAAATGGATGGCCAGGCAAAGCAAACAAGGAACCCCAAAAAGGGCCCCACAGAGGCT  
CAGAACACTAGTGCTGTAAACCAGGATGAGAGTGTCTGGCAATAGGACTGGCTTTG  
AGACCGCTGGTTTTCTTGTGCTAGCCGAGTTTCCAGGTGGGGTCCAGAGGGTGCAGGA  
CGGGAGCCTCTTCCACTCCCTAGAGCCAGGATTCCTTCAGGAGCCAGGAAGATTGG  
AGTTATTGGGTGGGTGCTAATAAAAAGCCTGGAGCTGAACCCGATCTCGGTAAACA  
ATTCCTTTGATCTTTCCCTCCGACGCGTTACGTAGATAAGTAGCATGGCGGGTTAAT  
CATTAACTACAAGGAACCCCTAGTGATGGAGTTGGCCACTCCCTCTCTGCGCGCTCG  
CTCGCTCACTGAGGCCGGGGCGACCAAAGGTCGCCCGACGCCCGGGCTTTGCCCGGG  
CGGCCTCAGTGAGCGAGCGAGCGCAGCTGCATTAATGAATCGGCCAACGCGCGG  
GGAGAGGCGGTTTGCATATTGGGCGCTCTTCCGCTTCCTCGCTCACTGACTCGCTGC  
GCTCGGTCGTTCCGGCTGCGGCGAGCGGTATCAGCTCACTCAAAGGCGGTAATACGGT  
TATCCACAGAATCAGGGGATAACGCAGGAAAGAACATGTGAGCAAACCGCAGCA

AAAGGCCAGGAACCGTAAAAAGGCCGCGTTGCTGGCGTTTTTCCATAGGCTCCGCC  
CCCCTGACGAGCATCACAAAATCGACGCTCAAGTCAGAGGTGGCGAAACCCGACA  
GGACTATAAAGATACCAGGCGTTTCCCCCTGGAAGCTCCCTCGTGCGCTCTCCTGTT  
CCGACCCTGCCGCTTACCGGATACCTGTCCGCTTTCTCCCTTCGGGAAGCGTGGCG  
CTTTCTCATAGCTCACGCTGTAGGTATCTCAGTTCGGTGTAGGTCGTTTCGCTCCAAGC  
TGGGCTGTGTGCACGAACCCCCGTTTCAGCCCGACCGCTGCGCCTTATCCGGTAACT  
ATCGTCTTGAGTCCAACCCGGTAAGACACGACTTATCGCCACTGGCAGCAGCCACTG  
GTAACAGGATTAGCAGAGCGAGGTATGTAGGCCGGTGCTACAGAGTTCCTGAAGTGG  
TGGCCTAACTACGGCTACACTAGAAGGACAGTATTTGGTATCTGCGCTCTGCTGAAG  
CCAGTTACCTTCGGAAAAAGAGTTGGTAGCTCTTGATCCGGCAAACAAACCACCGCT  
GGTAGCGGTGGTTTTTTTTGTTTGCAAGCAGCAGATTACGCGCAGAAAAAAGGATCT  
CAAGAAGATCCTTTGATCTTTTCTACGGGGTCTGACGCTCAGTGAACGAAAACCTCA  
CGTTAAGGGATTTTGGTCATGAGATTATCAAAAAGGATCTTCACCTAGATCCTTTTA  
AATTAATAAATGAAGTTTTAAATCAATCTAAAGTATATATGAGTAAACTTGGTCTGAC  
AGTTACCAATGCTTAATCAGTGAGGCACCTATCTCAGCGATCTGTCTATTTTCGTTTCAT  
CCATAGTTGCCTGACTCCCCGTCGTGTAGATAACTACGATACGGGAGGGCTTACCAT  
CTGGCCCCAGTGCTGCAATGATACCGCGAGACCCACGCTCACCGGCTCCAGATTTAT  
CAGCAATAAACCAGCCAGCCGGAAGGGCCGAGCGCAGAAGTGGTCCTGCAACTTTA  
TCCGCCTCCATCCAGTCTATTAATTGTTGCCGGGAAGCTAGAGTAAGTAGTTCGCCA  
GTAAATAGTTTTCGCAACGTTGTTACCATTACTACAGGCATCGTGGTGTACAGCTCG  
TCGTTTGGTATGGCTTCATTCAGCTCCGGTTCCCAACGATCAAGGCGAGTTACATGA  
TCCCCCATGTTGTGCAAAAAAGCGGTTAGCTCCTTCGGTCCTCCGATCGTTGTCAGA  
AGTAAGTTGGCCGCAGTGTTATCACTCATGGTTATGGCAGCACTGCATAATTCTCTT  
ACTGTCATGCCATCCGTAAGATGCTTTTCTGTGACTGGTGAGTACTCAACCAAGTCA  
TTCTGAGAATAGTGTATGCGGCGACCGAGTTGCTCTTGCCCGGCGTCAATACGGGAT  
AATACCGCGCCACATAGCAGAACTTTAAAAGTGCTCATCATTGGAAAACGTTCTTCG  
GGGCGAAAACCTCTCAAGGATCTTACCACTATTGAGATCCAGTTCGATGTAACCCACT  
CGTGCACCCAACTGATCTTCAGCATCTTTTACTTTCACCAGCGTTTCTGGGTGAGCAA  
AAACAGGAAGGCAAAATGCCGCAAAAAAGGGAATAAGGGCGACACGGAAATGTTG  
AATACTCATACTCTTCCTTTTTCAATATTATTGAAGCATTATCAGGGTTATTGTCTC  
ATGAGCGGATACATATTTGAATGTATTTAGAAAAATAAACAAATAGGGGTTCGCG  
CACATTTCCCCGAAAGATGCCACCTGAAATTATAAACGTTAATATTTTGTAAAATT  
CGCGTTAAATTTTTGTAAAATCAGCTCATTTTTTAACCAATAGGCCGAAATCGGAAA  
AATCCCTTATAAATCAAAAAGAATAGACCGAGATAGGGTTGAGTGTTGTTCCAGTTTG  
GAACAAGAGTCCACTATTGAGGAACGTGAACCTCCAGCGTCAAAGGGCGAAAAACCG  
TCTATCGGGGCGATGGCCCACTACGTGAACCATCACCTAATCAAGTTTTTTGGGGT  
CGAGGTGCCGTAAGCACTAAATCGGAACCCTAAAGGGAGCCCCCGATTTAGAGCT  
TGACGGGGAAAGCCGGCGAACGTGGCGAGAAAGGAAGGGAAAGAAAGCGAAAGGA  
GCGGGCGCTAGGGCGCTGGCAAGTGTAGCGGTCACGCTGCGCGTAACCACCACACC  
CGCCGCGCTTAATGCGCCGCTACAGGGCGCGTCCCATTCGCCATTCAGGCTGCGCAA  
CTGTTGGGAAGGGCGATCGGTGCGGGCCTCTTCGCTATTACGC

>1771-pAAV-Apoa1-Target-2A-FAH-pA 5470 bp

CAGCTGCGCGCTCGCTCGCTCACTGAGGCCGCCCGGGCAAAGCCCCGGGCGTCCGGC  
GACCTTTGGTCGCCCGCCTCAGTGAGCGAGCGAGCGCGCAGAGAGGGGAGTGGCCA  
ACTCCATCACTAGGGGTTCTTGTAGTTAATGATTAACCCGCCATGCTACTTATCTAC  
GTAGCCATGCTCTGGAAAGCTTCATTAGGGGACAGGTGGCACCCAGCTATCATGTGC  
ATGGATCTGCAGACCAGGGGCAGCGCATGATGCCTGGGCTCGTCTCTCAGCCGCTCT  
CTTCCCCCTCTAGCCTGAATCTCCTGGAAAACCTGGGACACTCTGGGTTC AACCGTTA  
GTCAGCTGCAGGAACGGCTGGGCCATTGACTCGGGACTTCTGGGATAACCTGGAG  
AAAGAAACAGATTGGGTGAGACAGGAGATGAACAAGGACCTAGAGGAAGTGAAAC  
AGAAGGTGCAGCCCTACCTGGACGAATTCCAGAAGAAATGGAAAGAGGATGTGGA  
GCTCTACCGCCAGAAGGTGGCGCCTCTGGGCGCCGAGCTGCAGGAGAGCGCGCGCC  
AGAAGCTGCAGGAGCTGCAAGGGAGACTGTCCCCTGTGGCTGAGGAATTTTCGCGAC  
CGCATGCGCACACACGTAGACTCTCTGCGCACACAGCTAGCGCCCCACAGCGAACA  
GATGCGCGAGAGCCTGGCCAGCGCCTGGCTGAGCTCAAGAGCAACCCTACCTTGA  
ACGAGTACCACACCAGGGCCAAAACCCACCTGAAGACACTTGGCGAGAAAGCCAG  
ACCTGCGCTGGAGGACCTGCGCCATAGTCTGATGCCCATGCTGGAGACGCTTAAGA  
CCCAAGTCCAGAGTGTGATCGACAAGGCCAGCGAGACTCTGACTGCCCAGTCTAGA  
GGAAGCGGAGCCACTA ACTTCTCCCTGTTGAAACAAGCAGGGGATGTCTGAAGAGAA  
TCCCGGGCCAGGATCCATGTCCTTCATTCTGTCGCTGAAGACAGCGATTTCCCTATT  
CATAACCTCCCTTATGGAGTGTTCAGCACAAGGGGCGACCCAAGACCGAGGATAGG  
TGTGGCCATTGGCGACCAGATCCTGGACCTCAGCATCATCAAGCACCTCTTTACTGG  
TCCTGTCCTCTCCAAACACCAGGATGTCTTCAATCAGCCTACACTCAACAGCTTCAT  
GGGCCTGGGTCAGGCTGCCTGGAAGGAGGCGAGAGTGTCTTGCAGAACTTGCTGT  
CTGTGAGCCAAGCCAGGCTCAGAGATGACACCGAACTTCGGAAGTGTGCATTCATCT  
CCCAGGCTTCTGCCACGATGCACCTTCCAGCCACCATAGGAGACTATACCGATTTTT  
ACAGCAGCAGACAGCACGCCACAAATGTGGGCATTATGTTTCAGAGATAAAGAGAAC  
GCCCTGATGCCTAATTGGCTGCACTTACCAGTGGGCTACCATGGCCGTGCCTCCTCT  
GTCGTGGTGTCTGGCACCCCAATCCGAAGGCCCATGGGACAGATGAAACCTGATGA  
CTCTAAGCCTCCCGTATATGGTGCCTGCAAGCTCTTGGACATGGAGCTGGAAATGGC  
TTTTTTTGTAGGCCCTGGAAACAGATTGGGAGAGCCGATCCCCATTTCCAAGGCCCA  
TGAGCACATTTTTTGAATGGTCCTTATGAACGACTGGAGTGCACGAGACATTCAGAA  
GTGGGAGTATGTCCCTCTCGGGCCATTCCTTGGGAAGAGTTTTGGGACCACTGTCTC  
TCCGTGGGTGGTGCCCATGGATGCTCTCATGCCCTTTGCTGTGCCCAACCCGAAGCA  
GGACCCAGGCCCTGCCGTATCTGTGCCATGACGAGCCCTACACATTTGACATCAA  
CCTCTCTGTTAACCTGAAAGGAGAAGGAATGAGCCAGGCGGCTACCATATGCAAGT  
CCAATTTTAAGTACATGTACTGGACGATGCTGCAGCAGCTCACTCACCCTCTGTCA  
ACGGCTGCAACCTGCGGCCGGGGGACCTCCTGGCTTCTGGGACCATCAGCGGGCCG  
GAGCCAGAAAACCTTCGGCTCCATGTTGGAACGTGTCGTGGAAGGGAACGAAGCCCAT  
AGACCTGGGGAATGGTCAGACCAGGAAGTTTCTGCTGGACGGGGATGAAGTCATCA  
TAACAGGGTACTGCCAGGGGGATGGTTACCGCATCGGCTTTGGCCAGTGTGCTGGA  
AAAGTGCTGCCTGCTCTCCTGCCATCATGAACCGGTTTCGCGAATAAAAGATCTTTAT  
TTTCATTAGATCTGTGTGTTGGTTTTTTGTGTGATGCAGCGGTACCCTTCTTTCTTTGG  
GGGACATAGGGCGGGCGCTAAGGGGACATCAAGGGACGTGAGAACATGGTGCCGC

ACTGGGGATTCCCTTTGTACGCGACTACTCAGCTCTTAACGCTCACTCAAGCTGGGCA  
CCTGGCTGGTTCAGGGTATGAGACAGAATCCCTTCCTAAGAAGGCTCCAAGGGAAA  
TGGATGGCCAGGCAAAGCAACAAGGAACCCCAAAAGGGCCCCACAGAGGCTCAGA  
ACACTAGTGCTGTAAACCAGGATGAGAGTGTCTGGCAATAGGACTGGCTTTGAGAC  
CGCTGGTTTCTTGTGCTAGCCGAGTTTCCAGGTGGGGTCCAGAGGGTGCAGGACGGG  
AGCCTCTTCCACTCCCTAGAGCCAGGATTCCTTCAGGAGCCAGGAAGATTGGAGTTA  
TTGGGTGGGTGCTAATAAAAAGCCTGGAGCTGAACCCGATCTCGGTAAACAATTCCC  
TTTGATCTTTCCCTCCGACGCGTTACGTAGATAAGTAGCATGGCGGGTTAATCATT  
ACTACAAGGAACCCCTAGTGATGGAGTTGGCCACTCCCTCTCTGCGCGCTCGCTCGC  
TCACTGAGGCCGGGCGACCAAAGGTCGCCGACGCCGGGCTTTGCCCGGGCGGCC  
TCAGTGAGCGAGCGAGCGCGCAGCTGCATTAATGAATCGGCCAACGCGCGGGGAGA  
GGCGGTTTGCGTATTGGGCGCTCTTCCGCTTCCTCGCTCACTGACTCGCTGCGCTCGG  
TCGTTCCGCTGCGGCGAGCGGTATCAGCTCACTCAAAGGCGGTAATACGGTTATCCA  
CAGAATCAGGGGATAACGCAGGAAAGAACATGTGAGCAAACCGCAGCAAAGGC  
CAGGAACCGTAAAAAGGCCGCGTTGCTGGCGTTTTTCCATAGGCTCCGCCCCCTGA  
CGAGCATCAGAAAATCGACGCTCAAGTCAGAGGTGGCGAAACCCGACAGGACTAT  
AAAGATAACAGGCGTTTCCCCTGGAAGCTCCCTCGTGCGCTCTCCTGTTCCGACCC  
TGCCGCTTACCGGATACCTGTCCGCTTTCTCCCTTCGGGAAGCGTGGCGCTTTCTCA  
TAGCTCACGCTGTAGGTATCTCAGTTCGGTGTAGGTCGTTTCGCTCCAAGCTGGGCTG  
TGTGCACGAACCCCCGTTACAGCCCGACCGCTGCGCCTTATCCGGTAACTATCGTCT  
TGAGTCCAACCCGTAAGACACGACTTATCGCCACTGGCAGCAGCCACTGGTAACA  
GGATTAGCAGAGCGAGGTATGTAGGCGGTGCTACAGAGTTCTTGAAGTGGTGGCCT  
AACTACGGCTACACTAGAAGGACAGTATTTGGTATCTGCGCTCTGCTGAAGCCAGTT  
ACCTTCGGAAAAAGAGTTGGTAGCTCTTGATCCGGCAAACAAACCACCGCTGGTAG  
CGGTGGTTTTTTTTGTTTGCAAGCAGCAGATTACGCGCAGAAAAAAGGATCTCAAGA  
AGATCCTTTGATCTTTTCTACGGGGTCTGACGCTCAGTGGAACGAAAACACTCACGTTA  
AGGGATTTTGGTCATGAGATTATCAAAAAGGATCTTCACCTAGATCCTTTTAAATTA  
AAAATGAAGTTTTAAATCAATCTAAAGTATATATGAGTAAACTTGGTCTGACAGTTA  
CCAATGCTTAATCAGTGAGGCACCTATCTCAGCGATCTGTCTATTTTCGTTTCATCCATA  
GTTGCCTGACTCCCCGTCGTGTAGATAACTACGATACGGGAGGGCTTACCATCTGGC  
CCCAGTGCTGCAATGATACCGCGAGACCCACGCTCACCGGCTCCAGATTTATCAGCA  
ATAAACCAGCCAGCCGGAAGGGCCGAGCGCAGAAGTGGTCCTGCAACTTTATCCGC  
CTCCATCCAGTCTATTAATTGTTGCCGGGAAGCTAGAGTAAGTAGTTCGCCAGTTAA  
TAGTTTGCGCAACGTTGTTACCATTACTACAGGCATCGTGGTGTACGCTCGTCGTTT  
GGTATGGCTTCATTCAGCTCCGTTCCCAACGATCAAGGCGAGTTACATGATCCCCC  
ATGTTGTGCAAAAAAGCGGTTAGCTCCTTCGGTCCTCCGATCGTTGTCAGAAGTAAG  
TTGGCCGCAGTGTTATCACTCATGGTTATGGCAGCACTGCATAATTCTCTTACTGTCA  
TGCCATCCGTAAGATGCTTTTCTGTGACTGGTGAGTACTCAACCAAGTCATTCTGAG  
AATAGTGTATGCGGCGACCGAGTTGCTCTTGCCCGGCGTCAATACGGGATAATACCG  
CGCCACATAGCAGAACTTTAAAAGTGCTCATCATTGGAAAACGTTCTTCGGGGCGAA  
AACTCTCAAGGATCTTACCACTATTGAGATCCAGTTCGATGTAACCCACTCGTGCAC  
CCAATGATCTTCAGCATCTTTTACTTTACCAGCGTTTCTGGGTGAGCAAAAACAG  
GAAGGCAAAATGCCGCAAAAAAGGGAATAAGGGCGACACGGAAATGTTGAATACT

CATACTCTTCCTTTTTCAATATTATTGAAGCATTTATCAGGGTTATTGTCTCATGAGC  
GGATACATATTTGAATGTATTTAGAAAAATAAACAAATAGGGGTTCCGCGCACATTT  
CCCCGAAAGATGCCACCTGAAATTATAAACGTTAATATTTTGTTAAAATTCGCGTTA  
AATTTTTGTTAAATCAGCTCATTTTTTAACCAATAGGCCGAAATCGGAAAAATCCCT  
TATAAATCAAAGAATAGACCGAGATAGGGTTGAGTGTGTTCCAGTTTGGAACAA  
GAGTCCACTATTGAGGAACGTGAACTCCAGCGTCAAAGGGCGAAAAACCGTCTATC  
GGGGCGATGGCCCACTACGTGAACCATCACCTAATCAAGTTTTTTGGGGTTCGAGGT  
GCCGTAAAGCACTAAATCGGAACCCTAAAGGGAGCCCCGATTTAGAGCTTGACGG  
GGAAAGCCGGCGAACGTGGCGAGAAAGGAAGGAAGAAAGCGAAAGGAGCGGGC  
GCTAGGGCGCTGGCAAGTGTAGCGGTACGCTGCGCGTAACCACCACACCCGCCGC  
GCTTAATGCGCCGCTACAGGGCGCGTCCATTCGCCATTCAGGCTGCGCAACTGTTG  
GGAAGGGCGATCGGTGCGGGCCTCTTCGCTATTACGC

>1161-pAAV-CB-EGFP 5478 bp

CTGCGCGCTCGCTCGCTCACTGAGGCCGCCCGGGCAAAGCCCGGGCGTCGGGGCGAC  
CTTTGGTTCGCCCGCCTCAGTGAGCGAGCGAGCGCGCAGAGAGGGAGTGCCAACT  
CCATCACTAGGGGTTCTTGTAGTTAATGATTAACCCGCCATGCTACTTATCTACGTA  
GCCATGCTCTAGGAAGATCGGAATTCGCCCTTAAGCTAGTATGCCAAGTACGCCCC  
TATTGACGTCAATGACGGTAAATGGCCCGCCTGGCATTATGCCCAGTACATGACCTT  
ATGGGACTTTCCTACTTGGCAGTACATCTACTCGAGGCCACGTTCTGCTTCACTCTCC  
CCATCTCCCCCCCCCTCCCCACCCCAATTTTGTATTTATTTATTTTTAATTATTTTGT  
GCAGCGATGGGGGCGGGGGGGGGGGCGCGCGCCAGGCGGGGCGGGGCGGGGCGA  
GGGGCGGGGCGGGGCGAGGCGGAGAGGTGCGGCGGCAGCCAATCAGAGCGGGCGCG  
CTCCGAAAGTTTCCTTTTATGGCGAGGCGGCGGCGGCGGCCCTATAAAAAGCG  
AAGCGCGCGGGCGGGGAGCGGGATCAGAATGATCTGATATCATCGATGAATTCG  
AGCTCGGTACCCGGGGATCCTCTAGAGTCGAGGAACTGAAAAACCAGAAAGTTAAC  
TGGTAAGTTTAGTCTTTTTGTCTTTTATTTAGGTCCCGGATCCGGTGGTGGTGCAA  
TCAAAGAACTGCTCCTCAGTGGATGTTGCCTTTACTTCTAGGGAAGTTGGTTCGTGAG  
GCACTGGGCAGGTAAGTATCAAGGTTACAAGACAGGTTTAAGGAGACCAATAGAAA  
CTGGGCTTGTGCGAGACAGAGAAGACTCTTGCGTTTCTGATAGGCACCTATTGGTCTT  
ACTGACATCCACTTTGCCTTTCTCTCCACAGGTGTCCAGGCGGCCGCCATGGTGAGC  
AAGGGCGAGGAGCTGTTACCCGGGGTGGTGCCATCCTGGTCGAGCTGGACGGCGA  
CGTAAACGGCCACAAGTTCAGCGTGTCCGGCGAGGGCGAGGGCGATGCCACCTACG  
GCAAGCTGACCCTGAAGTTCATCTGCACCACCGGCAAGCTGCCCGTGCCCTGGCCCA  
CCCTCGTGACCACCCTGACCTACGGCGTGCAGTGCTTCAGCCGCTACCCCGACCACA  
TGAAGCAGCACGACTTCTTCAAGTCCGCCATGCCCGAAGGCTACGTCCAGGAGCGC  
ACCATCTTCTTCAAGGACGACGGCAACTACAAGACCCGCGCCGAGGTGAAGTTCGA  
GGGCGACACCCTGGTGAACCGCATCGAGCTGAAGGGCATCGACTTCAAGGAGGACG  
GCAACATCCTGGGGCACAAGCTGGAGTACAACACTACAACAGCCACAACGTCTATATC  
ATGGCCGACAAGCAGAAGAACGGCATCAAGGTGAACTTCAAGATCCGCCACAACAT  
CGAGGACGGCAGCGTGCAGCTCGCCGACCACTACCAGCAGAACACCCCATCGGCG

ACGGCCCCGTGCTGCTGCCCCGACAACCACTACCTGAGCACCCAGTCCGCCCTGAGCA  
AAGACCCCAACGAGAAGCGCGATCACATGGTCCTGCTGGAGTTCGTGACCGCCGCC  
GGGATCACTCTCGGCATGGACGAGCTGTACAAGTAATAAGCTTGGATCCAATCAAC  
CTCTGGATTACAAAATTTGTGAAAGATTGACTGGTATTCTTAACTATGTTGCTCCTTT  
TACGCTATGTGGATACGCTGCTTTAATGCCTTTGTATCATGCTATTGCTTCCCGTATG  
GCTTTCATTTTCTCCTCCTTGTATAAATCCTGGTTGCTGTCTCTTTATGAGGAGTTGTG  
GCCCCGTTGTCAGGCAACGTGGCGTGGTGTGCACTGTGTTTGTGCTGACGCAACCCCCAC  
TGTTTGGGGCATTGCCACCACCTGTCAGCTCCTTTCCGGGACTTTCGCTTTCCCCCTC  
CCTATTGCCACGGCGGAATCATCGCCGCTGCCTTGCCCGCTGCTGGACAGGGGCT  
CGGCTGTTGGGCACTGACAATCCGTGGTGTGTCGGGGAAATCATCGTCCTTTCCCTT  
GGCTGCTCGCCTGTGTTGCCACCTGGATTCTGCGCGGGACGTCCTTCTGCTACGTCCC  
TTCGGCCCTCAATCCAGCGGACCTTCTTCCC CGGGCCTGCTGCCGGCTCTGCGGCC  
TCTTCCGCGTCTTCGAGATCTGCCTCGACTGTGCCTTCTAGTTGCCAGCCATCTGTTG  
TTTGGCCCCCCCCGTGCCTTCTTGACCCTGGAAGGTGCCACTCCC ACTGTCCTTTC  
CTAATAAAATGAGGAAATTGCATCGCATTGTCTGAGTAGGTGTCATTCTATTCTGGG  
GGGTGGGGTGGGGCAGGACAGCAAGGGGGAGGATTGGGAAGACAATAGCAGGCAT  
GCTGGGGACTCGAGTTAAGGGCGAATTCCCGATAAGGATCTTCTAGAGCATGGCT  
ACGTAGATAAGTAGCATGGCGGGTTAATCATTAACTACAAGGAACCCCTAGTGATG  
GAGTTGGCCACTCCCTCTCTGCGCGCTCGCTCGCTCACTGAGGCCGGGCGACCAAAG  
GTCGCCCCGACGCCCGGGCTTTGCCCGGGCGGCCTCAGTGAGCGAGCGAGCGCGCAG  
CCTTAATTAACCTAATTC ACTGGCCGTCGTTTTACAACGTCGTGACTGGGAAAACCC  
TGGCGTTACCCA ACTTAATCGCCTTG CAGCACATCCCCCTTTCGCCAGCTGGCGTAA  
TAGCGAAGAGGCCCGCACCGATCGCCCTTCCAACAGTTGCGCAGCATGAATGGCG  
AATGGGACGCGCCCTGTAGCGGCGCATTAAAGCGCGGCGGGTGTGGTGGTTACGCGC  
AGCGTGACCGCTACACTTGCCAGCGCCCTAGCGCCCGCTCCTTTCGCTTTCTTCCCTT  
CCTTTCTCGCCACGTTTCGCCGGCTTTCCCCGTCAAGCTCTAAATCGGGGGCTCCCTTT  
AGGGTTCCGATTTAGTGCTTTACGGCACCTCGACCCCAAAAACTTGATTAGGGTGA  
TGGTTCACGTAGTGGGCCATCGCCCTGATAGACGGTTTTTTCGCCCTTTGACGTTGGA  
GTCCACGTTCTTTAATAGTGGACTCTTGTTC AACTGGAACAACACTCAACCCTAT  
CTCGGTCTATTCTTTTGATTTATAAGGGATTTTGCCGATTTTCGGCCTATTGGTTAAAA  
AATGAGCTGATTTAACAAAAATTTAACGCGAATTTTAACAAAATATTAACGCTTACA  
ATTTAGGTGGCACTTTTCGGGGAAATGTGCGCGGAACCCCTATTTGTTTATTTTTCTA  
AATACATTCAAATATGTATCCGCTCATGAGACAATAACCCTGATAAATGCTTCAATA  
ATATTGAAAAAGGAAGAGTATGAGTATTCAACATTTCCGTGTCGCCCTTATTCCCTT  
TTTTGCGGCATTTTGCTTCCCTGTTTTTTGCTACCCAGAAACGCTGGTGAAAGTAAAA  
GATGCTGAAGATCAGTTGGGTGCACGAGTGGGTACATCGAACTGGATCTCAACAG  
CGGTAAGATCCTTGAGAGTTTTTCGCCCCGAAGAACGTTTTTCCAATGATGAGCACTTT  
TAAAGTTCTGCTATGTGGCGCGGTATTATCCCGTATTGACGCCGGGCAAGAGCAACT  
CGGTCGCCGCATACACTATTCTCAGAATGACTTGGTTGAGTACTACCAGTCACAGA  
AAAGCATCTTACGGATGGCATGACAGTAAGAGAATTATGCAGTGCTGCCATAACCA  
TGAGTGATAACACTGCGGCCAACTTACTTCTGACAACGATCGGAGGACCGAAGGAG  
CTAACCGCTTTTTTGCACAACATGGGGGATCATGTA ACTCGCCTTGATCGTTGGGAA  
CCGGAGCTGAATGAAGCCATAACCAAACGACGAGCGTGACACCACGATGCCTGTAGC

AATGGCAACAACGTTGCGCAAACCTATTAACCTGGCGAACTACTTACTCTAGCTTCCCG  
GCAACAATTAATAGACTGGATGGAGGCGGATAAAGTTGCAGGACCACTTCTGCGCT  
CGGCCCTTCCGGCTGGCTGGTTTATTGCTGATAAATCTGGAGCCGGTGAGCGTGGGT  
CTCGCGGTATCATTGCAGCACTGGGGCCAGATGGTAAGCCCTCCCGTATCGTAGTTA  
TCTACACGACGGGGAGTCAGGCAACTATGGATGAACGAAATAGACAGATCGCTGAG  
ATAGGTGCCTCACTGATTAAGCATTGGTAACCTGTCAGACCAAGTTTACTCATATATA  
CTTTAGATTGATTTAAAACCTTCATTTTTAATTTAAAAGGATCTAGGTGAAGATCCTTT  
TTGATAATCTCATGACCAAAAATCCCTTAACGTGAGTTTTTCGTTCCACTGAGCGTCAG  
ACCCCGTAGAAAAGATCAAAGGATCTTCTTGAGATCCTTTTTTTCTGCGCGTAATCT  
GCTGCTTGCAAACAAAAAACACCGCTACCAGCGGTGGTTTTGTTTGCCGGATCAAG  
AGCTACCAACTCTTTTTCCGAAGGTAACCTGGCTTCAGCAGAGCGCAGATACCAAATA  
CTGTTCTTCTAGTGTAGCCGTAGTTAGGCCACCACTTCAAGAACTCTGTAGCACCGC  
CTACATACCTCGCTCTGCTAATCCTGTTACCAGTGGCTGCTGCCAGTGGCGATAAGT  
CGTGTCTTACCGGGTTGGACTCAAGACGATAGTTACCGGATAAAGGCGCAGCGGTCTG  
GGCTGAACGGGGGGTTCGTGCACACAGCCCAGCTTGGAGCGAACGACCTACACCGA  
ACTGAGATACCTACAGCGTGAGCTATGAGAAAGCGCCACGCTTCCCGAAGGGAGAA  
AGGCGGACAGGTATCCGGTAAGCGGCAGGGTTCGGAACAGGAGAGCGCACGAGGGA  
GCTTCCAGGGGGAAACGCCTGGTATCTTTATAGTCTGTCTGGGTTTCGCCACCTCTG  
ACTTGAGCGTCGATTTTTGTGATGCTCGTCAGGGGGGCGGAGCCTATGGAAAAACGC  
CAGCAACGCGGCCTTTTTACGGTTCCTGGCCTTTTGCTGGCCTTTTGCTCACATGTTT  
TTTCTGCGTTATCCCCTGATTCTGTGGATAACCGTATTACCGCCTTTGAGTGAGCTG  
ATACCGCTCGCCGCAGCCGAACGACCGAGCGCAGCGAGTCAGTGAGCGAGGAAGC  
GGAAGAGCGCCAATACGCAAACCGCCTCTCCCCGCGCGTTGGCCGATTCATTAATG  
CAGCTGGCACGACAGGTTTCCCGACTGGAAAGCGGGCAGTGAGCGCAACGCAATTA  
ATGTGAGTTAGCTCACTCATTAGGCACCCCAGGCTTTACACTTTATGCTTCCGGCTCG  
TATGTTGTGTGGAATTGTGAGCGGATAACAATTTACACAGGAAACAGCTATGACCA  
TGATTACGCCAGATTTAATTAAGG



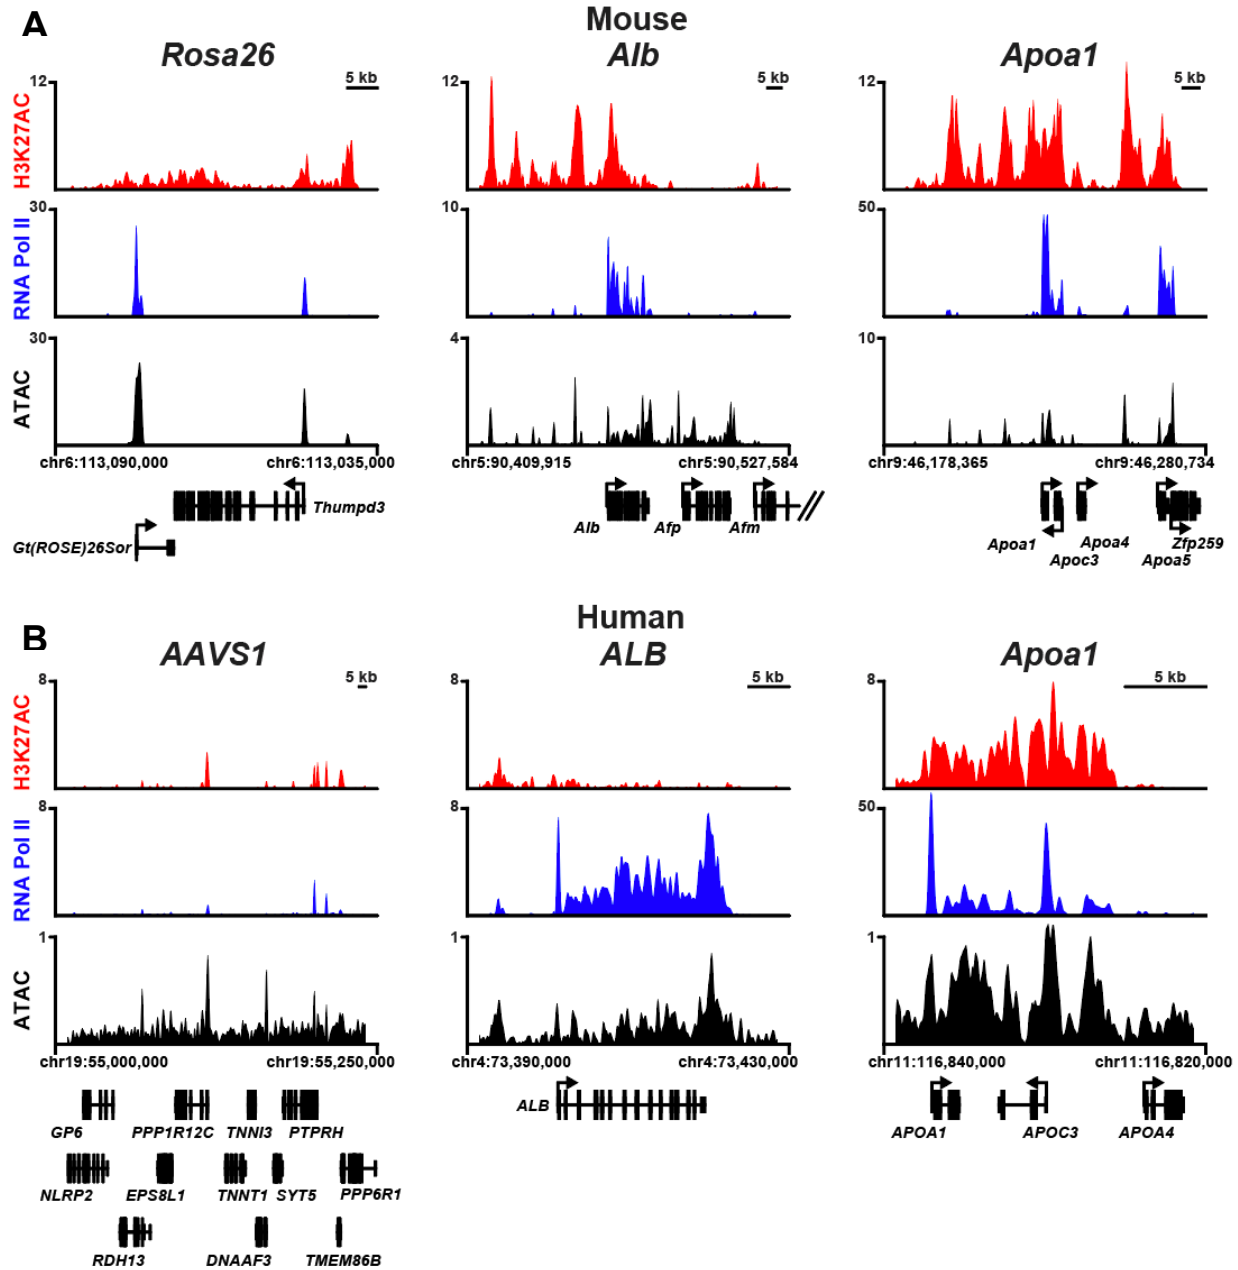

**Figure S1: High chromatin accessibility and active transcription at the *Apoa1* locus in mouse and human liver.** (A) ChIP-seq profile of histone H3K27 acetylation, RNA Polymerase II binding, and ATAC-seq chromatin accessibility for a safe harbor locus (*Rosa26*), and select loci for genes that are highly expressed in murine liver (*Alb* and *Apoa1*). (B) ChIP-seq profiling and ATAC-sequencing for a safe harbor locus, adeno-associated virus integration site 1 (*AAVS1*) as well as the same highly expressed loci (*ALB*, *APOA1*) in human hepatocytes from an adult female liver from the ENCODE database.

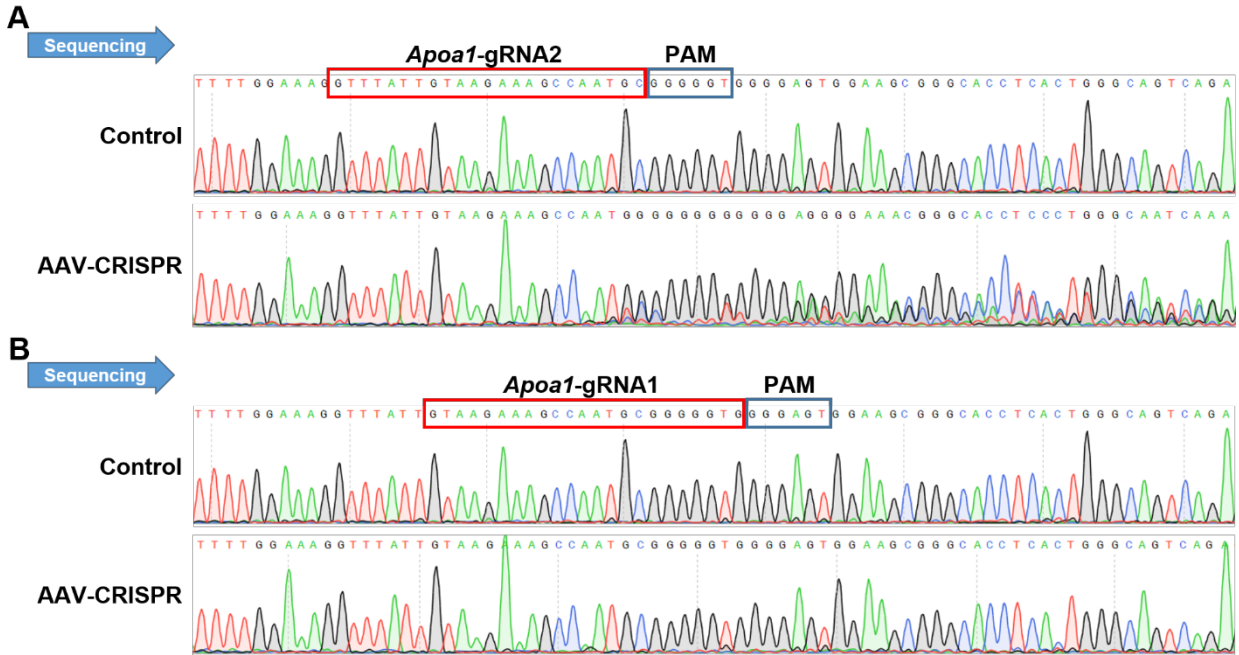

**Figure S2: Screening of gRNAs for targeting *Apoa1* 3'UTR.** (A) Sanger sequencing chromatograms of *Apoa1* 3'UTR showed multiple sequence traces in liver of AAV-CRISPR-injected mice due to NHEJ-derived indel formation. (B) *Apoa1*-gRNA1 failed in inducing indel formation. Control: wild type *Apoa1* 3'UTR sequence. gRNA and PAM sequences are marked in red and blue, respectively. Sequencing direction is indicated by the arrow.

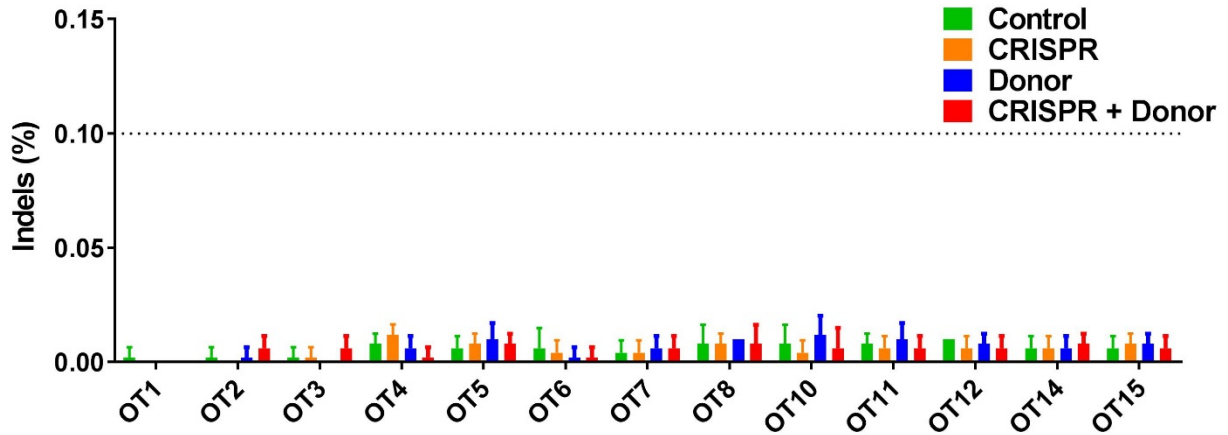

**Figure S3: No detectable Off Target (OT) activity of the SaCas9 gRNA targeting the *ApoA1* 3'UTR.** Deep sequencing analysis of indel formation rate in off target sites predicted by COSMID. Data are shown as mean  $\pm$  standard deviation (n=5). A one-way ANOVA followed by Tukey test revealed no significant differences for OTs among groups. All the indel formation rates are below the limit of detection (0.1%).

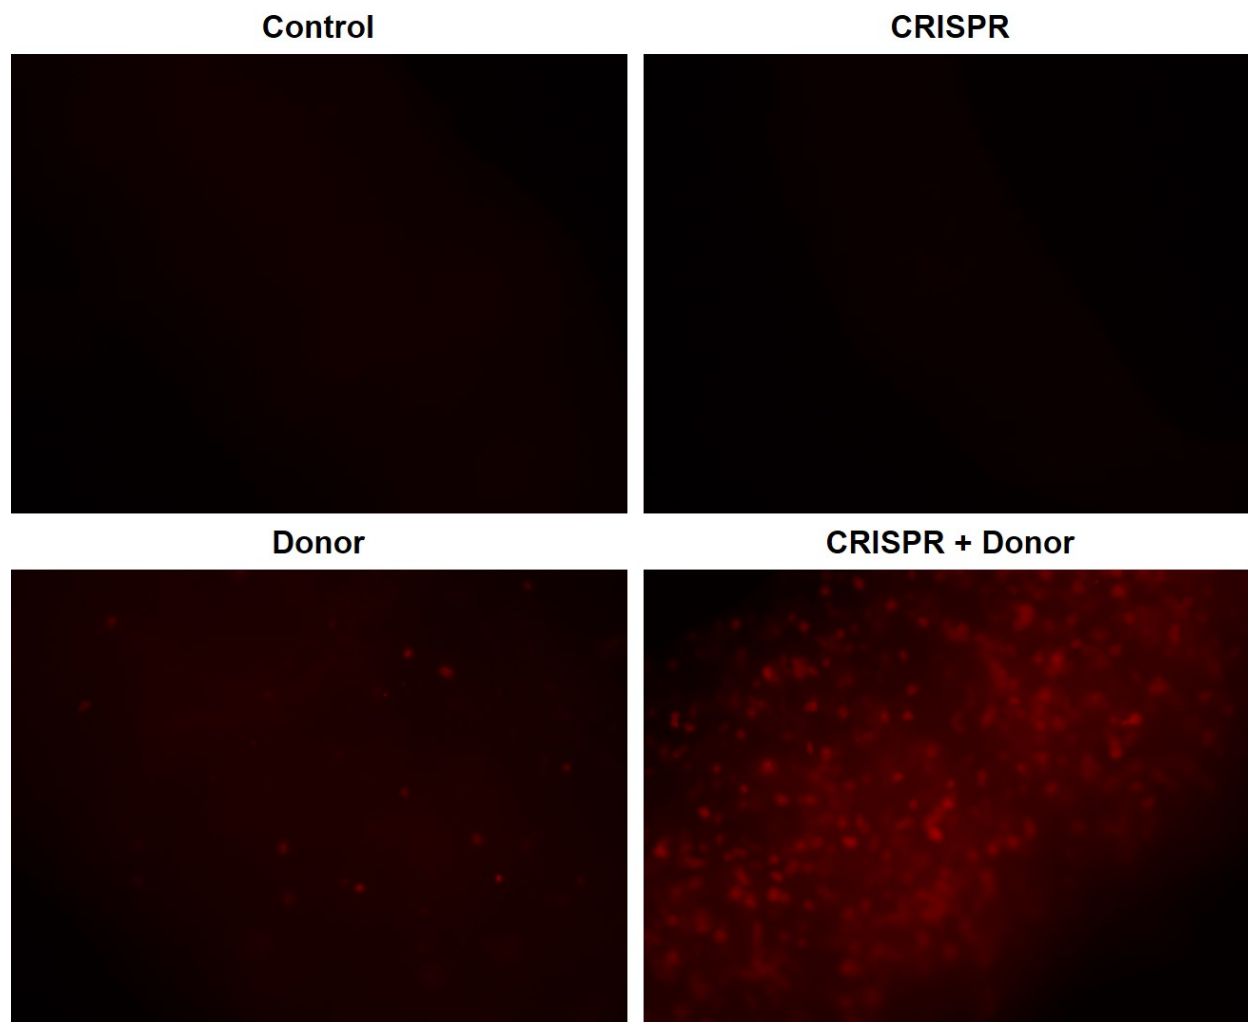

**Figure S4: Efficient expression of mKate2 in *ApoA1*-targeted mice.** Direct mKate2 fluorescence in fresh liver slices from *ApoA1*-targeted mice. A 10x objective lens and 80 ms exposure time were used.

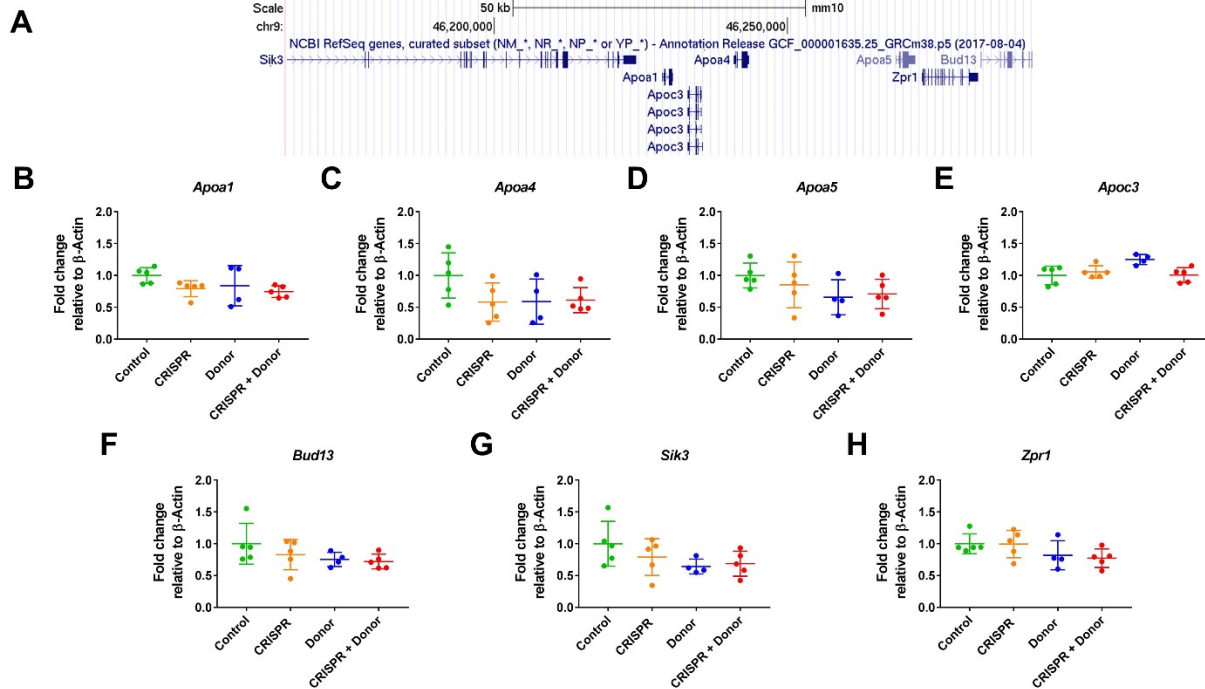

**Figure S5: Targeting of *Apoa1* does not adversely affect expression of neighboring genes.** (A) Schematic diagram of *Apoa1* and neighboring loci on Chromosome 9 by UCSC genome browser (*Mus Musculus* genome assembly GRCm38/mm10). Expression of *Apoa1* (B) and neighboring genes at the *Apoa1* locus by qPCR: (C) Apolipoprotein a4 (*Apoa4*), (D) Apolipoprotein a5 (*Apoa5*), (E) Apolipoprotein c3 (*Apoc3*), (F) *Bud13*, (G) SIK family kinase 3 (*Sik3*) and (H) Zinc finger protein 1 (*Zpr1*). Data are expressed as fold change relative to  $\beta$ -Actin and shown as mean  $\pm$  standard deviation (n=5 for all groups except for Donor, n=4). A one-way ANOVA followed by Tukey test revealed no significant differences among groups in all the panels.

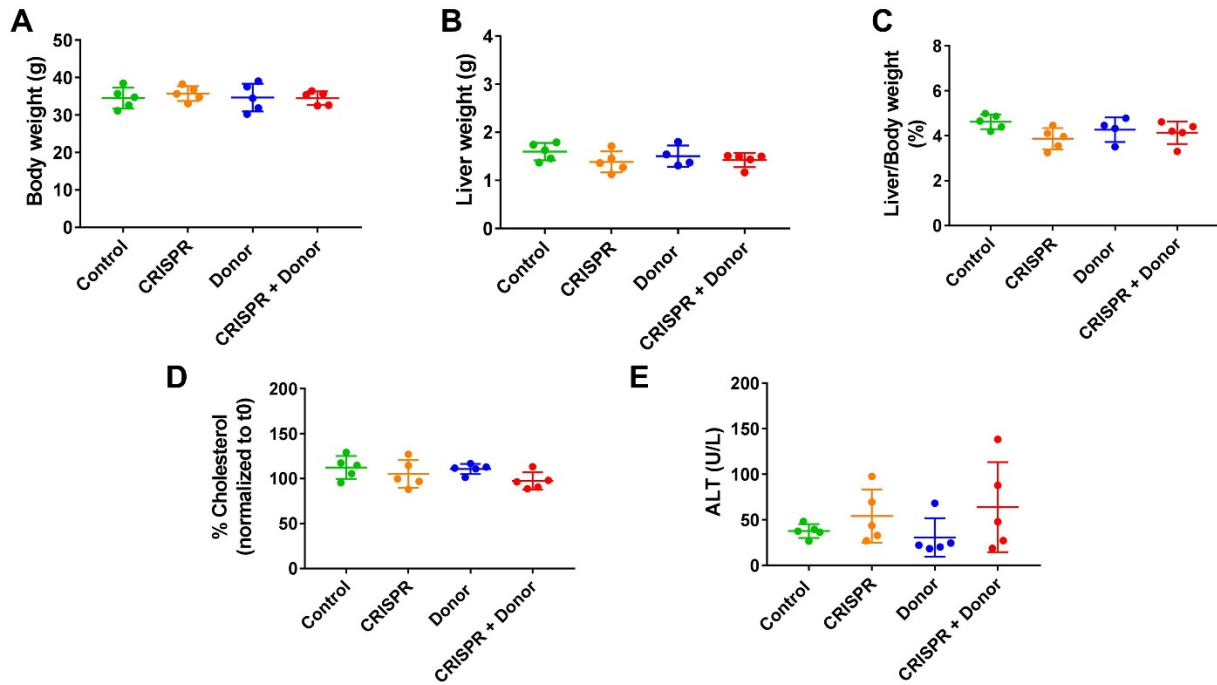

**Figure S6: Targeting of *ApoA1* is safe and well-tolerated.** (A) Body and (B) liver weights at 12 weeks post-AAV injection. (C) Liver/body weight ratios. (D) Total plasma cholesterol levels normalized to baseline at time 0. (E) ALT levels in plasma at endpoint. Data are shown as mean  $\pm$  standard deviation (n=5). A one-way ANOVA followed by Tukey test revealed no significant differences among groups in all the panels.

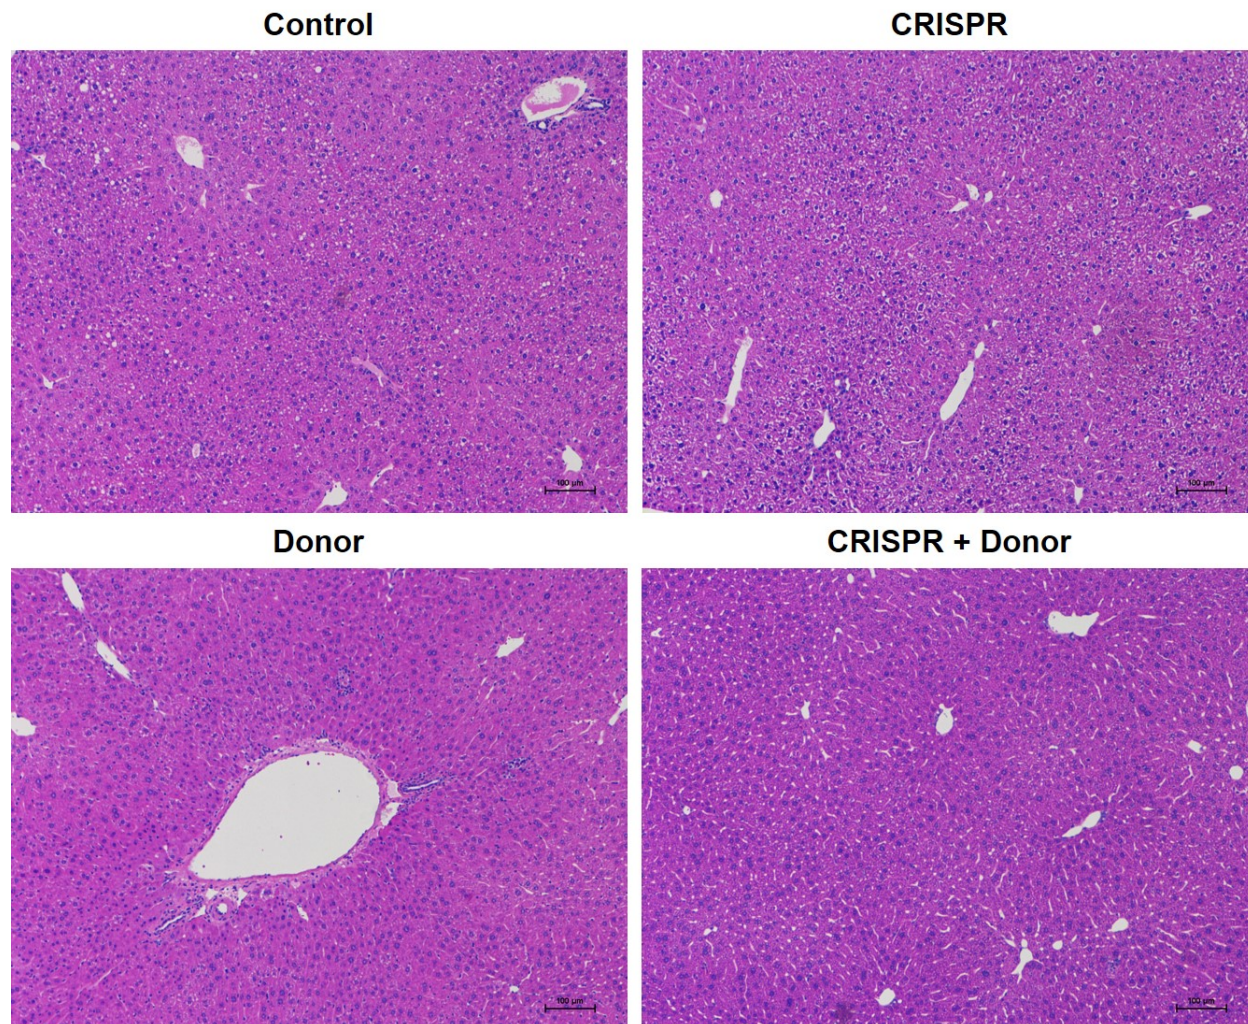

**Figure S7: No histopathological abnormalities in liver from *ApoA1*-targeted mice.** Representative H&E staining of livers from *ApoA1*-targeted mice. Scale bar is 100 μm.

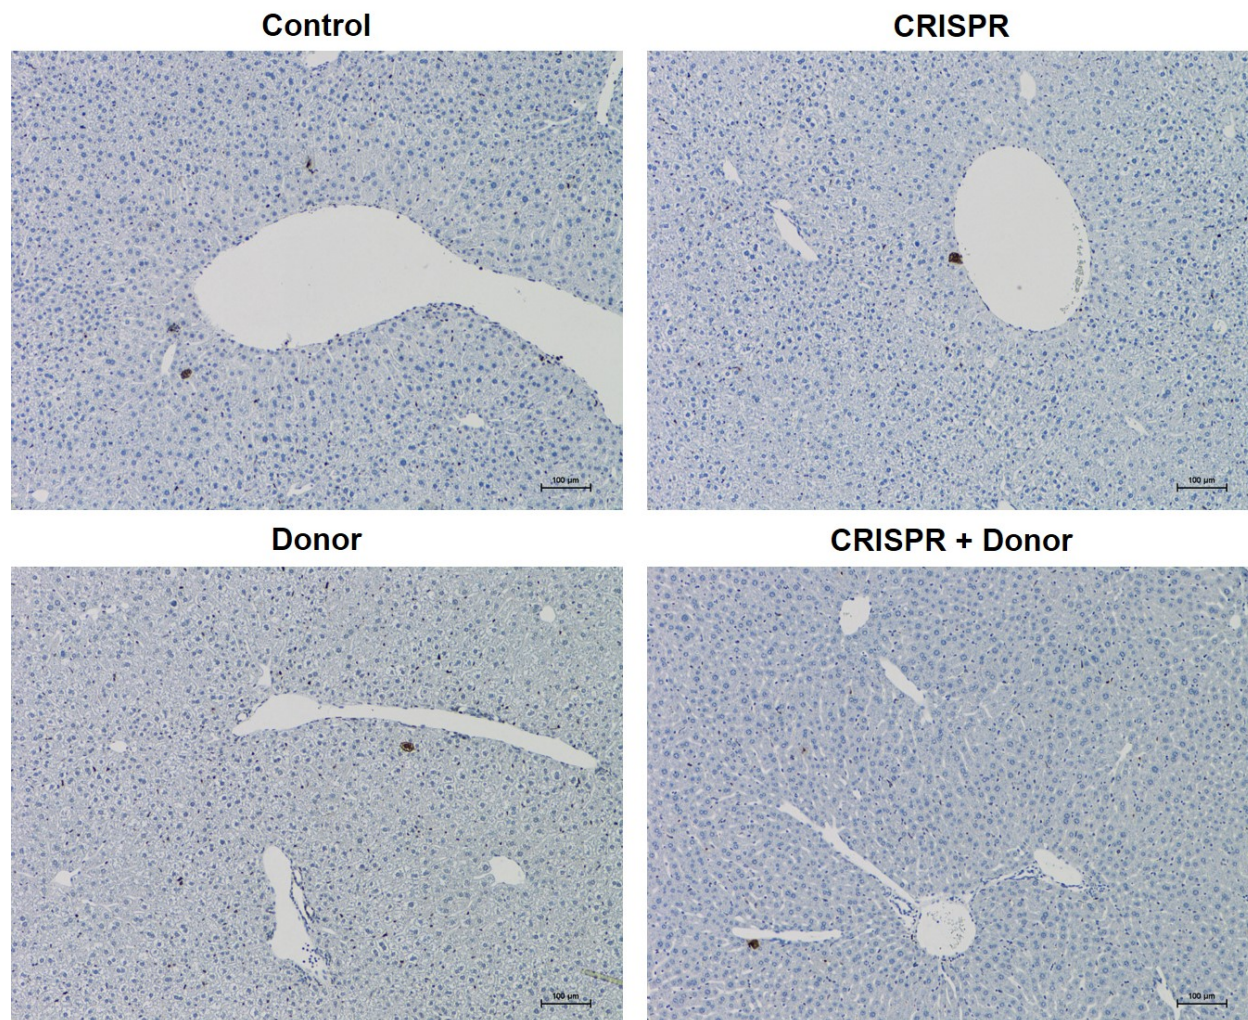

**Figure S8: Normal incidence of hepatocyte apoptosis in *Apoa1*-targeted mice.** Representative TUNEL staining of livers from *Apoa1*-targeted mice at 12 weeks post-injection. Scale bar is 100 μm.



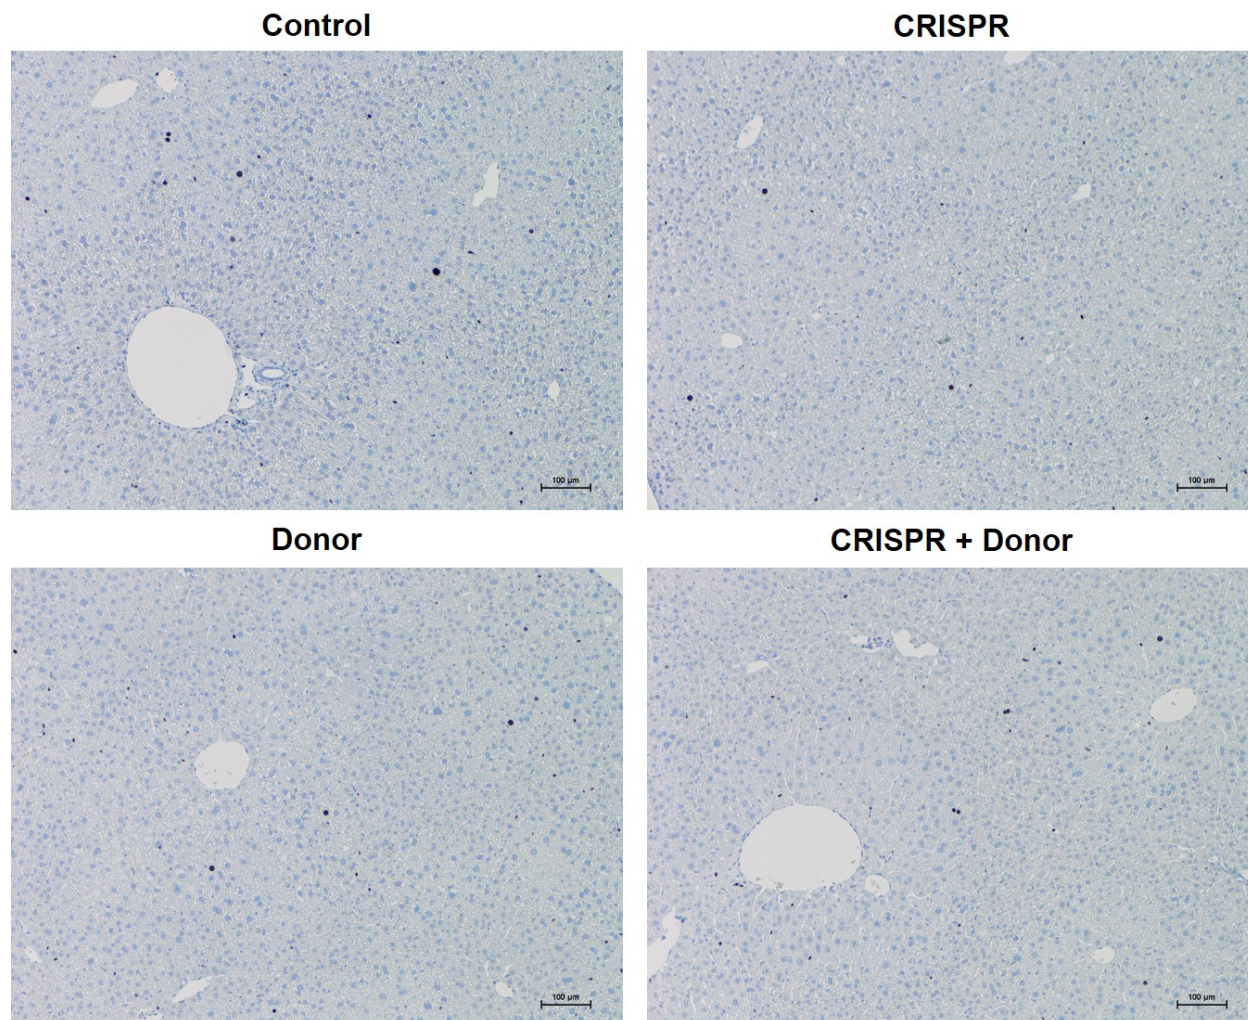

**Figure S9: Normal rates of proliferation in livers of *ApoA1*-targeted mice.** Representative Ki67 staining of livers from *ApoA1*-targeted mice. Scale bar is 100 μm.

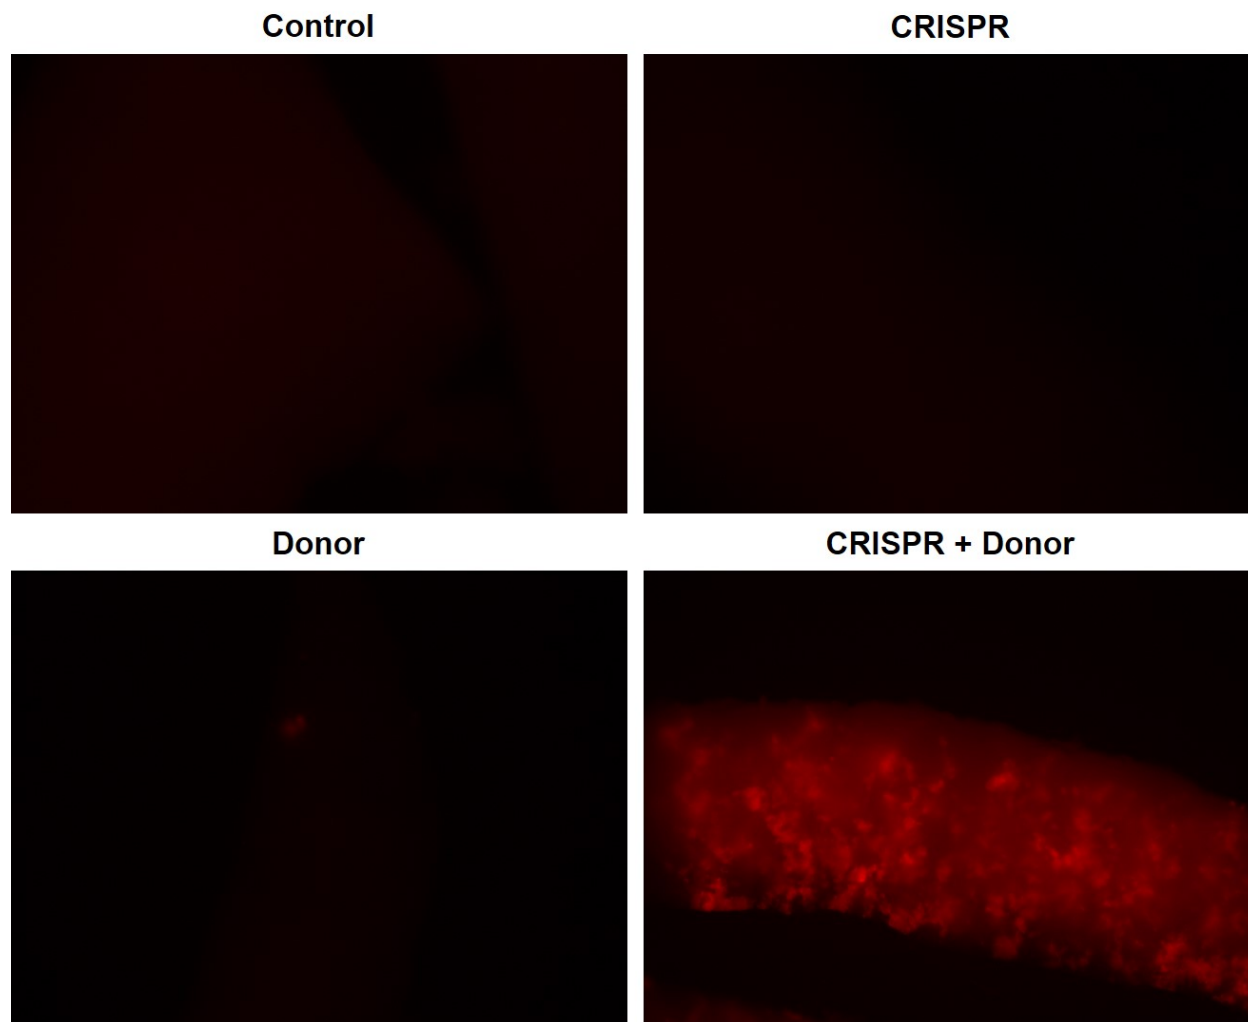

**Figure S10: Efficient expression of mKate2 in *Apoa1*-targeted mice injected at P4.** Direct mKate2 fluorescence in fresh liver slices from *Apoa1*-targeted mice. Representative images are shown. A 4x objective lens and 45 ms exposure time were used.

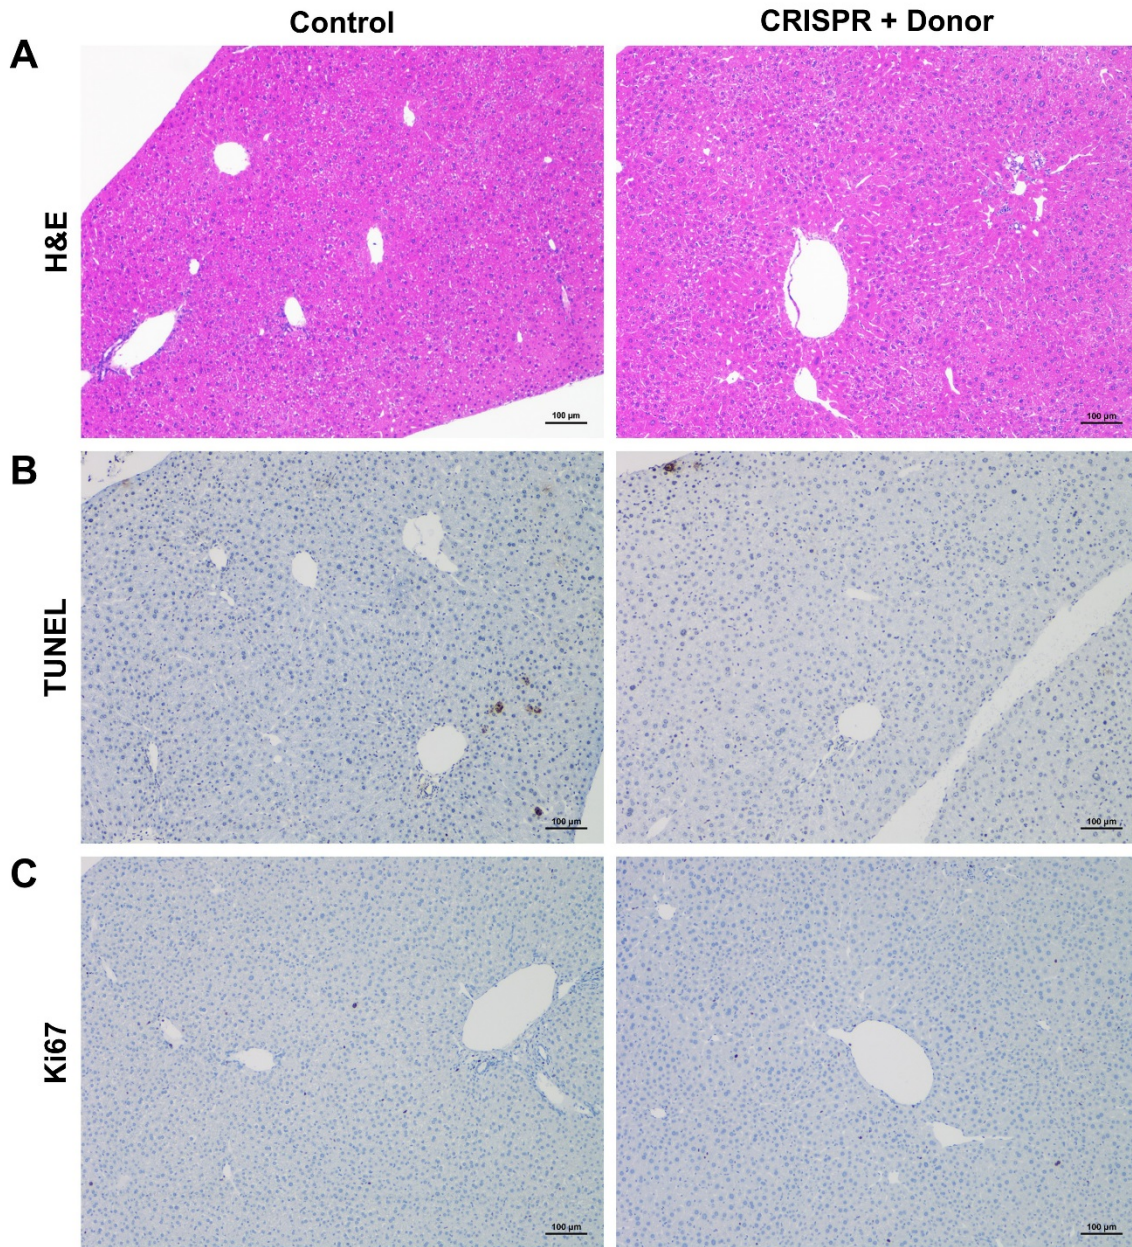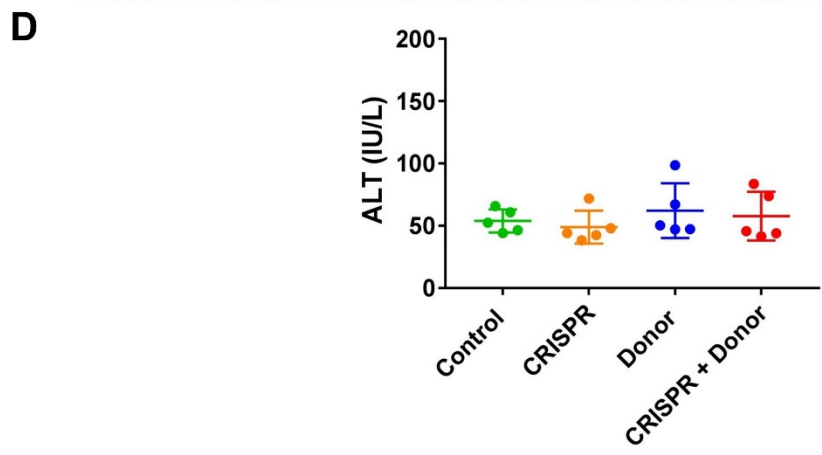

**Figure S11: No histopathological abnormalities or toxicity in liver from P4-injected *Apoa1*-targeted mice.** Representative (A) H&E, (B) TUNEL and (C) Ki67 staining of livers from *Apoa1*-targeted mice. Scale bar is 100  $\mu$ m. (D) ALT levels in plasma at endpoint. Data are shown as mean  $\pm$  standard deviation (n=5). A one-way ANOVA followed by Tukey test revealed no significant differences in ALT levels among groups.

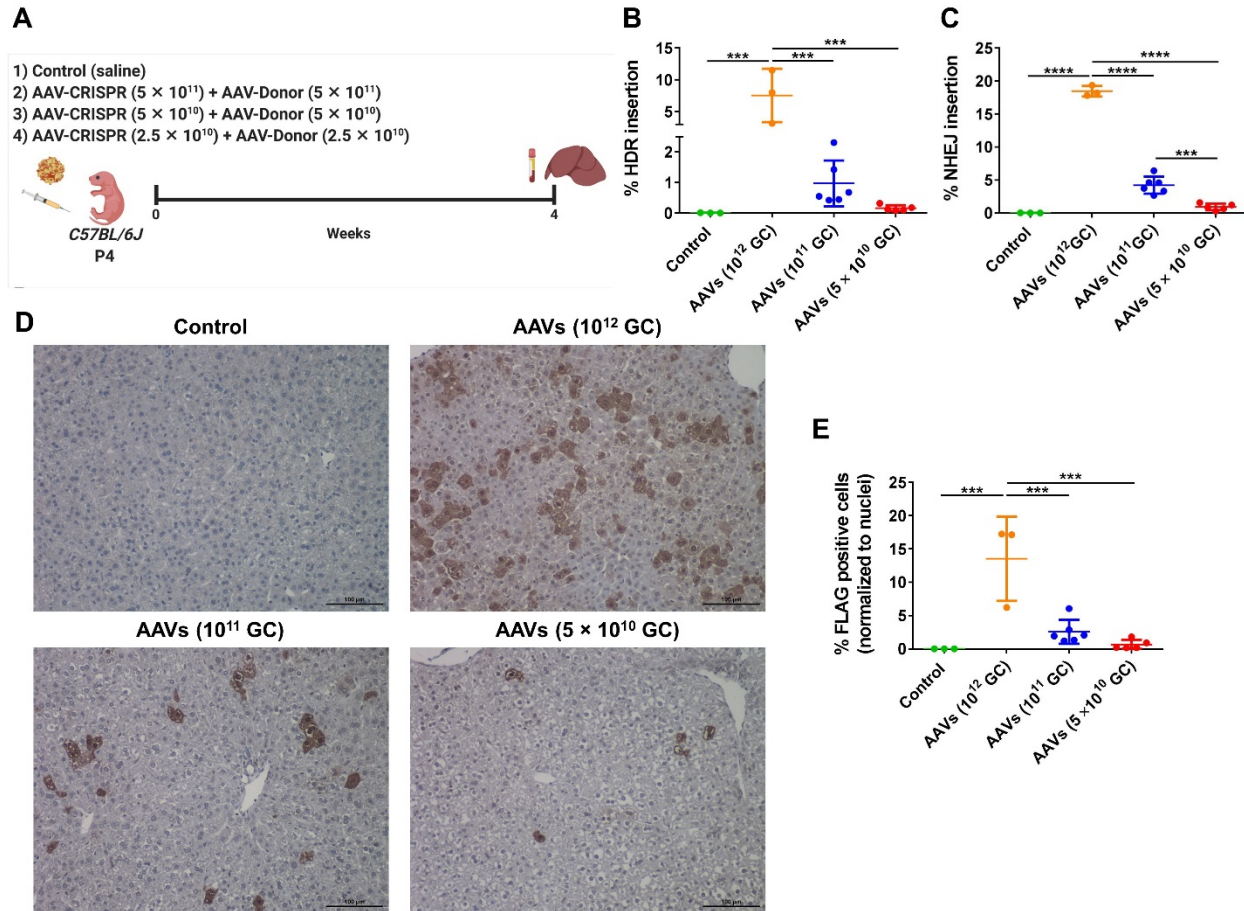

**Figure S12: Dose response study of *ApoA1* targeting in pups injected AAV-CRISPR + AAV-Donor.** (A) P4 *C57BL/6J* pups were subcutaneously injected with three doses of AAV-CRISPR and an AAV-Donor encoding mKate2 in a 1:1 molar ratio (total AAVs:  $10^{12}$ ,  $10^{11}$  or  $5 \times 10^{10}$  GC) or saline (control). Mice were sacrificed at 4 weeks of age and the liver was evaluated for the targeting at the *ApoA1* locus and the expression of mKate2. (B) Frequency of correct HDR targeting of AAV-Donor by ddPCR. (C) Frequency of *ApoA1* alleles with NHEJ insertions of AAV genomes by ddPCR. (D) Representative immunohistochemistry for mKate2-FLAG (brown cells) in *ApoA1*-targeted mice. Scale bar is 100  $\mu$ m. (E) Quantification of FLAG positive hepatocytes relative to total nuclei per field. Data are shown as mean  $\pm$  standard deviation (n=3 control mice, 3 mice injected with  $10^{12}$  GC, 6 mice injected with  $10^{11}$  GC and 5 mice injected with  $5 \times 10^{10}$  GC), with significance determined by One-way ANOVA followed by Tukey test. \*\*\* p<0.001, \*\*\*\* p<0.0001. (A) created with BioRender.

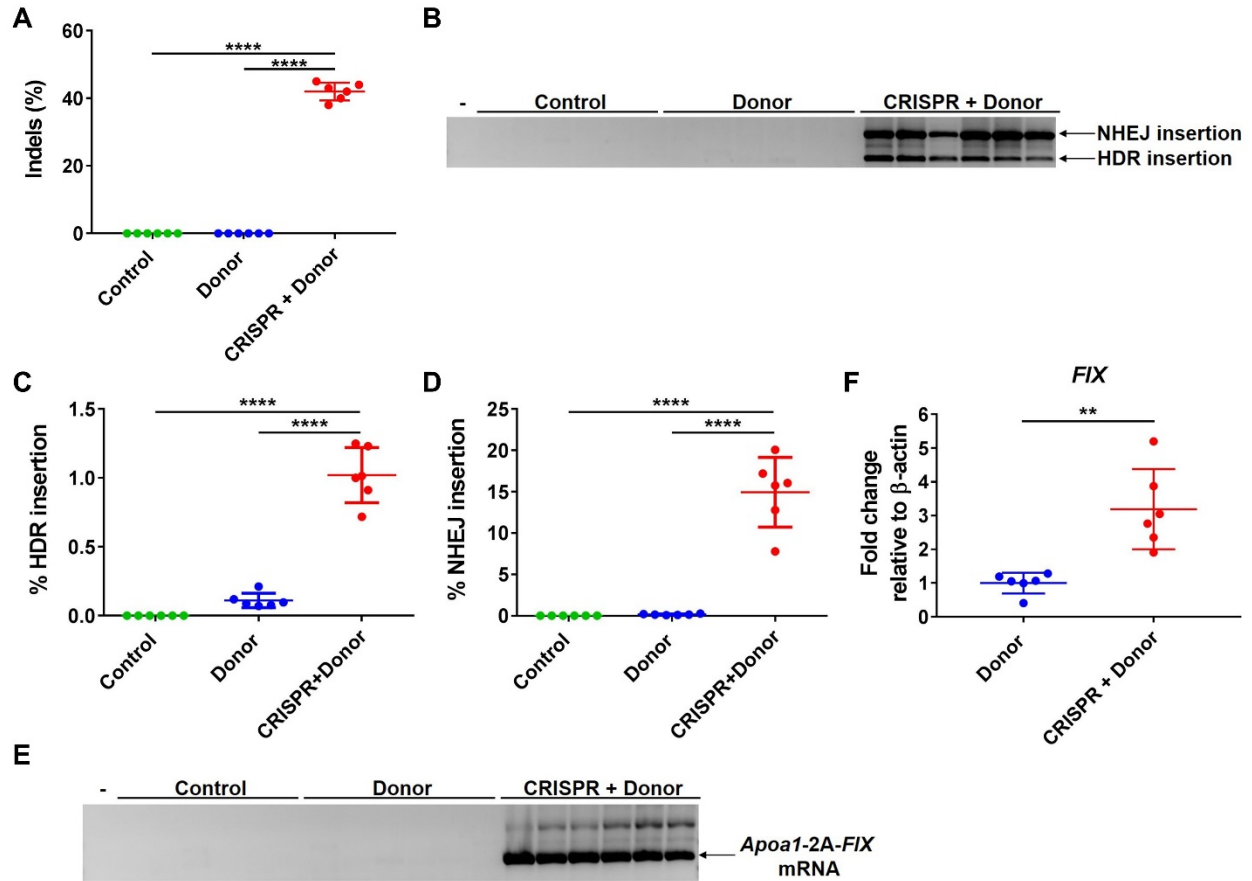

**Figure S13: Specific AAV-Donor integration in the 3'UTR of *ApoA1* in livers from C57BL/6J mice.** (A) Rate of indel formation in the 3'UTR of *ApoA1* by ICE analysis. (B) Integration PCR on liver DNA showed two main products corresponding to HDR (941 bp) and NHEJ (1866 bp) insertion of AAV-Donor in the *ApoA1* cut site. Minus (-) indicates a water only PCR control. (C) Frequency of HDR targeting of AAV-Donor by ddPCR. (D) Frequency of *ApoA1* alleles with NHEJ insertions of AAV genomes by ddPCR. (E) Detection of the bicistronic *ApoA1-2A-FIX* mRNA (724 bp) by end point PCR on cDNA. Minus (-) indicates a water only PCR control. (F) qPCR analysis of *FIX* expression in livers from Donor and CRISPR + Donor mice. qPCR data are expressed as fold change relative to  $\beta$ -Actin. Data are shown as mean  $\pm$  standard deviation (n=6). One-way ANOVA followed by Tukey test in panels A, C and D. Two-tailed Student's t-test in panel F. \*\*p<0.01, \*\*\*\* p<0.0001.

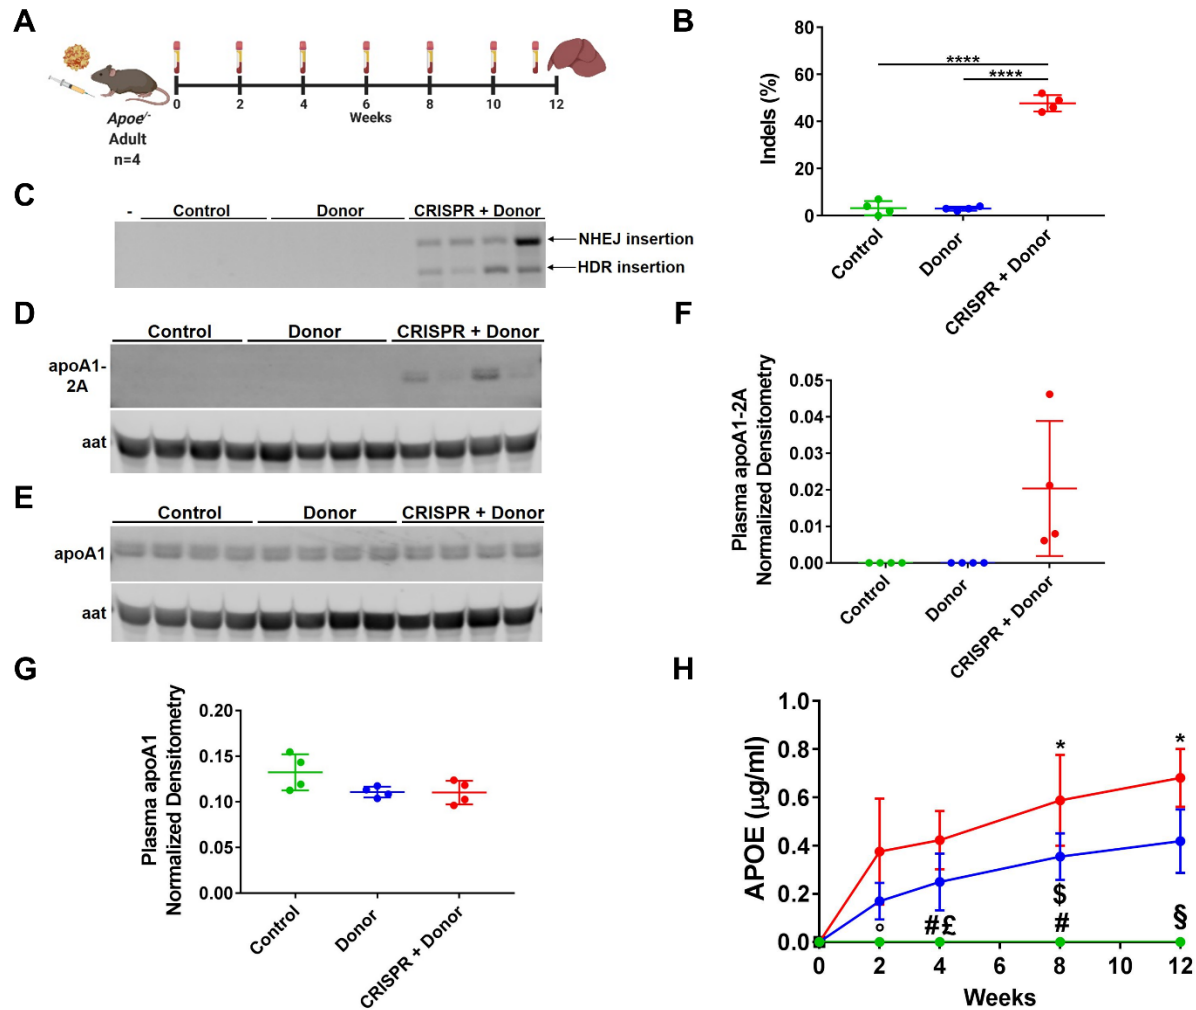

**Figure S14: Efficient expression of a secreted therapeutic protein from the *ApoA1* locus.** (A) Adult *Apoe*<sup>-/-</sup> mice were intraperitoneally injected with AAV-CRISPR ( $5 \times 10^{11}$  GC) and/or an AAV-Donor ( $5 \times 10^{11}$  GC) encoding the human *APOE* gene. Control mice were injected with AAV-GFP ( $5 \times 10^{11}$  GC). Plasma was collected every two weeks up to 12 weeks post-injection for analysis of human APOE protein. (B) Rate of indel formation in the 3'UTR of *ApoA1* by ICE analysis. (C) Integration PCR on liver DNA showed two main products corresponding to HDR (1289 bp) and NHEJ (2213 bp) insertion of AAV-Donor in the *ApoA1* cut site. Minus (-) indicates a water only PCR control. Western blot analysis of 2A-tagged apoA1 (D) and total apoA1 (E) in plasma isolated at 12 weeks post-injection, with aat as loading control. Densitometry analysis of apoA1-2A (F) and apoA1 (G) relative to aat loading control. (H) Quantitative measurement of plasma APOE over time by ELISA. Green line: control; Blue line: Donor; Red line: CRISPR + Donor mice. Data are shown as mean  $\pm$  standard deviation (n=4). A one-way ANOVA followed by Tukey test was used for determining significance in panels B, F and G. A two-way ANOVA followed by Tukey test was used for determining significance in panel H. \*\*\*\* p<0.0001, \* p<0.05 CRISPR + Donor vs Donor, ° p<0.001 Control vs CRISPR + Donor, # p<0.0001 Control vs CRISPR + Donor, £ p<0.05 Control vs Donor, \$ p<0.001 Control vs Donor, § p<0.0001 Control vs Donor and CRISPR + Donor. (A) created with BioRender.

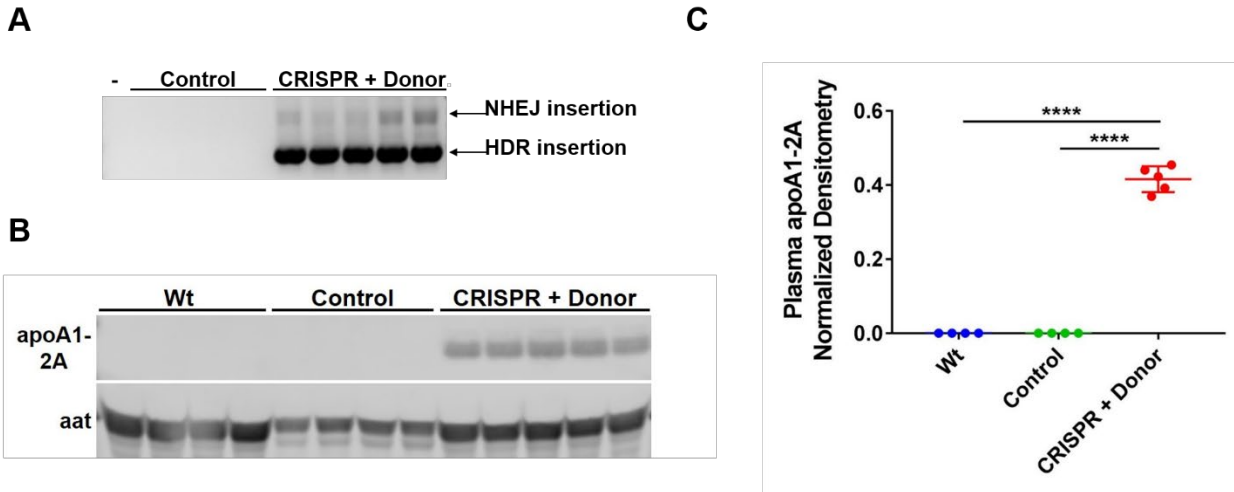

**Figure S15: Enrichment of HDR-mediated integrations of AAV-Donor in the *ApoA1* locus in livers from *Fah*<sup>-/-</sup> mice.** (A) Integration PCR on liver DNA showed mostly the HDR (886 bp) insertion rather than the NHEJ (1810 bp) insertion of AAV-Donor in the *ApoA1* cut site. Minus (-) indicates a water only PCR control. (B) Western blot analysis of 2A-tagged apoA1 in plasma isolated at endpoint, with aat as loading control. (C) Densitometry analysis of apoA1-2A relative to aat loading control. Wild type (Wt) indicates plasma samples from *C57BL/6J* mice as a control for physiological levels of aat. Control mice showed lower levels of plasma aat likely due to the severe liver damage. Data are shown as mean ± standard deviation (n=4 Wt and Control, 5 CRISPR + Donor). A one-way ANOVA followed by Tukey test was used for determining significance. \*\*\*\* p<0.0001.



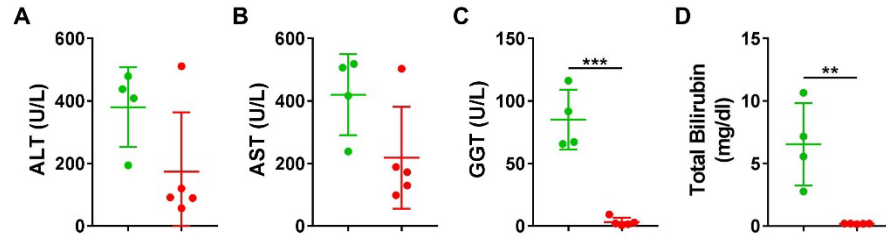

**Figure S16: Rescue of liver toxicity in *ApoA1*-targeted *Fah*<sup>-/-</sup> mice.** (A) ALT, (B) AST, (C) GGT and (D) total bilirubin levels in plasma of *ApoA1*-targeted mice. Green dots: control; Red dots: CRISPR + Donor mice. Data are shown as mean ± standard deviation (n=4 control and 5 CRISPR + Donor mice). \*\* p<0.01, \*\*\* p<0.001 by two-tailed Student's t-test.

**A**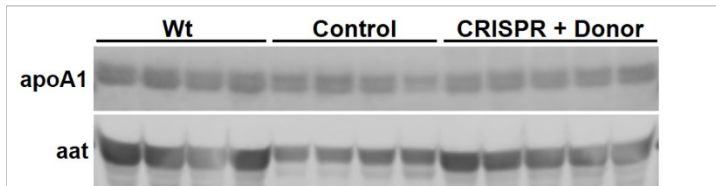**B**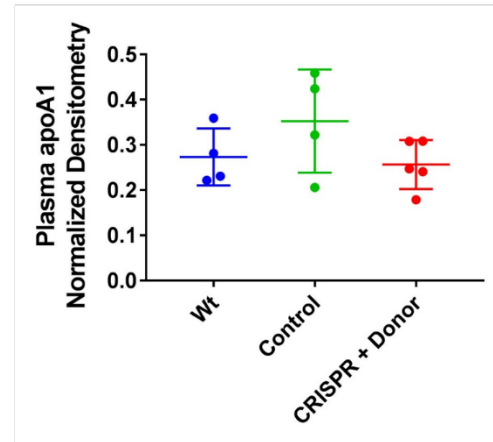

**Figure S17: High rates of *Apoa1* targeting does not impact endogenous apoA1 levels.** (A) Western blot analysis of total apoA1 in plasma isolated at endpoint, with aat as loading control. (B) Densitometry analysis of apoA1 relative to aat loading control. Wild type (Wt) indicates plasma samples from *C57BL/6J* mice as a control for physiological levels of apoA1 and aat. Control mice showed lower levels of plasma aat likely due to the severe liver damage. Data are shown as mean  $\pm$  standard deviation (n=4 Wt and Control, 5 CRISPR + Donor). A one-way ANOVA followed by Tukey test did not reveal significant differences in apoA1 levels among groups.

**Table S1: On- and off-target (OT) indel formation analysis by deep sequencing.**

Available as Excel File.

**Table S2: ChIP-seq and ATAC-seq details.**

| <b>NAME</b>          | <b>DESCRIPTION</b>  | <b>BIOSAMPLE_DESCRIPTION</b>                                        | <b>GENOME</b> | <b>ANTIBODY</b>    | <b>EXPERIMENT_ACCESSION</b> | <b>BIOSAMPLE_ACCESSION</b> | <b>FILE_ACCESSION</b>      | <b>FILE_TYPE</b> | <b>PROCESSING_PIPELINE</b> |
|----------------------|---------------------|---------------------------------------------------------------------|---------------|--------------------|-----------------------------|----------------------------|----------------------------|------------------|----------------------------|
| MOUSE_LIVER_H3K27AC  | H3K27ac ChIP-seq    | 1 million hepatocytes extracted from 8 week old C57BL/6 mouse liver | mm10          | Abcam 4729         | NCBI GEO GSE152993          | N/A                        | N/A                        | FASTQ (SE)       | Aquas ChIP-seq             |
| MOUSE_LIVER_RNA_POL2 | RNA Pol II ChIP-seq | Mus musculus strain B6NCrl male adult (8 weeks) liver tissue        | mm10          | Covance MMS-126R   | ENCODE ENCSR000 CBR         | ENCB S337E NC              | ENCFF0 01LNH               | FASTQ (SE)       | Aquas ChIP-seq             |
| MOUSE_LIVER_ATAC     | ATAC-seq            | Liver from pooled postnatal 0 day mice                              | mm10          | N/A                | ENCODE ENCSR609 OHJ         | ENCB S559 AAA              | ENCFF9 57VLH, ENCFF9 99IJT | FASTQ (PE)       | RIESLING                   |
| HUMAN_LIVER_H3K27AC  | H3K27ac ChIP-seq    | Homo sapiens female adult (53 years) right lobe of liver tissue     | hg38          | Active Motif 39133 | ENCODE ENCSR981 UJA         | ENCB S536T HV              | ENCFF9 31EZZ               | FASTQ (SE)       | Aquas ChIP-seq             |
| HUMAN_LIVER_RNA_POL2 | RNA Pol II ChIP-seq | Homo sapiens right lobe of liver female adult (53 years)            | hg38          | Biolegend 920102   | ENCODE ENCSR415 MOW         | ENCB S904 HZU              | ENCFF1 74GER, ENCFF0 71CTT | FASTQ (PE)       | Aquas ChIP-seq             |
| HUMAN_LIVER_ATAC     | ATAC-seq            | Homo sapiens right lobe of liver female adult (53 years)            | hg38          | N/A                | ENCODE ENCSR373 TDL         | ENCB S904 HZU              | ENCFF0 35UUL, ENCFF2 59ZLS | FASTQ (PE)       | RIESLING                   |

**Table S3: Primer list.**

| Name         | Sequence (5' to 3')                         | Purpose                         |
|--------------|---------------------------------------------|---------------------------------|
| WRL_0066     | GTACTACGAGGAAACCGGGAAC                      | AAV titer SaCas9 Fw             |
| WRL_0068     | GTTGTTGTAGAAGGAGGCGATAAAC                   | AAV titer SaCas9 Rv             |
| WRL_0200     | CACATGGGAGAGAGTCACCACATAC                   | AAV titer mKate2 Fw             |
| WRL_0201     | CCACGAGCTTCAGGGCCATG                        | AAV titer mKate2 Rv             |
| EYFP_For2    | GCATCGACTTCAAGGAGGAC                        | AAV titer EGFP Fw               |
| EGFP_Rev2    | TGCACGCTGCCGTCCTCGATG                       | AAV titer EGFP Rv               |
| MDG_0046     | GGTCGCTTTTGGGATTACCT                        | AAV titer <i>APOE</i> Fw        |
| MDG_0047     | TTCCTCCAGTTCCGATTTGT                        | AAV titer <i>APOE</i> Rv        |
| MDG_0054     | ATGCATTCTGTGGAGGCTCT                        | AAV titer <i>FIX</i> Fw         |
| MDG_0056     | GCTGATCTCCCTTTGTGGAAG                       | AAV titer <i>FIX</i> Rv         |
| WRL_0397:    | CCACTCTGTCAACGGCTGCAAC                      | AAV titer <i>FAH</i> Fw         |
| SynPARRevSeq | CACACAAAAAACCAACACACAGATCTAATG              | AAV titer <i>FAH</i> Rv         |
| MDG_0040     | TGAGTGCCAAATCCCTTTTC                        | Integration PCR <i>Apoa1</i> Fw |
| WRL_0047     | GCCCTCGACCGCCTTGATTC                        | Integration PCR mKate2 Rv       |
| MDG_0047     | TTCCTCCAGTTCCGATTTGT                        | Integration PCR <i>APOE</i> Rv  |
| MDG_0168     | GGCTCCGCTTCTCTAGACT                         | Integration PCR 2A Rv           |
| MDG_0098     | TCTACAGTCCGACGATCAACCCACCTGAAGACACTTGG      | <i>Apoa1</i> deep seq Fw        |
| MDG_0099     | GACGTGTGCTCTTCCGATCTGTTCTCACGTCCCTTGATG     | <i>Apoa1</i> deep seq Rv        |
| MDG_0100     | TCTACAGTCCGACGATCACTCCCCATCATATACACTTCC     | OT1 deep seq Fw                 |
| MDG_0101     | GACGTGTGCTCTTCCGATCGACAGGTACCCAAACAGACCTT   | OT1 deep seq Rv                 |
| MDG_0102     | TCTACAGTCCGACGATCAGGAGTGCATCCGTTATGGAG      | OT2 deep seq Fw                 |
| MDG_0103     | GACGTGTGCTCTTCCGATCTGCACATGAGAGCACTTGAA     | OT2 deep seq Rv                 |
| MDG_0104     | TCTACAGTCCGACGATCACTTGGGAGAGGTGACCAGAC      | OT3 deep seq Fw                 |
| MDG_0105     | GACGTGTGCTCTTCCGATCTCTAACAGGCATCGGACCTT     | OT3 deep seq Rv                 |
| MDG_0106     | TCTACAGTCCGACGATCACTATGGGGTGGCTGCTCTTA      | OT4 deep seq Fw                 |
| MDG_0107     | GACGTGTGCTCTTCCGATCTGAGGTTAATTGGGGTTCCA     | OT4 deep seq Rv                 |
| MDG_0108     | TCTACAGTCCGACGATCAAGGGTAACATGGGTGGTGAA      | OT5 deep seq Fw                 |
| MDG_0109     | GACGTGTGCTCTTCCGATCCCGATCTGCAATCTGACTA      | OT5 deep seq Rv                 |
| MDG_0110     | TCTACAGTCCGACGATCATGTGCATGCTGAGTGAATGA      | OT6 deep seq Fw                 |
| MDG_0111     | GACGTGTGCTCTTCCGATCGGAGCCAGCTATTCTGCAAC     | OT6 deep seq Rv                 |
| MDG_0112     | TCTACAGTCCGACGATCAACAAGTAAAAATCAGTGAAGACCT  | OT7 deep seq Fw                 |
| MDG_0113     | GACGTGTGCTCTTCCGATCTGCTAGAAACTGTCATGAGAGGAC | OT7 deep seq Rv                 |
| MDG_0114     | TCTACAGTCCGACGATCACCAGAGAGAAGGAGGGAATCTT    | OT8 deep seq Fw                 |
| MDG_0115     | GACGTGTGCTCTTCCGATCCGATGGAACCTTTTAGACAAC    | OT8 deep seq Rv                 |
| MDG_0118     | TCTACAGTCCGACGATCATCAACTACACTTTGGTTCTTCT    | OT10 deep seq Fw                |
| MDG_0119     | GACGTGTGCTCTTCCGATCAAATGAAAACCATCGAGGAAGA   | OT10 deep seq Rv                |
| MDG_0120     | TCTACAGTCCGACGATCATTGCTGAGTCATTTCTCTGTTG    | OT11 deep seq Fw                |
| MDG_0121     | GACGTGTGCTCTTCCGATCGCATTGAGGATCTTTTGC       | OT11 deep seq Rv                |
| MDG_0122     | TCTACAGTCCGACGATCACACCTGATCAGCAACAAAGTGT    | OT12 deep seq Fw                |
| MDG_0123     | GACGTGTGCTCTTCCGATCGCTCACTCTGTTTCTCTCCAAC   | OT12 deep seq Rv                |
| MDG_0126     | TCTACAGTCCGACGATCAACCTTCTGCTAGCCTCCTTTCT    | OT14 deep seq Fw                |
| MDG_0127     | GACGTGTGCTCTTCCGATCTATCGAGTGGTCCAATCTTGTG   | OT14 deep seq Rv                |
| MDG_0128     | TCTACAGTCCGACGATCACATTTGCGTGCATACCTGTAGT    | OT15 deep seq Fw                |
| MDG_0129     | GACGTGTGCTCTTCCGATCTAAGCAAAAACAAGCCAGATTCA  | OT15 deep seq Rv                |
| P5_1         | CTGATCGT                                    | Deep seq P5 barcode Fw          |
| P5_2         | ACTCTCGA                                    | Deep seq P5 barcode Fw          |
| P5_3         | TGAGCTAG                                    | Deep seq P5 barcode Fw          |
| P5_4         | GAGACGAT                                    | Deep seq P5 barcode Fw          |
| P5_5         | CTTGTCGA                                    | Deep seq P5 barcode Fw          |
| P7_1         | CACTCACG                                    | Deep seq P7 barcode Rv          |
| P7_2         | ACACGATC                                    | Deep seq P7 barcode Rv          |

|             |                       |                                |
|-------------|-----------------------|--------------------------------|
| P7_3        | TATCTGAC              | Deep seq P7 barcode Rv         |
| P7_4        | CACGTCGT              | Deep seq P7 barcode Rv         |
| P7_5        | TAGCGACG              | Deep seq P7 barcode Rv         |
| P7_6        | AGCTCTAG              | Deep seq P7 barcode Rv         |
| P7_7        | ACTAGAGC              | Deep seq P7 barcode Rv         |
| P7_8        | CGTACGCA              | Deep seq P7 barcode Rv         |
| P7_9        | CTACACTA              | Deep seq P7 barcode Rv         |
| P7_10       | TGCTGCTT              | Deep seq P7 barcode Rv         |
| P7_11       | TCACGCGT              | Deep seq P7 barcode Rv         |
| P7_12       | GTAGATCG              | Deep seq P7 barcode Rv         |
| P7_13       | GTGACGCA              | Deep seq P7 barcode Rv         |
| P7_14       | CATACTAG              | Deep seq P7 barcode Rv         |
| P7_15       | AGTGTAGA              | Deep seq P7 barcode Rv         |
| P7_16       | CGAGAGTT              | Deep seq P7 barcode Rv         |
| P7_17       | GACATAGT              | Deep seq P7 barcode Rv         |
| P7_18       | ACGCTACT              | Deep seq P7 barcode Rv         |
| P7_19       | ACTCACTG              | Deep seq P7 barcode Rv         |
| P7_20       | TGAGTACG              | Deep seq P7 barcode Rv         |
| MDG_025a    | AAACAGAAGGTGCAGCCCTA  | <i>Apo1</i> ICE Fw             |
| MDG_025b    | CTCGGCTAGCACAAAGAAACC | <i>Apo1</i> ICE Rv             |
| MDG_0150    | AGGGAAGGCAGTGAGTTAGA  | ddPCR HDR and ddPCR NHEJ Fw    |
| MDG_0202    | CGGGATTCTCTTCGACATCC  | ddPCR HDR Rv                   |
| MDG_0162    | AGCGCGCGCCAGAAGCTGCA  | ddPCR HDR and ddPCR NHEJ probe |
| MDG_0151    | GATAAGTAGCATGGCGGGTT  | ddPCR NHEJ Rv                  |
| MDG_0158    | GCTGAGCTTATCAGTCTCCC  | ddPCR Ref Fw                   |
| MDG_0159    | GAAGGCACCAAGAACACAGA  | ddPCR Ref Rv                   |
| MDG_0163    | AGCCCAGCCCCTGCCACACA  | ddPCR Ref probe                |
| MDG_0130    | TATGTGGATGCGGTCAAAGA  | <i>Apo1</i> qPCR Fw            |
| MDG_0131    | ACGGTTGAACCCAGAGTGTC  | <i>Apo1</i> qPCR Rv            |
| MDG_0132    | TACAGGGCTACATGGAACAA  | <i>Apoc3</i> qPCR Fw           |
| MDG_0133    | TCGGACTCCTGCACGCTACTT | <i>Apoc3</i> qPCR Rv           |
| MDG_0134    | ACCCAGCTAAGCAACAATGC  | <i>Apoa4</i> qPCR Fw           |
| MDG_0135    | TAGCATCCCCAAGTTTGTCC  | <i>Apoa4</i> qPCR Rv           |
| MDG_0136    | GGCTGCAGTCATCACTTGG   | <i>Apoa5</i> qPCR Fw           |
| MDG_0137    | GGCTGAAGTAGTCCCAGAGG  | <i>Apoa5</i> qPCR Rv           |
| MDG_0138    | GACTCTGCCACCACAAGGAT  | <i>Zpr1</i> qPCR Fw            |
| MDG_0139    | ACGGCTGATGAGTCCTTCAA  | <i>Zpr1</i> qPCR Rv            |
| MDG_0140    | GCAAAGGCTCATTTTGAAGC  | <i>Bud13</i> qPCR Fw           |
| MDG_0141    | CTGAATCAGAGGCTTTTTGG  | <i>Bud13</i> qPCR Rv           |
| MDG_0142    | GCTAGCGGAGGGGAGATATT  | <i>Sik3</i> qPCR Fw            |
| MDG_0143    | TTTGAACTTCCGTCGAGCTT  | <i>Sik3</i> qPCR Rv            |
| mActb RT F1 | TTGGGTATGGAATCCTGTGG  | <i>Bact</i> qPCR Fw            |
| mActb RT R1 | CTTCTGCATCCTGTCAGCAA  | <i>Bact</i> qPCR Rv            |
| MDG_0203    | ATTTGCTAATGTGTATGTG   | bicistronic mRNA PCR Fw        |
| MDG_0204    | TTCAACAGGGAGAAGTTAGT  | bicistronic mRNA PCR Rv        |
| MDG_0230    | TCACTCAAAGCACCCAATCA  | <i>FLX</i> qPCR Fw             |
| MDG_0231    | GGGCAGCAGTTACAATCCAT  | <i>FLX</i> qPCR Rv             |
