# Supplementary material for: Targeting the Apoa1 locus for liver-directed gene therapy
Source: PubMed Central journal article supplement — Mol Ther Methods Clin Dev. 2021 Apr 24;21:656–69. doi: 10.1016/j.omtm.2021.04.011 (PMC8166646; doi:10.1016/j.omtm.2021.04.011), 2021-04-24
Supplement: mmc3.pdf [file mmc3.pdf]

# Targeting the *Apoa1* locus for liver-directed gene therapy

Marco De Giorgi,<sup>1</sup> Ang Li,<sup>2</sup> Ayrea Hurley,<sup>1</sup> Mercedes Barzi,<sup>3</sup> Alexandria M. Doerfler,<sup>1</sup> Nikitha A. Cherayil,<sup>4</sup> Harrison E. Smith,<sup>4</sup> Jonathan D. Brown,<sup>5</sup> Charles Y. Lin,<sup>4,6,7</sup> Karl-Dimiter Bissig,<sup>3</sup> Gang Bao,<sup>2</sup> and William R. Lagor<sup>1</sup>

<sup>1</sup>Department of Molecular Physiology and Biophysics, Baylor College of Medicine, Houston, TX 77030, USA; <sup>2</sup>Department of Bioengineering, Rice University, Houston, TX 77030, USA; <sup>3</sup>Department of Pediatrics, Division of Medical Genetics, Duke University, Durham, NC 27710, USA; <sup>4</sup>Department of Molecular and Human Genetics, Baylor College of Medicine, Houston, TX 77030, USA; <sup>5</sup>Division of Cardiovascular Medicine, Vanderbilt University Medical Center, Nashville, TN 37232, USA; <sup>6</sup>Therapeutic Innovation Center, Department of Biochemistry and Molecular Biology, Baylor College of Medicine, Houston, TX 77030, USA

**Clinical application of somatic genome editing requires therapeutics that are generalizable to a broad range of patients. Targeted insertion of promoterless transgenes can ensure that edits are permanent and broadly applicable while minimizing risks of off-target integration. In the liver, the Albumin (*Alb*) locus is currently the only well-characterized site for promoterless transgene insertion. Here, we target the *Apoa1* locus with adeno-associated viral (AAV) delivery of CRISPR-Cas9 and achieve rates of 6% to 16% of targeted hepatocytes, with no evidence of toxicity. We further show that the endogenous *Apoa1* promoter can drive robust and sustained expression of therapeutic proteins, such as apolipoprotein E (*APOE*), dramatically reducing plasma lipids in a model of hypercholesterolemia. Finally, we demonstrate that *Apoa1*-targeted fumarylacetoacetate hydrolase (*FAH*) can correct and rescue the severe metabolic liver disease hereditary tyrosinemia type I. In summary, we identify and validate *Apoa1* as a novel integration site that supports durable transgene expression in the liver for gene therapy applications.**

## INTRODUCTION

There are at least 700 inherited metabolic disorders associated with the genetic loss of a specific liver function.<sup>1</sup> Liver-directed genome editing is an exciting and potentially curative strategy for these diseases. However, a clinically relevant genome-editing approach should be generalizable to many patients rather than mutation specific. In addition, the transgene sequence must be integrated safely into a well-defined site to ensure permanent expression, while avoiding adverse events. Identification of safe and effective integration sites in the liver is important for the field, as it will enable more streamlined deployment of gene-editing therapies.

Adeno-associated viral (AAV) vectors are a leading platform for gene therapy and somatic genome editing.<sup>2,3</sup> Recombinant AAVs are composed of a small, non-enveloped, protein capsid enclosing a single-stranded DNA genome flanked on either side by hairpin-like structures called inverted terminal repeats (ITRs). Following entry into the nucleus, the single-stranded AAV genome is converted to double-stranded episomes, circularized through the ITRs. AAV episomes provide strong and stable expression of transgenes.<sup>3</sup> However, since

episomes are generally not integrated into the host chromosome, they will be lost through cell death and division. Although hepatocyte turnover has not been well determined in humans, the average lifespan of a rodent hepatocyte is estimated to be between 200 and 400 days.<sup>4,5</sup> Likewise, preclinical models of liver-directed neonatal AAV gene therapy show only short-term effects.<sup>6–8</sup> Therefore, it is reasonable to predict that conventional AAV gene therapy may not provide lifelong correction of many liver disorders, especially in pediatric patients. Strategies are needed to capitalize on the high delivery efficiency of AAV, while ensuring that the therapeutic cargo is passed on to daughter cells.

Targeted integration of AAV transgenes is an attractive strategy that requires the identification of genomic sites, which can be modified safely and efficiently. Ideally, these sites should enable (1) access for the genomic modification machinery,<sup>9</sup> (2) robust and sustained expression from an endogenous promoter rather than introduction of an external promoter that may be silenced,<sup>10–14</sup> (3) no disruption or dysregulation of neighboring genes,<sup>15,16</sup> and (4) no induction of any malignancies or toxicity.<sup>17</sup> The Albumin (*Alb*) locus is currently the only site that has been characterized as a liver-specific platform for gene addition. Zinc finger nucleases (ZFN) have been used to insert several therapeutic transgenes at the *Alb* locus, including factor VIII (*FVIII*) and IX (*FIX*).<sup>18</sup> Barzel et al.<sup>19</sup> introduced the concept of “promoterless targeting” where an AAV vector was used to modify the 3' end of the *Alb* gene, referred to as GeneRide. *Alb* targeting has been applied successfully to a mouse model of Crigler-Najjar syndrome type I,<sup>20</sup> and the efficiency of this approach can be dramatically increased with CRISPR-Cas9.<sup>21</sup> Clinical trials are currently underway using AAV and ZFN targeting of the *ALB* locus to treat Mucopolysaccharidosis I and II (MPSI and II) and Hemophilia B (NCT02702115, NCT03041324, NCT02695160). However, progress reports from the MPSI and II clinical trials show low targeted expression levels of therapeutic transgene from the *ALB* locus.<sup>22</sup> Moreover, a

Received 13 November 2020; accepted 21 April 2021;  
<https://doi.org/10.1016/j.omtm.2021.04.011>.

<sup>7</sup>Present address: Kronos Bio, Cambridge, MA 02142, USA

**Correspondence:** William R. Lagor, PhD, Department of Molecular Physiology and Biophysics, Baylor College of Medicine, Houston, TX 77030, USA.

**E-mail:** [lagor@bcm.edu](mailto:lagor@bcm.edu)

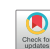

decrease of the plasma *Alb* levels has been reported following *Alb* targeting in several preclinical models.<sup>22,23</sup> Therefore, it remains to be determined whether *ALB* targeting will provide safe and durable correction, or if unexpected pathology will result. Recent data have identified *ALB* as one of the most commonly mutated genes in human hepatocellular carcinoma (HCC) biopsies<sup>24,25</sup> with mutations observed in 13% of tumors. It is currently unclear whether *ALB* mutations are passengers in HCC tumor growth or potentially causative. Despite recent evidence showing no HCC development up to 15 months following *Alb* targeting in mice,<sup>26</sup> the risk of unintended editing events in *ALB* in the setting of human gene therapy remains unknown. Therefore, there is a compelling need to explore additional targetable loci in the liver.

Apolipoprotein A1 (ApoA1) is the primary structural component of high-density lipoprotein (HDL) particles and is highly expressed by the liver. Here, we show that the locus is amenable to modification using AAV vectors for homology-directed repair (HDR), and that targeting efficiency is dramatically enhanced with CRISPR-Cas9 editing. Fusion of promoterless transgenes to the 3' end of the *Apoa1* gene supports sustained expression in the liver, without adverse consequences. Furthermore, *Apoa1* targeting supports the expression of secreted therapeutic proteins FIX and Apolipoprotein E (APOE), and enables correction of inherited metabolic disorders, such as hypercholesterolemia and hereditary tyrosinemia type I. Taken together, our work identifies and validates *Apoa1* as a therapeutically useful integration site for liver-directed genome editing.

## RESULTS

### High chromatin accessibility and expression of *Apoa1* in mouse and human liver

ApoA1 is the primary structural component of HDL particles and circulates in the bloodstream at concentrations > 1 mg/mL, making it one of the most abundant plasma proteins in humans.<sup>27</sup> The *Apoa1* gene is expressed in the liver and intestine, and the liver in particular is a major contributor to circulating apoA1 protein levels.<sup>28</sup> To determine the feasibility of targeting the *Apoa1* locus for expression of therapeutic transgenes from the liver, we performed chromatin immunoprecipitation-sequencing (ChIP-seq) for histone H3K27 acetylation and RNA polymerase II (RNA Pol II) binding, as well as assay for transposase-accessible chromatin (ATAC)-sequencing (Figure S1). The data showed strong evidence of high rates of transcription, as well as accessible chromatin at the *Apoa1* locus in both mouse and human liver tissue. The murine *Apoa1* gene had a stronger H3K27 acetylation and RNA Pol II signature than *Alb*, which is a popular target for liver-directed transgene insertion<sup>18–20</sup> (Figure S1A). ChIP-seq and ATAC-seq analysis on human liver also showed strong H3K27 acetylation and RNA Pol II binding, as well as chromatin accessibility for the human *APOA1* locus in comparison to *ALB* (Figure S1B), strongly supporting the candidacy of this site.

### Efficient targeting of the *Apoa1* locus for the expression of transgenic proteins *in vivo*

To target the *Apoa1* locus, we used AAV vectors based on serotype 8, to deliver the *Staphylococcus aureus* Cas9 (SaCas9) nuclease and

guide RNA (gRNA; AAV-CRISPR), along with a donor template for HDR (AAV-Donor). In order to avoid indels in the *Apoa1* coding sequence, we identified an efficient gRNA that cuts the 3' untranslated region (3' UTR) of *Apoa1* at 29 base pairs downstream of the termination codon (Figure S2). The AAV-Donor vector includes exon 4 of *Apoa1* followed by a 2A skipping peptide and the therapeutic transgene, flanked on each side by homology arms (Figure 1). Correct in-frame integration by HDR should result in removal of the endogenous stop codon, and transcription of a bicistronic mRNA driven by the endogenous *Apoa1* promoter. This mRNA should be translated into two proteins: apoA1 C-terminally tagged with 2A peptide and the therapeutic protein including an N-terminal proline (Figure 1).

We injected adult mice with AAV-CRISPR and/or an AAV-Donor encoding the far-red fluorescent protein mKate2 and examined expression at 12 weeks post-injection (Figure 2A). Two major integration events of AAV-Donor were observed by PCR: (1) HDR integration and (2) non-homologous end joining (NHEJ)-insertion of the AAV genome, including ITRs (Figure 2B). In addition to integration, SaCas9-cutting of the *Apoa1* 3' UTR generated indels with high frequencies of  $54.5\% \pm 2.5\%$  and  $51.5\% \pm 3.2\%$  in CRISPR and CRISPR + Donor livers, respectively (Figure 2C; Table S1). Editing appeared to be very specific, with no detectable off-target activity above background in any of the predicted sites examined (Figure S3; Table S1). We performed droplet digital PCR (ddPCR) to quantify the *Apoa1* alleles with NHEJ-insertion, using a primer specific to the ITRs present in both AAV vectors. We observed  $11.8\% \pm 5.5\%$  and  $11.8\% \pm 2.5\%$  NHEJ-insertion events in livers from CRISPR and CRISPR + Donor mice, respectively (Figure 2D). We were also able to detect correct HDR-insertion events of AAV-Donor with a frequency of  $1.8\% \pm 0.6\%$  in livers from CRISPR + Donor mice and  $0.3\% \pm 0.2\%$  in livers from Donor mice (Figure 2E). Immunohistochemistry revealed that  $0.35\% \pm 0.32\%$  of hepatocytes in Donor mice expressed the mKate2-FLAG transgene (Figures 2F and 2G), which increased dramatically to  $5.7\% \pm 2.9\%$  with the addition of AAV-CRISPR (Figures 2F, 2G, and S4). By western blot, we were able to detect mKate2-FLAG and 2A-tagged apoA1 only in CRISPR + Donor mice (Figures 2H, 2I, 2K, and 2L). Targeting the *Apoa1* locus did not adversely impact endogenous apoA1 protein levels (Figures 2J, 2M, and S5B) or expression of neighboring genes (Figure S5). Likewise, no liver toxicity or histopathological abnormalities were observed (Figures S6–S9).

### Improved expression of transgenic proteins from the *Apoa1* locus in mice injected at post-natal day 4

HDR occurs at very low rate in post-mitotic tissues such as the adult liver, where NHEJ is the preferred repair pathway.<sup>29</sup> In an attempt to take advantage of hepatocyte division during liver growth, we injected neonatal mice at post-natal day 4 (P4) with the same vectors and examined expression and integration 20 weeks later (Figure 3A). Relative to adult mice, there was a marked enhancement of HDR versus NHEJ-insertion of the AAV-Donor (Figure 3B versus 2B). The frequency of NHEJ insertion was  $17.4\% \pm 5\%$  and  $21.5\% \pm 8\%$  in CRISPR and CRISPR + Donor mice, respectively (Figure 3C).

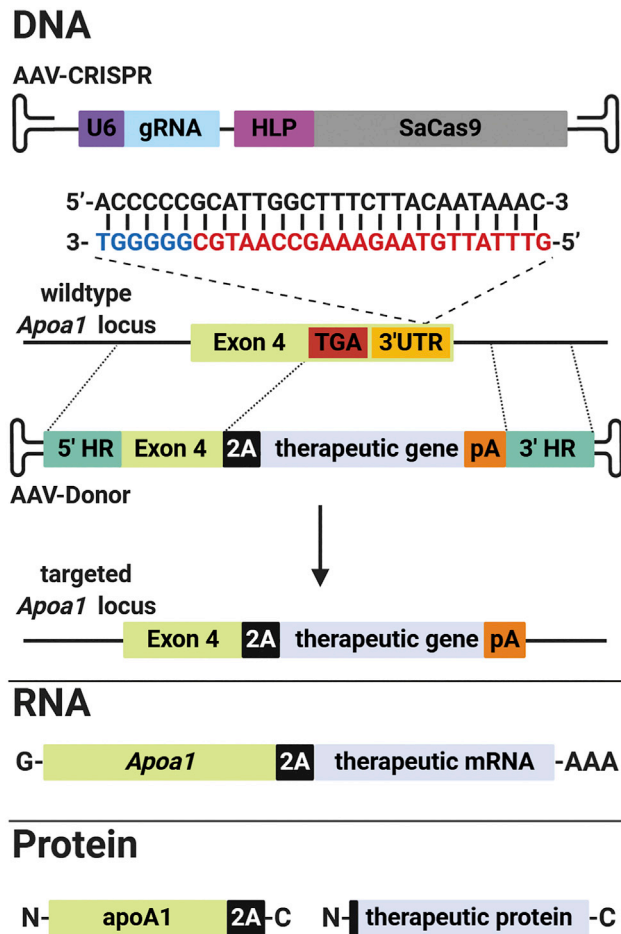

**Figure 1. Strategy for therapeutic targeting of the *Apoa1* locus for liver gene therapy**

AAV-CRISPR encodes a gRNA for targeting the *Apoa1* 3' UTR, and SaCas9 driven by a liver-specific promoter (HLP). The gRNA target site (red) and protospacer adjacent motif (PAM) sequence (blue) in the *Apoa1* 3' UTR are shown. AAV-Donor contains the final coding exon of *Apoa1* (exon 4) fused to a 2A ribosomal skipping sequence upstream of a therapeutic gene and synthetic polyadenylation signal (pA), flanked by homology arms (HR) to the *Apoa1* locus. Following correct integration by HDR, the *Apoa1* promoter drives the expression of a bicistronic mRNA consisting of *Apoa1* and therapeutic transgene. Translation results in expression of apoA1 with a C-terminal 2A epitope tag, as well as the therapeutic protein including an N-terminal proline. Created with BioRender.

The frequency of HDR events in CRISPR + Donor mice increased to  $7.8\% \pm 1.7\%$ , almost 8-fold compared with adult injected mice (Figure 3D). Donor mice showed a HDR frequency of  $0.1\% \pm 0.06\%$ . Indel formation was significantly lower in CRISPR + Donor than CRISPR mice ( $21.4\% \pm 3.6\%$  versus  $29.2\% \pm 0.4\%$ , Figure 3E). By immunohistochemistry, we observed only rare targeted hepatocytes in Donor-only treated mice,  $0.6\% \pm 0.1\%$  (Figures 3F and 3G), in contrast to numerous positive hepatocytes arranged in colonies in the CRISPR + Donor livers at  $16.4\% \pm 3.6\%$  (Figures 3F, 3G, and S10). The mKate2 protein and 2A-tagged apoA1 were readily detectable in CRISPR + Donor mice by western blot (Figures 3H, 3I, 3K, and 3L). Interest-

ingly, the increased targeting of *Apoa1* did not affect total apoA1 levels in plasma (Figures 3J and 3M). Moreover, in spite of the high rate of integration at the *Apoa1* locus we did not observe any histopathological abnormalities, toxicity, or tumor development (Figure S11). In order to investigate whether the greater proportion of targeted cells could be due to the higher AAV dose relative to body weight, we performed a dose-ranging experiment by injecting pups with several doses of AAV-CRISPR + AAV-Donor at a constant 1:1 molar ratio (Figure S12). We observed a dose-dependent decrease in the frequency of both HDR- ( $7.5\% \pm 4.2\%$ ,  $1\% \pm 0.7\%$  and  $0.2\% \pm 0.1\%$ ) and NHEJ-integration events ( $18.5\% \pm 0.8\%$ ,  $4.2\% \pm 1.3\%$ , and  $0.9\% \pm 0.5\%$ ) in pups injected with a total of  $10^{12}$ ,  $10^{11}$ , and  $5 \times 10^{10}$  GC of AAV, respectively (Figures S12B and S12C). Similarly, the frequency of mKate2-FLAG-positive hepatocytes correlated well with descending AAV doses at  $13.5\% \pm 6.3\%$ ,  $2.5\% \pm 1.8\%$ , and  $0.6\% \pm 0.7\%$  (Figures S12D and S12E). These data demonstrate a high efficiency of targeting and expression from the *Apoa1* locus in pups and that such effects are dose dependent.

#### Sustained expression of secreted therapeutic proteins

The liver is of particular interest for gene therapy, both for correcting inherited metabolic disorders and as a biofactory for secretion of therapeutic proteins. To test whether our *Apoa1* targeting strategy could support the secretion of a therapeutic protein, we constructed an AAV-Donor vector encoding human FIX, the clotting factor deficient in patients with hemophilia B (Figure 4A). We injected adult mice with AAV-Donor alone or in combination with AAV-CRISPR and collected plasma every 2 to 4 weeks up to 24 weeks post-injection (Figure 4B). As expected from previous experiments, we detected the 2A-tagged apoA1 only in plasma from CRISPR + Donor mice (Figures 4C and 4E), which showed editing and integration in the *Apoa1* locus (Figures S13A and S13B). Similar to the adult mice injected with the mKate2 Donor construct (Figure 2), CRISPR + Donor mice showed a frequency of  $1\% \pm 0.2\%$  and  $14.9\% \pm 4.2\%$  for HDR- and NHEJ-integration events at the *Apoa1* locus (Figures S13C and S13D). In Donor mice, the HDR frequency was around  $0.1\% \pm 0.05\%$  (Figure S13C). Despite this, we were able to detect the bicistronic mRNA using a primer binding the 2A sequence only in CRISPR + Donor mice (Figure S13E). No changes in apoA1 levels were observed following *Apoa1* targeting (Figures 4D and 4F). The production of FIX was constant and significantly higher in CRISPR + Donor than in Donor mice— $228 \pm 65.6$  versus  $139 \pm 22.8$  ng/mL at experimental endpoint (Figure 4G). Similarly, the expression of total FIX transgene mRNA was  $\sim 3$  fold higher in CRISPR + Donor as compared to Donor livers (Figure S13F). Together, these data show that the *Apoa1* locus can drive stable and sustained expression of therapeutically relevant secreted proteins.

#### Amelioration of hypercholesterolemia through *Apoa1* targeting

Next, we asked whether the *Apoa1*-targeted expression of a secreted protein could correct an inherited metabolic disorder. ApoE is a constituent of several lipoprotein classes and serves as a high-affinity ligand for the low-density lipoprotein receptor (LDLR). Mutations at the *APOE* gene have been associated with familial type III

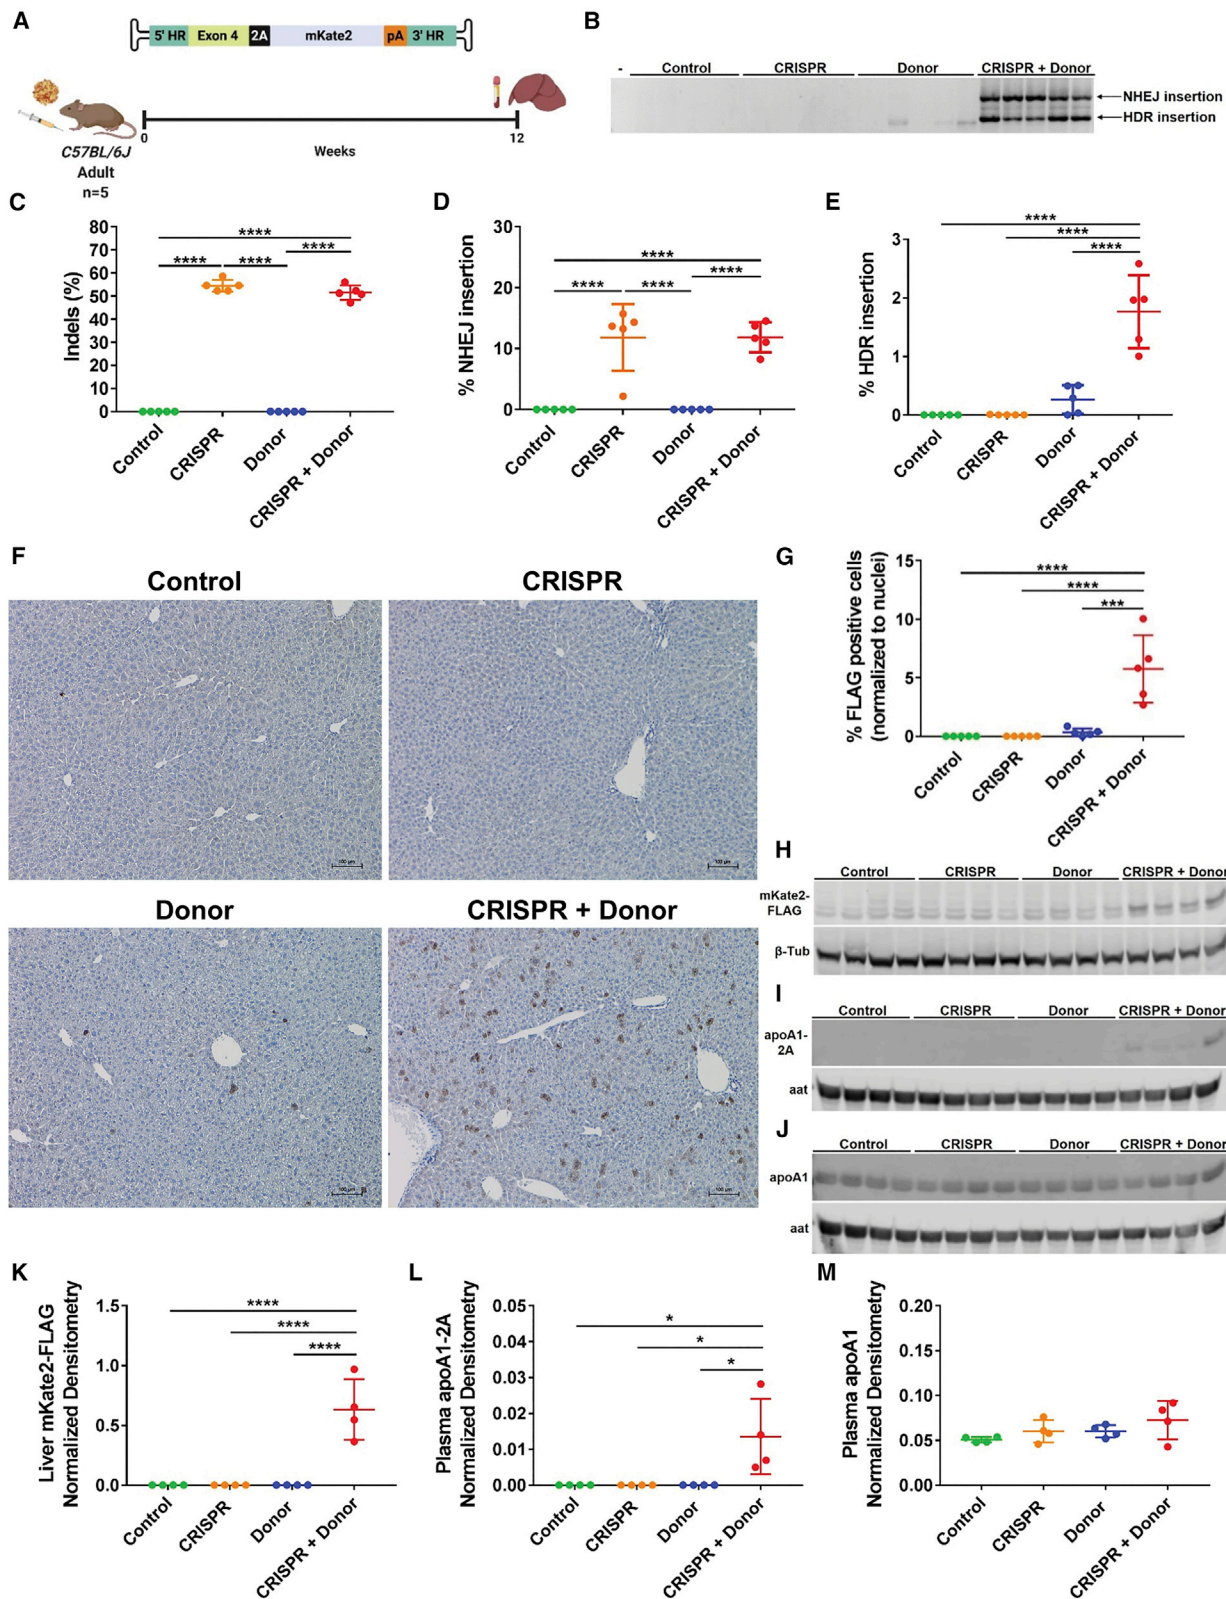

(legend on next page)

hyperlipoproteinemia. Similar to the phenotype observed in patients, *ApoE*<sup>-/-</sup> mice are deficient in clearing circulating apoB-containing lipoproteins, resulting in development of hypercholesterolemia and atherosclerosis upon high fat diet feeding.<sup>30</sup> First, we demonstrated the feasibility of targeting *Apoa1* with an AAV-Donor encoding human APOE in a small group of adult *ApoE*<sup>-/-</sup> mice (Figures 5A and S14). Then, we injected P4 *ApoE*<sup>-/-</sup> pups with AAV-CRISPR plus the AAV-Donor encoding human APOE (Figure 5A) or saline as control, and we fed mice with western diet starting at weaning for 20 weeks. We collected plasma samples every 2 to 4 weeks up to 23 weeks of age (Figure 5B). We detected a high proportion of correct HDR integration of the AAV-Donor in the *Apoa1* locus (Figure 5C), which resulted in secretion of apoA1-2A and APOE in plasma of CRISPR + Donor mice (Figures 5D, 5E, 5H, and 5I). While the endogenous levels of apoA1 did not vary between mice (Figures 5F and 5J), CRISPR + Donor mice showed less apoB-48 in plasma as compared to control mice (Figures 5G and 5K), consistent with enhanced clearance of apoB-containing lipoprotein particles via APOE. Control mice showed gradual and continuing accumulation of total cholesterol in plasma up to 1,325 ± 131 mg/dL (Figure 5L). On the contrary, CRISPR + Donor mice showed significantly lower levels of total cholesterol over time, which were reduced to about half relative to control mice (638 ± 58.7 mg/dL at endpoint, Figure 5L). Similarly, CRISPR + Donor mice showed significantly lower endpoint plasma triglycerides as compared to control mice (83.4 ± 7.8 versus 155.7 ± 20.5 mg/dL; Figure 5M). These data show that *Apoa1*-targeted expression of APOE can dramatically reduce hypercholesterolemia.

### Correction of a lethal metabolic liver disorder through *Apoa1* targeting

We next sought to determine whether targeted integration at the *Apoa1* locus could correct a lethal metabolic liver disease. Fumarylacetoacetate hydrolase (FAH) catalyzes the final step of tyrosine catabolism and its deficiency results in the accumulation of toxic catabolites, leading to liver and kidney failure in hereditary tyrosinemia type I (HT-I). Liver and kidney pathology can be averted by supplying 2-[2-nitro-4-trifluoromethylbenzoyl]-1,3-cyclohexanedione (NTBC), which blocks the pathway upstream.<sup>31</sup> *Fah*<sup>-/-</sup> mice were maintained on NTBC and then injected with either saline (control) or AAV-CRISPR plus an AAV-Donor encoding a human *FAH* transgene. NTBC was removed from both groups, which were then followed for 40 days (Figure 6A). Control mice showed a rapid loss of body weight reflecting the

dehydration associated with kidney disease starting at days 12–15 and met the humane endpoint for euthanasia of >20% body weight loss between 23 and 29 days (Figures 6B and 6C). In contrast, the CRISPR + Donor mice showed only a transient decrease in body weight around day 20, after which time the animals fully recovered (Figures 6B and 6C). Integration analysis by PCR showed a strong enrichment for HDR-modified *Apoa1* alleles versus NHEJ insertion (Figure S15A). FAH protein levels were restored to ~50% (Figure 6D), along with high levels of 2A-tagged apoA1 in the plasma (Figures S15B and S15C). Control livers showed no FAH staining and a histopathology typical of HT-I including enlarged hepatocytes, vacuolation, and immune cell infiltration (Figure 6E). Liver function was restored in the CRISPR + Donor mice based on improvements in blood chemistry (Figure S16) and liver morphology (Figure 6F). As a sign of integration, expression and function of the *Apoa1*-targeted *FAH*, the corrected hepatocytes can clonally expand in this disease model (Figure 6F). Despite the high rate of *Apoa1* targeting and expansion of targeted cells, CRISPR + Donor mice showed unaffected levels of plasma apoA1 (Figure S17). These data show that *Apoa1*-targeting enables correction of a severe metabolic liver disorder.

### DISCUSSION

Here, we identify the *Apoa1* locus as a useful targeted integration site for liver-directed genome engineering. *Apoa1* is highly transcriptionally active with accessible chromatin in both mouse and human livers. We show that the 3' UTR of *Apoa1* can be efficiently targeted with AAV-CRISPR, achieving correct HDR in up to ~8% of the *Apoa1* alleles. Furthermore, the endogenous *Apoa1* promoter drives robust and sustained expression of several therapeutic proteins. Most importantly, we demonstrate functionality and correction of metabolic liver diseases using the *Apoa1* locus.

Promoterless transgenes have been efficiently targeted to the *Alb* locus by using ZFN, CRISPR-Cas9, or without nucleases.<sup>18–23</sup> However, mutations in the *ALB* gene have been found in two independent cohorts of human HCC with a frequency of 13%.<sup>24,25</sup> The role of these mutations in HCC susceptibility and pathology is not clear but raises questions about the long-term safety of this approach. Moreover, a slight decrease of plasma Alb levels has been recently reported following *Alb* targeting in preclinical models.<sup>22,23</sup> To the best of our knowledge, mutations in the *Apoa1* locus are not enriched in human HCC, nor have they been associated with cancer risk. Furthermore,

### Figure 2. Targeted integration and expression from the *Apoa1* locus *in vivo*

(A) Adult *C57BL/6J* mice were intraperitoneally injected with AAV-CRISPR ( $5 \times 10^{11}$  GC) and/or an AAV-Donor template ( $5 \times 10^{11}$  GC) encoding a far-red fluorescent protein (mKate2). Control mice were injected with AAV-GFP ( $5 \times 10^{11}$  GC). Livers and plasma were harvested for analysis at 12 weeks post-injection. (B) PCR from liver showing integration of AAV-Donor into the *Apoa1* locus. Two main products were observed: correct HDR (1,139 bp) and NHEJ insertion (2,031 bp). The forward primer binds to the *Apoa1* locus upstream of the 5' HR and reverse primer binds to the mKate2 coding sequence. Minus (-) indicates water-only control. (C) Frequency of indel formation in the *Apoa1* 3' UTR by deep sequencing. (D) Frequency of *Apoa1* alleles with NHEJ insertions of AAV genomes by ddPCR. (E) Frequency of correct HDR targeting of AAV-Donor by ddPCR. (F) Representative immunohistochemistry for mKate2-FLAG (brown cells) in *Apoa1*-targeted mice. Scale bar is 100  $\mu$ m. (G) Quantification of FLAG positive hepatocytes relative to total nuclei per field. (H) Western blot of mKate2-FLAG in liver lysates with  $\beta$ -tubulin ( $\beta$ -tub) as a loading control. (I and J) Western blot analysis of 2A-tagged (I) and total apoA1 (J) in plasma with alpha-1 antitrypsin (aat) as loading control. Four representative mice per group are shown in western blots. (K) Densitometry analysis of mKate2-FLAG in liver lysates relative to  $\beta$ -tub loading control. Densitometry analysis of apoA1-2A (L) and apoA1 (M) in plasma relative to aat loading control. Data are shown as mean ± standard deviation (n = 5; n = 4 in densitometry analyses), with significance determined by one-way ANOVA followed by Tukey test. \*p < 0.05, \*\*\*p < 0.001, \*\*\*\*p < 0.0001. (A) Created with BioRender.

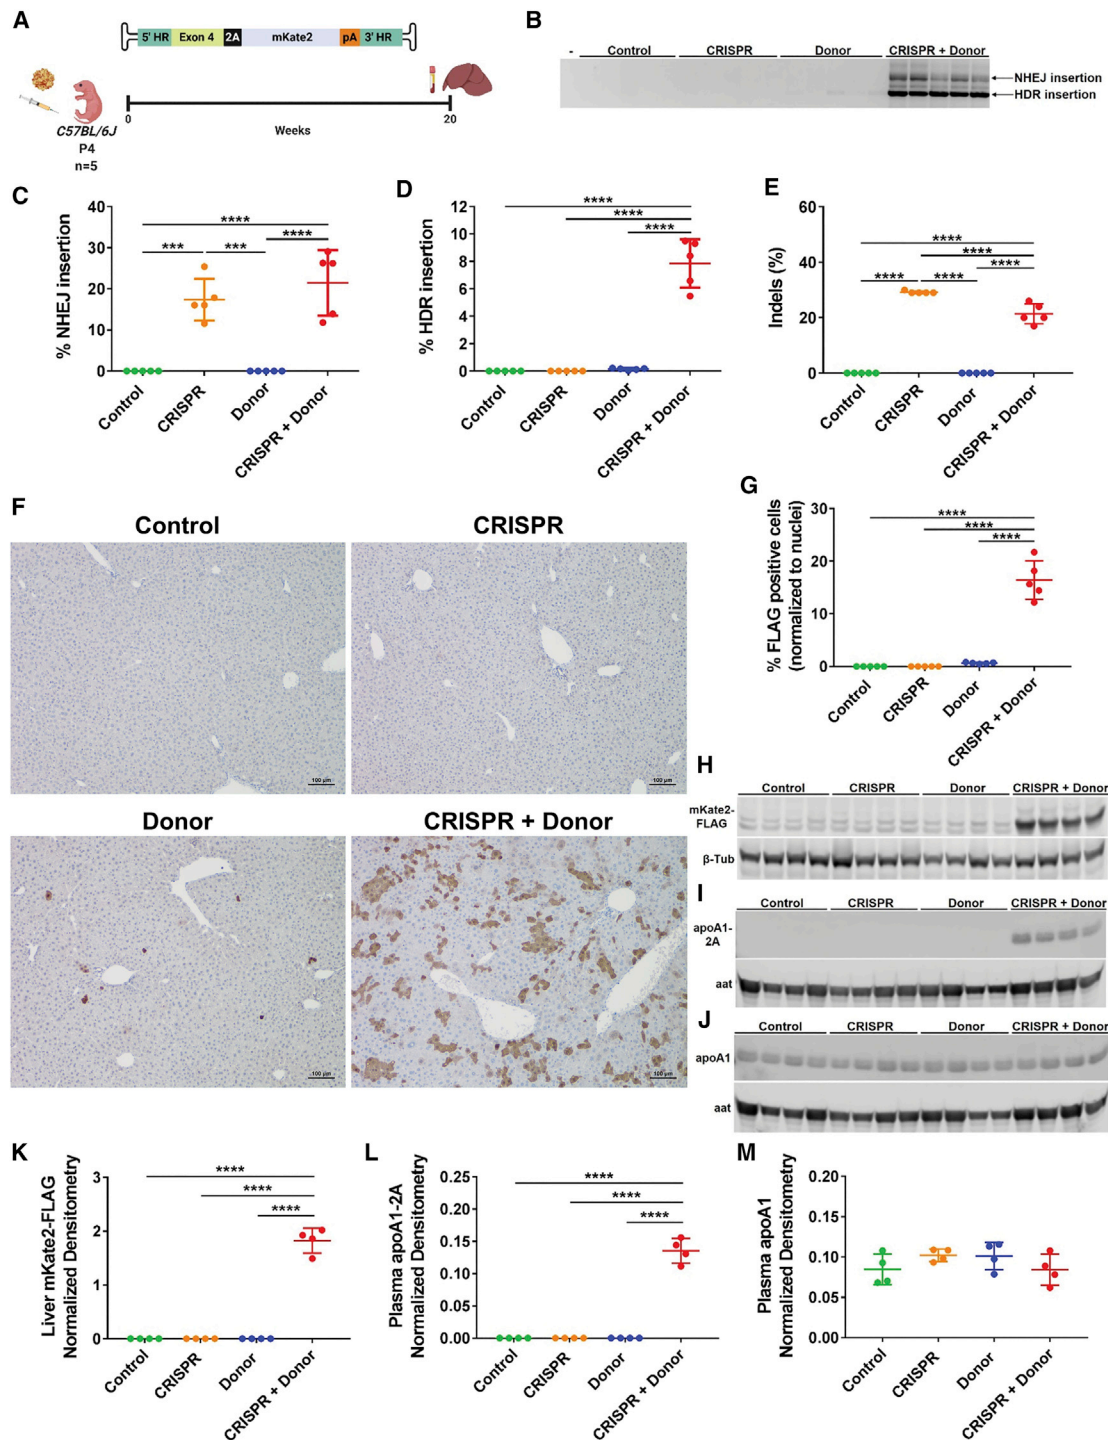

**Figure 3. Improved targeting of the *Apoa1* locus in neonatal mice injected at P4**

(A) Experimental design and AAV-Donor scheme. *C57BL/6J* mice were subcutaneously injected with AAV-CRISPR ( $5 \times 10^{11}$  GC) and/or an AAV-Donor template ( $5 \times 10^{11}$  GC) encoding a far-red fluorescent protein (mKate2) at P4 and liver and plasma were evaluated for the expression of the mKate2 protein at 20 weeks post-injection. Control mice were injected with AAV-GFP ( $5 \times 10^{11}$  GC). (B) Integration PCR on liver showed two main products corresponding to correct HDR (1,139 bp) and NHEJ insertion (2,031 bp) of AAV-Donor at the *Apoa1* locus. Minus (-) indicates water-only control. (C) Frequency of *Apoa1* alleles with NHEJ insertions of AAV genomes by ddPCR. (D) Frequency of correct HDR targeting of AAV-Donor by ddPCR. (E) Indel formation in the 3' UTR of *Apoa1* by ICE analysis. (F) Representative immunohistochemistry for

(legend continued on next page)

there was no evidence of the following adverse outcomes: (1) *Apoa1* 3' UTR targeting did not disrupt the gene or alter its expression level (Figures 2, 3, 4, 5, and S5), even when a high rate of targeting was observed (Figure S17); (2) expression of neighboring genes was not affected (Figure S5); (3) plasma cholesterol levels were unchanged suggesting preservation of the apoA1 function (Figure S6); and (4) we did not observe liver toxicity or tumors, at least within the time frame of these experiments (<6 months; Figures S6–S9 and S11). Finally, we recently demonstrated that our AAV-CRISPR system is liver restricted, resulting in no Cas9 activity in extra-hepatic tissues.<sup>32</sup>

Targeted integration in post-mitotic tissues, such as the adult liver, is limited by the very low rate of HDR-mediated repair. We determined the targeting frequency with three approaches: (1) ddPCR, (2) immunohistochemistry, and (3) co-expression of apoA1-2A and the transgenic proteins. In mice injected as adults with CRISPR + Donor, we observed the correct HDR integration in ~1% of *Apoa1* alleles, which resulted in ~6% of mKate2-expressing hepatocytes (Figures 2E–2G). In mice injected at P4 with the same AAVs, we observed ~8% of HDR-modified *Apoa1* alleles and ~16% positive hepatocytes (Figures 3D, 3F, and 3G). The greater relative ratio of HDR versus NHEJ editing events in the pups (Figures 3B versus 2B) could be partially due to a larger proportion of dividing cells at time of injection in the neonates. However, it should be noted that the dose used in pups was significantly higher than that used in adults relative to body weight. In a dose-ranging experiment in pups, we found that total editing events and positive hepatocytes were both reduced in a dose-dependent manner, but similar to adults when comparing equivalent doses (Figure S12). Therefore, the greater percentage of positive hepatocytes we observed in pups is mostly attributable to a higher AAV dose, rather than an increased propensity for HDR in neonatal liver. This rate is higher than what has been described previously, although a direct comparison is complicated by different viral dosages, routes of injection, transgenes, and time points.<sup>21</sup> Importantly, all the transgenic proteins achieved their expected localization (cytoplasmic for mKate2 and FAH and secreted for APOE and FIX).

To test the potential of the *Apoa1* locus for protein replacement therapy, we designed AAV-Donors encoding different therapeutic transgenes. We showed that the *Apoa1* locus enables sustained expression of FIX (Figure 4G), the clotting factor deficient in patients with hemophilia B. In mice treated with AAV-CRISPR + AAV-Donor, FIX levels increased up to ~230 ng/mL, which fall within the 2%–5% range required for therapeutic benefit.<sup>19</sup> Barzel et al.<sup>19</sup> previously reported much higher values of FIX produced from the *Alb* locus in adult injected-mice. However, a 2-fold higher dose of AAV-Donor was used as compared to our studies along with a different ELISA kit (home-

made versus commercial in this study). We also showed that the *Apoa1* locus drove the expression of comparable levels of another secreted therapeutic protein, APOE (Figure S14), whose deficiency results in familial hyperlipoproteinemia type III. As a result, the *Apoa1*-targeted expression of APOE dramatically reduced plasma lipids in a mouse model of hypercholesterolemia (Figure 5). Finally, we showed that the *Apoa1*-targeting could correct a severe metabolic liver disorder- HT-I (Figure 6). The targeted expression of FAH rescued lethality and restored liver function. These two disease models require different levels of gene correction for reaching therapeutic effects. While the *Fah*<sup>-/-</sup> model requires minimal gene correction for rescuing the hepatic toxicity,<sup>33</sup> a frequency of at least ~7% of HDR editing of *Ldlr* and ~20% of edited hepatocytes was required for ameliorating plasma cholesterol in a mouse model of familial hypercholesterolemia.<sup>34</sup> In agreement with these findings, we observed ~8% of HDR-modified *Apoa1* alleles and ~16% positive hepatocytes when mice are injected with a high dose as neonates (Figure 3) along with the amelioration of hypercholesterolemia in the *ApoE*<sup>-/-</sup> mouse model (Figure 5).

When we compared the *Apoa1*-targeted expression of secreted therapeutic proteins in CRISPR + Donor versus Donor mice, we surprisingly observed only a modest increase in FIX plasma levels between the two groups (Figure 4G). These mice showed rates of HDR and NHEJ insertion events at the *Apoa1* locus comparable with what was seen in the mKate2-targeted mice (Figures S13A–S13D and 2), suggesting that different AAV-Donors show similar targeted integration frequencies. We observed a ~3-fold increase of total *FIX* transgene mRNA in CRISPR + Donor mice as compared to Donor mice (Figure S13F). This result is comparable to the relative difference in FIX levels detected by ELISA (Figure 4G). Despite this, we were not able to detect either the bicistronic mRNA by endpoint PCR or the 2A-tagged apoA1 in plasma from Donor mice. These data suggest that a significant amount of FIX in Donor-only mice may arise from either leaky expression or off-target integration events. In contrast to mKate2, both the *FIX* and *APOE* coding sequences retain the start codon in their respective Donor cassettes, potentially making them more amenable to translation. It is possible that expression of these secreted proteins could originate from either (1) cryptic promoter activity in the Donor cassette (i.e., ITR-driven expression), (2) from off-target integration events, or (3) secretion from non-hepatic tissues. The relative contributions of HDR targeting versus off-target integration with and without nucleases is a worthwhile area for future investigation.

Two major concerns with genome editing are the risk of off-target cutting, as well as unwanted editing events at the target locus. We observed very efficient on-target editing of ~51%–54% (Figure 2C) in alleles that were not subject to HDR or NHEJ insertion. The

---

mKate2-FLAG (brown cells) in *Apoa1*-targeted mice. Scale bar is 100  $\mu$ m. (G) Quantification of FLAG-positive hepatocytes relative to total nuclei per field. (H) Western blot of mKate2-FLAG in liver lysates with  $\beta$ -tub as a loading control. (I and J) Western blot analysis of 2A-tagged (I) and total apoA1 (J) in plasma with aat as loading control. Aat shows a slight difference in protein expression based on sex: lanes 1, 4, 7, 8, 9, 10, 13, 14, and 15 are male mice; lanes 2, 3, 5, 6, 11, 12, and 16 are female mice. Four representative mice per group are shown in western blots. (K) Densitometry analysis of mKate2-FLAG in liver lysates relative to  $\beta$ -tub loading control. Densitometry analysis of apoA1-2A (L) and apoA1 (M) in plasma relative to aat loading control. Data are shown as mean  $\pm$  standard deviation (n = 5; n = 4 in densitometry analyses), with significance determined by one-way ANOVA followed by Tukey test. \*\*\*p < 0.001, \*\*\*\*p < 0.0001. (A) Created with BioRender.

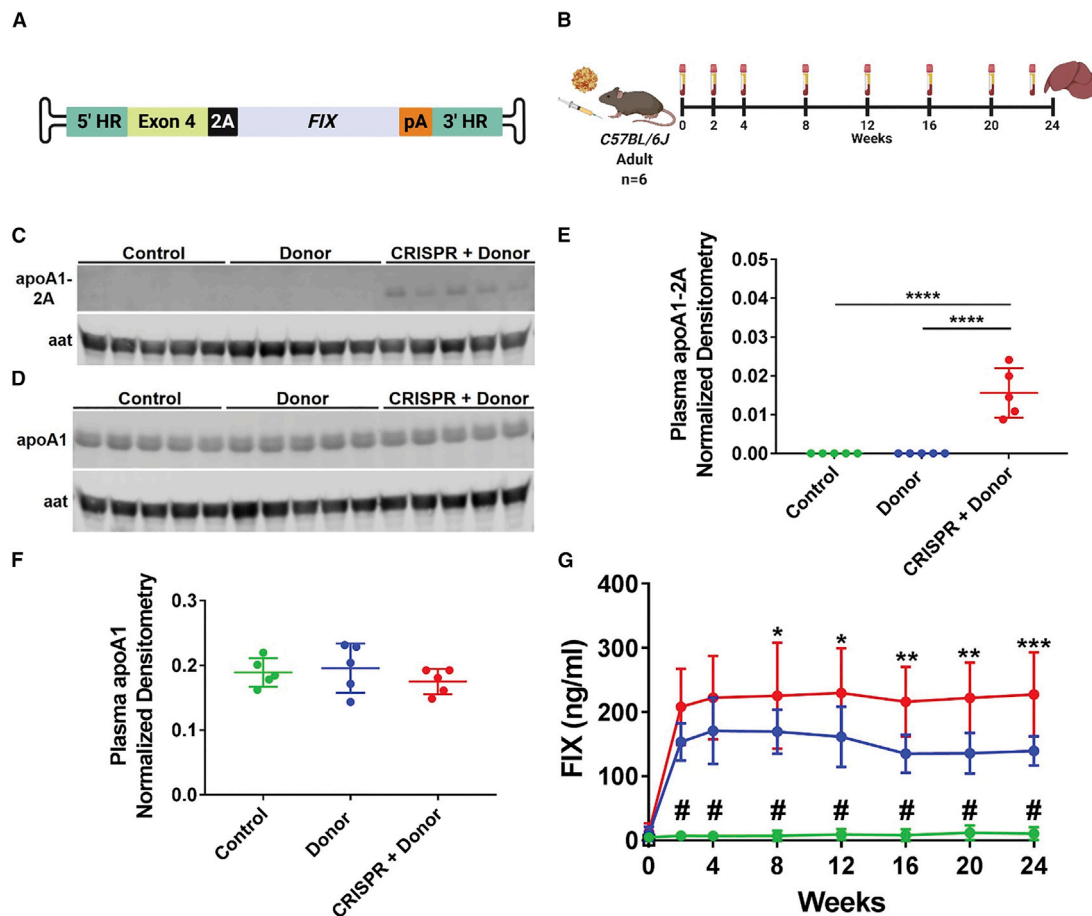

*ApoA1*-targeting gRNA appears to be very specific, since no off-target activity was detected above background at the top 13 predicted sites (Figure S3). However, when we analyzed the integration events at the *ApoA1* locus, we observed on-target NHEJ insertion of the AAV genome (Figures 2B, 3B, 5C, S13, and S14). By using a primer specific to the ITR sequence, we were able to quantify rates of  $\sim 12\%$  and  $21\%$  of *ApoA1* alleles with NHEJ insertion in adult- and neonatal-injected mice, respectively (Figures 2D and 3C). It is possible that our analysis underestimates the total NHEJ insertion rate by not detecting the integration events that do not contain intact ITRs. Recently it has been reported that the majority of NHEJ-integrated AAV genomes contain ITR elements (up to 83.5%) and that all the ITR regions are detectable at relatively similar read counts.<sup>35</sup> Despite the fact that most of the NHEJ insertion events were shown to not contain the

full-length AAV genome,<sup>35</sup> it is still possible that the integration of AAV-CRISPR at the *ApoA1* locus could lead to an unwanted permanent expression of the Cas9. Overall, our data confirm previous reports on partial or full-length integration of AAV vectors at nuclease-induced double-strand breaks, observed not only in the liver but also in muscle, brain, heart, and cochlea.<sup>8,35-39</sup> Therefore, NHEJ insertion of AAV genomes at the on-target site is a recurrent event and needs to be carefully evaluated in each context. This could be minimized by controlling the expression of Cas9 with inducible or self-deleting systems,<sup>36,40</sup> or with alternative Cas9 delivery methods (i.e., nanoparticles, mRNA, or protein). Interestingly, in the experiments to correct HT-I, we found evidence of robust positive selection of correctly HDR-mediated edited cells over cells with NHEJ insertion. Combining *ApoA1*-targeting with synthetic selection strategies



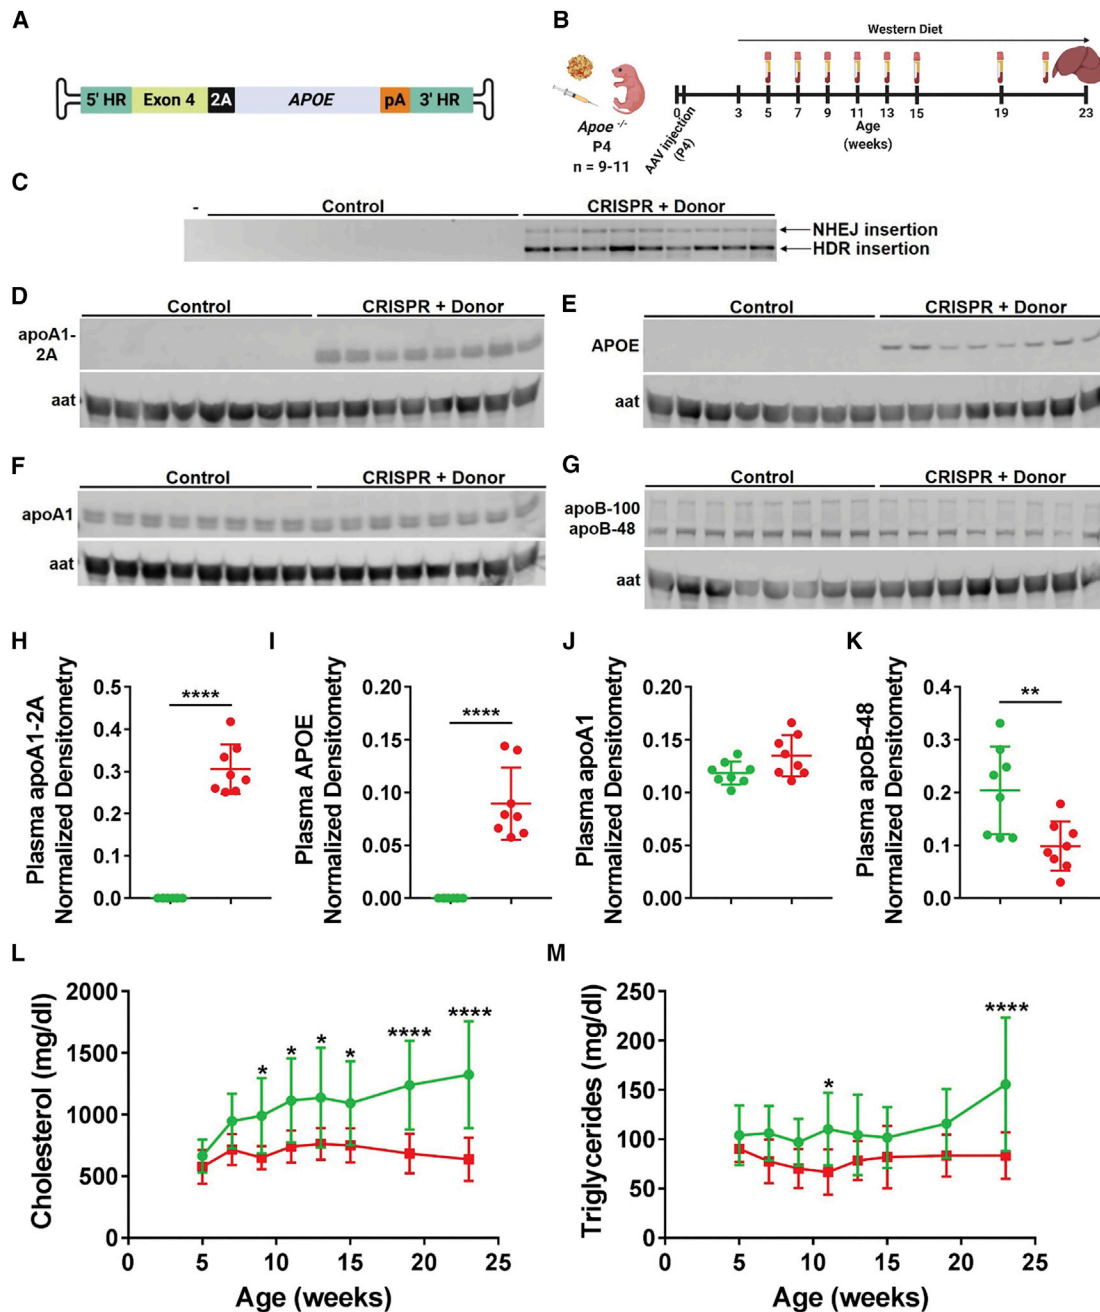

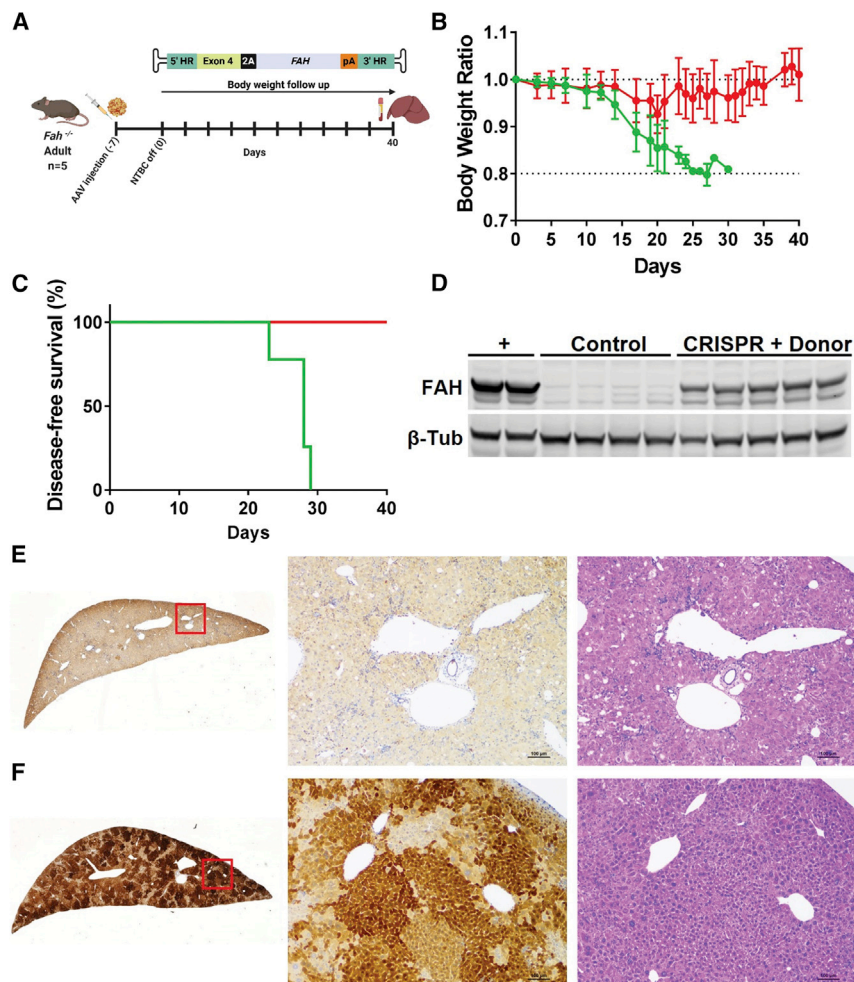

**Figure 6. Correction of HT-I through targeted integration at the *ApoA1* locus**

(A) Adult *Fah*<sup>-/-</sup> mice were intraperitoneally injected with either saline (control) or AAV-CRISPR plus an AAV-Donor encoding a human *FAH* transgene ( $5 \times 10^{11}$  GC each; CRISPR + Donor). NTBC was withdrawn at 7 days post-injection (time 0). Body weight was monitored over time up to 40 days and liver and plasma samples were collected for analyses. (B) Body weight ratios normalized to time zero (red line, CRISPR + Donor; green line, control mice). (C) Kaplan-Meier curve showing disease-free survival. Mice were euthanized upon loss of >20% body weight (red line, CRISPR + Donor; green line, control mice). One control mouse was found dead at day 30. (D) Western blot analysis of FAH in liver lysates with  $\beta$ -tub as a loading control. Plus (+) indicates a wild-type mouse liver as a positive control for endogenous *Fah* levels. (E) Representative FAH and hematoxylin and eosin staining in liver from control mice. (F) Representative FAH and hematoxylin and eosin staining in liver from CRISPR + Donor mice. Red squares are amplified in the images on the right. Scale bar is 100  $\mu$ m. (A) Created with BioRender.

ports for all ENCODE datasets can be found at <https://www.encodeproject.org/> associated with the experiment summary accession numbers.

Mouse liver H3K27 acetylation ChIP-seq was performed for this study using the ChIPmentation protocol described at <https://www.medical-epigenomics.org/papers/schmidl2015/>.<sup>41</sup> Briefly, hepatocytes were extracted from the livers of 8-week-old *C57BL/6* mice using the protocol described in Foretz et al.<sup>42</sup> 1 million hepatocytes were cross-linked and sonicated for 6 cycles in

could be an effective way to selectively expand hepatocytes with HDR integration and merits further exploration.

In conclusion, we demonstrate that *ApoA1* is a viable and useful integration site for liver-directed genome editing. Theoretically, any therapeutic transgene that does not exceed the cargo capacity of AAV could be targeted to the *ApoA1* locus, making our method applicable to numerous genetic disorders. This platform is particularly valuable because it allows for permanent integration of entire transgenes, making therapies generalizable to larger patient populations and not mutation specific.

## MATERIALS AND METHODS

### ChIP-seq and ATAC-seq

Human and mouse liver ChIP-seq (H3K27 acetylation and RNA Pol II) and ATAC-seq datasets used in this study are listed in Table S2. With the exception of the mouse liver H3K27 acetylation ChIP-seq dataset, all other datasets were obtained from ENCODE project database (<https://www.encodeproject.org/>) as these datasets are highly validated. Relevant experiment, biosample and dataset descriptions, and accession numbers are provided in Table S2. Quality control re-

order to shear chromatin in ~200–400 bp length fragments. ChIPmentation was performed according to protocol and post amplification libraries were cleaned using AMPure bead size selection yielding a library of DNA fragments between 200–500 bp. Library was sequenced on an Illumina Next-Seq 500 to generate raw reads.

Both in-house and ENCODE ChIP-seq datasets were processed from raw read FASTQ files using the ENCODE (phase-3) transcription factor and histone ChIP-seq pipeline specification created by the Kundaje lab ([https://github.com/NHLBI-BCB/TF\\_chipseq\\_pipeline](https://github.com/NHLBI-BCB/TF_chipseq_pipeline)). Alignments were performed on the NCBI GRCh38 (hg38) and GRCm38 (mm10) reference genomes.

ATAC-seq datasets were processed from raw read FASTQ files using the RIESLING pipeline<sup>43</sup> developed by the Lin and Gordon laboratories (v2.8.1; <https://github.com/GordonLab/riesling-pipeline>).

ChIP-seq and ATAC-seq signal was plotted for specified loci from aligned read files (BAMs) that were filtered for duplicate reads using the Bamplot tool created from the Lin lab (<https://github.com/>

[linlabbcm/bamplot](https://linlabbcm/bamplot)). This representation plots binned aligned read density in units of reads per million mapped reads per base pair (rpm/bp).

### Plasmid design and cloning

gRNAs targeting the *Apoa1* 3' UTR (exon 4) were designed by manual inspection based on the presence of a canonical NNGRRT PAM for SaCas9. Cloning of gRNAs was accomplished by annealing oligonucleotides (Sigma-Aldrich) and ligating into the BbsI sites of 1313-pAAV-U6-SA-BbsI-MluI-gRNA-HLP-SaCas9-HA-OLLAS-spA (Addgene 109314)<sup>36</sup> to obtain 1507-pAAV-U6-*Apoa1*-gRNA2-SA-HLP-SaCas9-HA-OLLAS-spA. This plasmid encodes both the gRNA under the control of a U6 promoter and SaCas9 under the control of the hybrid liver-specific promoter (HLP).<sup>44</sup> The AAV donor plasmids were generated by gene synthesis (Integrated DNA Technologies) and standard molecular biology approaches. The donor plasmids include exon 4 of the murine *Apoa1* gene (NCBI: NC\_000075.7) but introduce the transgene coding sequences in place of the endogenous stop codon, flanked by homology arms to the *Apoa1* locus on each side (5' homology region, 700 bp; 3' homology region, 480 bp). In place of the stop codon, each donor plasmid includes an XbaI cloning site (encoding serine, arginine), followed by a glycine-proline-glycine-P2A sequence (referred as 2A) in frame with the transgene coding sequence, followed by a small synthetic poly(A) signal. Plasmids 1729-pAAV-*Apoa1*-Target-2A-mKate-pA, 1730-pAAV-*Apoa1*-Target-2A-APOE-pA, 1731-pAAV-*Apoa1*-Target-2A-FIX-pA and 1771-pAAV-*Apoa1*-Target-2A-FAH-pA encode the mKate2-FLAG (gift of Dr. Joshua Wythe, Baylor College of Medicine), APOE, FIX, and FAH transgenes, respectively. Complete vector sequences are included in the [Supplemental information](#), and plasmids will be made available through Addgene upon publication.

### AAV production

Recombinant AAV8 vectors were generated as previously described<sup>45</sup> with several modifications.<sup>46</sup> Plasmids required for AAV packaging, adenoviral helper plasmid pAdDeltaF6 (PL-F-PVADF6), and AAV8 packaging plasmid pAAV2/8 (PL-T-PV0007) were obtained from the University of Pennsylvania Vector Core. Each AAV transgene construct was co-transfected with the packaging constructs into 293T cells (ATCC, CRL-3216) using polyethylenimine (PEI). Cell pellets were harvested and purified using a single cesium chloride density gradient centrifugation. Fractions containing AAV vector genomes were pooled and then dialyzed against PBS using a 100 kD Spectra-Por Float-A-Lyzer G2 dialysis device (Spectrum Labs, G235059) to remove the cesium chloride. Purified AAV were concentrated using a Sartorius Vivaspin Turbo 4 Ultrafiltration Unit (VS04T42) and stored at  $-80^{\circ}\text{C}$  until use. AAV titers were calculated after DNase digestion using qPCR relative to a standard curve of the transgene plasmid. Primers used for titer are included in [Table S3](#).

### Animals

*C57BL/6J* (stock number: 000664) and *ApoE*<sup>-/-</sup> (B6.129P2-Apoetm1Unc/J; stock number: 002052) mice were obtained from The Jackson Laboratories. *Fah*<sup>-/-</sup> mice were generated by Dr. Karl-Dimiter Bissig and maintained as an in-house breeding colony at Baylor College of Medicine. Animals were allowed free access to food and water and main-

tained on a standard chow diet. All mice used were male, except for mixed sex mice used in experiment described in [Figures 3](#) and [S10–S12](#). Where indicated, *ApoE*<sup>-/-</sup> mice were fed a western diet (0.21% cholesterol and 21% fat, D12079B, Research Diets). Male *Fah*<sup>-/-</sup> mice were kept on 16 mg/L NTBC (Lab Network) in the drinking water before experiments. When NTBC was withdrawn, mice were monitored daily and euthanized upon loss of >20% body weight. AAV8 vectors ( $5 \times 10^{11}$  genome copies [GC] each) were diluted in 300  $\mu\text{L}$  of sterile saline and intraperitoneally injected to 8-week-old mice. For delivery at P4, AAV ( $5 \times 10^{11}$ ,  $5 \times 10^{10}$ , or  $2.5 \times 10^{10}$  GC each) were diluted in 50  $\mu\text{L}$  sterile saline and delivered subcutaneously. Control mice were injected with AAV8-CB-EGFP (AAV-GFP), or just saline where indicated. All treatment conditions were randomly allocated within each cage of mice at the time of injection. Mice were fasted 5 h prior to injection and again before subsequent blood collection. Blood was collected via retro-orbital bleeding using heparinized Natelson collection tubes, and plasma was isolated by centrifugation at  $10,000 \times g$  for 20 min at  $4^{\circ}\text{C}$ . All experiments were approved by the Baylor College of Medicine Institutional Animal Care and Use Committee (IACUC) and performed in accordance with institutional guidelines under protocol number AN-6243.

### Integration PCR

Genomic DNA was extracted from livers using the DNeasy Blood and Tissue kit (QIAGEN) following the manufacturer's protocol. The *Apoa1* locus was PCR-amplified to detect integration of the AAV-Donor by using a forward primer within an endogenous genomic region upstream of the 5' homology region and the reverse primer within the transgene cassette. APEX TaqRed Master Mix (Apex Bio-research Products) was used following the manufacturer's protocol and the PCR products were separated by agarose gel electrophoresis. Primers sequences are available in [Table S3](#).

### Targeted deep sequencing

Off-target sites for the *Apoa1* gRNA were determined using the online bioinformatics tool COSMID at <https://crispr.bme.gatech.edu/>.<sup>47</sup> Searches were completed on the least stringent settings (up to three indels, two one-base deletions, two one-base insertions). In addition, we allowed for some leniency in the PAM motif by searching both NNGRRT and NNGRR PAM sequences. Primers specific to the *Apoa1* and to the 15 top-scored off-target loci were used to amplify these genomic sites with Hercules II Fusion DNA Polymerase (Agilent Technologies). PCR amplification failed for two off-target loci (OT9 and OT13). Secondary PCR was performed using 2  $\mu\text{L}$  of the primary PCR product to add barcode sequences and the Illumina P5 and P7 adaptor sequences to each amplicon. The final barcoded amplicons were purified using magnetic beads, pooled in equimolar amounts, and sequenced using an Illumina MiSeq. Alignment of sequence reads to reference sequences and indel quantification was carried out as previously described.<sup>36</sup> Indel data and deep sequencing primers are provided in [Tables S1](#) and [S3](#).

### ICE analysis

Primers were designed to amplify the *Apoa1* locus binding at least 350 bp away from the cut site at each side ([Table S3](#)). PCR was

performed using Phusion DNA polymerase (Roche) and the 830 bp product was separated by agarose gel electrophoresis and gel extracted using the QIAquick gel extraction kit (QIAGEN). The PCR product was Sanger sequenced and the indel percentage was determined by Inference of CRISPR Edits (ICE) analysis (<https://ice.synthego.com/#/>) using a control chromatogram for comparison.

#### ddPCR

10 units of BamHI or MscI restriction enzymes (New England Biolabs) were used for fragmentation of 1 µg of genomic DNA, based on insensitivity to methylation, absence of restriction site in the targeted amplicon, and specific amplification of either the NHEJ- or HDR-integrated *Apoa1* alleles. MscI cuts within the ITR regions enabling the specific amplification of the HDR-integrated alleles by using a forward primer binding the *Apoa1* locus upstream of the 5' homology region and a reverse primer in the 2A sequence of AAV-Donor. For the NHEJ-insertion amplification, genomic DNA was digested with BamHI and a reverse primer was designed to anneal within the ITR regions enabling the detection of NHEJ-insertion of either AAV-CRISPR or AAV-Donor, at either orientation. A genomic region spanning exon 1 and intron 3 of *Apoa1* was PCR-amplified as reference for the total number of genome copies. Probes were designed to anneal within each specific amplicon by using Primer 3 plus (<https://www.bioinformatics.nl/cgi-bin/primer3plus/primer3plus.cgi>) and synthesized by Integrated DNA Technologies with FAM/Black Hole modifications. Each 20 µL PCR reaction contained 50 ng of appropriate digested DNA, 0.9 µM of each primer, 0.25 µM of FAM-probe, and 1× ddPCR Supermix for Probes (Bio-Rad Laboratories), which was combined with 70 µL of Droplet Generation Oil for Probes in a QX100 Droplet Generator (Bio-Rad Laboratories). Droplets were transferred into a 96-well plate and PCR-amplified using a three-step thermal cycling protocol with 2 min of extension time for 40 cycles. Droplet fluorescence was read using a QX100 Droplet Reader and analyzed with QuantaSoft Software (Bio-Rad Laboratories). ddPCR data are expressed as percentage of specific integration events relative to total genome copies. Primer and probe sequences used for ddPCR are listed in Table S3.

#### Immunohistochemistry

Livers were formalin-fixed for 24 h and then gradually dehydrated with ethanol and paraffin-embedded. Immunohistochemistry and hematoxylin and eosin staining were performed by the Texas Digestive Diseases Morphology Core at Baylor College of Medicine. Briefly, liver sections were deparaffinized and subjected to antigen retrieval with Target Retrieval Solution (S1699, DAKO). The sections were then incubated with 3% hydrogen peroxide, followed by incubation in normal serum to block nonspecific protein binding. Sections were incubated 1 h at room temperature with the following primary antibodies: anti-Ki67 (1:60, CRM325, Biocare), anti-FLAG (1:5000, 600-401-383, Rockland Antibodies), and anti-FAH (1:200, SAB2108553, Sigma-Aldrich). The Ki67 and FLAG antibodies were then detected respectively with a Rabbit-on-Rodent HRP-Polymer (RMR622H, Biocare) and ImmPRESS Horse Anti-Rabbit IgG Polymer Kit (MP-7401, Vector Laboratories) and visualized with DAB

chromogen (DB801, Biocare). The FAH antibody was detected with a polymer and visualized with DAB chromogen (Leica Bond Polymer Detection kit, DS9800). TUNEL stainings were performed and detected using ApopTag Peroxidase *In Situ* Apoptosis Detection Kit (Millipore, S7100). All slides were counterstained with hematoxylin, dehydrated, and mounted with a permanent mounting medium. A Nikon Ci-L bright field microscope was used for imaging at the Integrated Microscopy core (Baylor College of Medicine). Direct mKate2 fluorescence on liver slices was imaged by Leica DMIL LED Inverted Fluorescence Microscope. FLAG-positive cells quantification was performed by manual count of positive hepatocytes in ten 200× magnification images per liver taken across the whole section. Nuclei were quantified using ImageJ.<sup>48</sup>

#### Western blot

Liver tissue was homogenized in ~10 volumes of radioimmunoprecipitation assay (RIPA) buffer (50 mM Tris pH 8.0, 1 mM EDTA, 1% Triton X-100, 0.1% sodium dodecyl sulfate, 0.5% sodium deoxycholate, 150 mM sodium chloride, and protease inhibitors [Roche 11836153001]) using a Bead Blaster 24 (Benchmark D2400). Protein concentrations were determined using BCA assay (Thermo-Pierce #23227). Liver lysates (50 µg) or plasma (1 µL of 1:2 dilution) were diluted in 4× LDS buffer (Life Technologies, Ref. NP0007) supplemented with 5% beta-mercaptoethanol and separated by SDS-PAGE using 4%–12% gradient gels (Life Technologies NP0322BOX). Proteins were transferred to polyvinylidene fluoride (PVDF) membranes (Millipore IPFL00010) followed by blocking for 2 h at room temperature in a 2:1 solution of Odyssey Blocking Buffer (Li-Cor 927-40000) and PBS with 0.05% Tween-20 (PBS-T). Primary antibodies to the FLAG tag (1:5,000, rabbit, 600-401-383, Rockland), 2A peptide (1:5,000, rabbit, ABS31, Sigma-Aldrich), APOE (1:1,000, rabbit, ab52607, Abcam), FAH (1:1,000, rabbit, SAB2100745, Sigma-Aldrich), apoB (1:5,000, rabbit, K23300R, Meridian), apoA1 (1:5,000, rabbit, K23500R, Meridian), alpha-1 antitrypsin (Aat; 1:1,000, rabbit, 16382-1-AP, Proteintech), and beta tubulin (1:500, mouse, University of Iowa Developmental Studies Hybridoma Bank E7) were diluted in 1% BSA in PBS-T and membranes were incubated overnight at 4 degrees. Goat anti-rabbit 680 nm and anti-mouse 800 nm antibodies (1:15,000, 611-144-002-0.5, and 610-145-002-0.5, Rockland) were incubated at room temperature for 1 h and imaged using an Odyssey Classic (Li-Cor). Densitometry analyses were performed using Image Studio Lite Version 5.2.5 and data are presented as normalized to loading control.

#### Plasma analysis

Alanine aminotransferase (ALT) was measured using the Teco ALT (SGPT) Kinetic Liquid Kit (A524-150). Total cholesterol was measured using the Wako Cholesterol E kit (999-02 601). Total triglycerides were measured using Infinity Triglycerides Reagent (TR22421 Thermo Fisher). Human APOE was measured in 1:12.5 diluted plasma by Human APOE ELISA Kit (ab108813, Abcam), following the manufacturer's protocol. Human FIX measurement was measured in 1:50 diluted plasma by Factor IX Human SimpleStep ELISA Kit (ab188393, Abcam), following the manufacturer's

protocol. Plasma from *Fah*<sup>-/-</sup> mice was analyzed for ALT, aspartate aminotransferase (AST), gamma-glutamyl transferase (GGT), and total bilirubin by the pathology core (Center for Comparative Medicine at Baylor College of Medicine).

#### RNA isolation and analysis

RNA was isolated from liver using RNeasy Mini Kit (74106, QIAGEN), following the manufacturer's protocol. 1 µg of RNA was used for generating cDNA by the iScript cDNA synthesis kit (170-8891, Bio-Rad). cDNA was diluted 1:25 and used as template for qPCR analysis using iTaq Universal SYBR Green Supermix (1725124, Bio-Rad) and ViiA 7 Real-Time PCR System (Thermo Fisher Scientific). In *FIX* qPCR, RNA was treated with DNase I and qPCR was performed also on RT (-) reactions as control for any potential contamination with AAV genome DNA. A dissociation curve was carried out at the end of qPCR for assessing the homogeneity of the PCR products. Relative gene expression was calculated using the  $\Delta\Delta C_t$  method and graphed as fold change relative to  $\beta$ -Actin. For detecting the bicistronic *Apoa1*-2A-*FIX* mRNA, 50 ng of cDNA were amplified using a forward primer binding the exon 3 of *Apoa1* and the reverse primer binding the 2A sequence. APEX TaqRed Master Mix (Apex Bio Research Products) was used following the manufacturer's protocol and the PCR products were separated by agarose gel electrophoresis. All primers for qPCR and end point PCR are listed in Table S3.

#### Statistics

Graphpad Prism 7 was used for statistical analyses. All data are shown as the mean  $\pm$  standard deviation. Comparisons involving two groups were evaluated by a two-tailed Student's t test. For comparisons involving three or more groups, a one-way or two-way ANOVA was applied, with Tukey's or Bonferroni's post-test used to test for significant differences among groups. In all cases, significance was assigned at  $p < 0.05$ .

#### SUPPLEMENTAL INFORMATION

Supplemental information can be found online at <https://doi.org/10.1016/j.omtm.2021.04.011>.

#### ACKNOWLEDGMENTS

This work was supported by The National Institutes of Health (HL132840 and U42OD026645 to W.R.L., DK115461 and HL134510 to K.-D.B., and UG3HL151545 to G.B. and W.R.L.); The Cancer Prevention and Research Institute of Texas (RR140081 to G.B.); and The American Heart Association (19PRE34380467 to A.M.D. and 19POST34430092 to M.D.G.); This work was also supported by the Texas Digestive Diseases Morphology Core (P30DK56338) and the Integrated Microscopy Core (DK56338 and CA125123).

#### AUTHOR CONTRIBUTIONS

M.D.G., K.-D.B., G.B., and W.R.L. conceived the project and designed the studies; M.D.G. performed and analyzed most of the experiments; A.H. produced the viral vectors; M.D.G., A.L., A.H., M.B., and A.M.D. performed the *in vivo* experiments; N.A.C., H.E.S., C.Y.L., and J.D.B.

performed ChIP-seq and ATAC-seq analysis; A.L. and M.D.G. performed analysis of genome editing; M.D.G. and W.R.L. wrote the manuscript, which was revised and approved by all authors.

#### DECLARATION OF INTERESTS

C.Y.L. is an executive and shareholder of Kronos Bio. A provisional patent application has been filed by Baylor College of Medicine entitled "Selective expansion of gene targeted cells" on November 25, 2019. The inventors on this patent are W.R.L., A.H., Kelsey Jarrett, K.-D.B., M.D.G., and Mia Furgurson. The strategy of targeting the *Apoa1* locus for docking therapeutic transgenes described in this manuscript is a component of the patent application.

#### REFERENCES

- Pampols, T. (2010). Inherited metabolic rare disease. *Adv. Exp. Med. Biol.* 686, 397–431.
- De Giorgi, M., and Lagor, W.R. (2019). Gene Delivery in Lipid Research and Therapies. *Methodist DeBakey Cardiovasc. J.* 15, 62–69.
- Wang, D., Tai, P.W.L., and Gao, G. (2019). Adeno-associated virus vector as a platform for gene therapy delivery. *Nat. Rev. Drug Discov.* 18, 358–378.
- Rogers, A.E., Shaka, J.A., Pechet, G., and MacDonald, R.A. (1961). Regeneration of the liver. Absence of a "humoral factor" affecting hepatic regeneration in parabiotic rats. *Am. J. Pathol.* 39, 561–578.
- Magami, Y., Azuma, T., Inokuchi, H., Kokuno, S., Moriyasu, F., Kawai, K., and Hattori, T. (2002). Cell proliferation and renewal of normal hepatocytes and bile duct cells in adult mouse liver. *Liver* 22, 419–425.
- Cunningham, S.C., Spinoulas, A., Carpenter, K.H., Wilcken, B., Kuchel, P.W., and Alexander, I.E. (2009). AAV2/8-mediated correction of OTC deficiency is robust in adult but not neonatal Spf(ash) mice. *Mol. Ther.* 17, 1340–1346.
- Wang, L., Bell, P., Lin, J., Calcedo, R., Tarantal, A.F., and Wilson, J.M. (2011). AAV8-mediated hepatic gene transfer in infant rhesus monkeys (*Macaca mulatta*). *Mol. Ther.* 19, 2012–2020.
- Wang, L., Yang, Y., Breton, C., Bell, P., Li, M., Zhang, J., Che, Y., Saveliev, A., He, Z., White, J., et al. (2020). A mutation-independent CRISPR-Cas9-mediated gene targeting approach to treat a murine model of ornithine transcarbamylase deficiency. *Sci. Adv.* 6, eaax5701.
- Jensen, K.T., Fløe, L., Petersen, T.S., Huang, J., Xu, F., Bolund, L., Luo, Y., and Lin, L. (2017). Chromatin accessibility and guide sequence secondary structure affect CRISPR-Cas9 gene editing efficiency. *FEBS Lett.* 591, 1892–1901.
- Lombardo, A., Cesana, D., Genovese, P., Di Stefano, B., Provasi, E., Colombo, D.F., Neri, M., Magnani, Z., Cantore, A., Lo Riso, P., et al. (2011). Site-specific integration and tailoring of cassette design for sustainable gene transfer. *Nat. Methods* 8, 861–869.
- Smith, J.R., Maguire, S., Davis, L.A., Alexander, M., Yang, F., Chandran, S., ffrench-Constant, C., and Pedersen, R.A. (2008). Robust, persistent transgene expression in human embryonic stem cells is achieved with AAVS1-targeted integration. *Stem Cells* 26, 496–504.
- Gomez-Ospina, N., Scharenberg, S.G., Mostrel, N., Bak, R.O., Mantri, S., Quadros, R.M., Gurumurthy, C.B., Lee, C., Bao, G., Suarez, C.J., et al. (2019). Human genome-edited hematopoietic stem cells phenotypically correct Mucopolysaccharidosis type I. *Nat. Commun.* 10, 4045.
- Ordovás, L., Boon, R., Pistoni, M., Chen, Y., Wolfs, E., Guo, W., Sambathkumar, R., Bobis-Wozowicz, S., Helsen, N., Vanhove, J., et al. (2015). Efficient Recombinase-Mediated Cassette Exchange in hPSCs to Study the Hepatocyte Lineage Reveals AAVS1 Locus-Mediated Transgene Inhibition. *Stem Cell Reports* 5, 918–931.
- Klatt, D., Cheng, E., Hoffmann, D., Santilli, G., Thrasher, A.J., Brendel, C., and Schambach, A. (2020). Differential Transgene Silencing of Myeloid-Specific Promoters in the AAVS1 Safe Harbor Locus of Induced Pluripotent Stem Cell-Derived Myeloid Cells. *Hum. Gene Ther.* 31, 199–210.

15. Papapetrou, E.P., and Schambach, A. (2016). Gene Insertion Into Genomic Safe Harbors for Human Gene Therapy. *Mol. Ther.* *24*, 678–684.
16. Kimura, Y., Shofuda, T., Higuchi, Y., Nagamori, I., Oda, M., Nakamori, M., Onodera, M., Kanematsu, D., Yamamoto, A., Katsuma, A., et al. (2019). Human Genomic Safe Harbors and the Suicide Gene-Based Safeguard System for iPSC-Based Cell Therapy. *Stem Cells Transl. Med.* *8*, 627–638.
17. Sadelain, M., Papapetrou, E.P., and Bushman, F.D. (2011). Safe harbours for the integration of new DNA in the human genome. *Nat. Rev. Cancer* *12*, 51–58.
18. Sharma, R., Anguela, X.M., Doyon, Y., Wechsler, T., DeKelver, R.C., Sproul, S., Paschon, D.E., Miller, J.C., Davidson, R.J., Shivak, D., et al. (2015). In vivo genome editing of the albumin locus as a platform for protein replacement therapy. *Blood* *126*, 1777–1784.
19. Barzel, A., Paulk, N.K., Shi, Y., Huang, Y., Chu, K., Zhang, F., Valdmans, P.N., Spector, L.P., Porteus, M.H., Gaensler, K.M., and Kay, M.A. (2015). Promoterless gene targeting without nucleases ameliorates haemophilia B in mice. *Nature* *517*, 360–364.
20. Porro, F., Bortolussi, G., Barzel, A., De Caneva, A., Iaconcig, A., Vodret, S., Zentilin, L., Kay, M.A., and Muro, A.F. (2017). Promoterless gene targeting without nucleases rescues lethality of a Crigler-Najjar syndrome mouse model. *EMBO Mol. Med.* *9*, 1346–1355.
21. De Caneva, A., Porro, F., Bortolussi, G., Sola, R., Lisjak, M., Barzel, A., Giacca, M., Kay, M.A., Vlahoviček, K., Zentilin, L., and Muro, A.F. (2019). Coupling AAV-mediated promoterless gene targeting to SaCas9 nuclease to efficiently correct liver metabolic diseases. *JCI Insight* *5*, e128863.
22. Ou, L., Przybylla, M.J., Ahlat, O., Kim, S., Overn, P., Jarnes, J., O'Sullivan, M.G., and Whitley, C.B. (2020). A Highly Efficacious PS Gene Editing System Corrects Metabolic and Neurological Complications of Mucopolysaccharidosis Type I. *Mol Ther* *28*, 1442–1454.
23. Zhang, J.P., Cheng, X.X., Zhao, M., Li, G.H., Xu, J., Zhang, F., Yin, M.D., Meng, F.Y., Dai, X.Y., Fu, Y.W., et al. (2019). Curing hemophilia A by NHEJ-mediated ectopic F8 insertion in the mouse. *Genome Biol.* *20*, 276.
24. Cancer Genome Atlas Research Network. (2017). Comprehensive and Integrative Genomic Characterization of Hepatocellular Carcinoma. *Cell* *169*, 1327–1341.
25. Schulze, K., Imbeaud, S., Letouze, E., Alexandrov, L.B., Calderaro, J., Rebouissou, S., Couchy, G., Meiller, C., Shinde, J., Soysouvanh, F., et al. (2015). Exome sequencing of hepatocellular carcinomas identifies new mutational signatures and potential therapeutic targets. *Nat. Genet.* *47*, 505–511.
26. Chandler, R.J., Venturoni, L.E., Liao, J., Hubbard, B.T., Schneller, J.L., Hoffmann, V., Gordo, S., Zang, S., Ko, C.W., Chau, N., et al. (2020). Promoterless, nuclease-free genome editing confers a growth advantage for corrected hepatocytes in mice with methylmalonic acidemia. *Hepatology*. Published online September 25, 2020. <https://doi.org/10.1002/hep.31570>.
27. Anderson, N.L., and Anderson, N.G. (2002). The human plasma proteome: history, character, and diagnostic prospects. *Mol. Cell. Proteomics* *1*, 845–867.
28. Eggerman, T.L., Hoeg, J.M., Meng, M.S., Tombragel, A., Bojanovski, D., and Brewer, H.B., Jr. (1991). Differential tissue-specific expression of human apoA-I and apoA-II. *J. Lipid Res.* *32*, 821–828.
29. Pankowicz, F.P., Jarrett, K.E., Lagor, W.R., and Bissig, K.D. (2017). CRISPR/Cas9: at the cutting edge of hepatology. *Gut* *66*, 1329–1340.
30. Meir, K.S., and Leitersdorf, E. (2004). Atherosclerosis in the apolipoprotein-E-deficient mouse: a decade of progress. *Arterioscler. Thromb. Vasc. Biol.* *24*, 1006–1014.
31. Lindstedt, S., Holme, E., Lock, E.A., Hjalmarson, O., and Strandvik, B. (1992). Treatment of hereditary tyrosinaemia type I by inhibition of 4-hydroxyphenylpyruvate dioxygenase. *Lancet* *340*, 813–817.
32. De Giorgi, M., Jarrett, K.E., Burton, J.C., Doerfler, A.M., Hurley, A., Li, A., Hsu, R.H., Furgurson, M., Patel, K.R., Han, J., et al. (2020). Depletion of essential isoprenoids and ER stress induction following acute liver-specific deletion of HMG-CoA reductase. *J. Lipid Res.* *61*, 1675–1686.
33. Yin, H., Xue, W., Chen, S., Bogorad, R.L., Benedetti, E., Grompe, M., Kotliansky, V., Sharp, P.A., Jacks, T., and Anderson, D.G. (2014). Genome editing with Cas9 in adult mice corrects a disease mutation and phenotype. *Nat. Biotechnol.* *32*, 551–553.
34. Zhao, H., Li, Y., He, L., Pu, W., Yu, W., Li, Y., Wu, Y.T., Xu, C., Wei, Y., Ding, Q., et al. (2020). In Vivo AAV-CRISPR/Cas9-Mediated Gene Editing Ameliorates Atherosclerosis in Familial Hypercholesterolemia. *Circulation* *141*, 67–79.
35. Hanlon, K.S., Kleinstiver, B.P., Garcia, S.P., Zaborowski, M.P., Volker, A., Spirig, S.E., Muller, A., Sousa, A.A., Tsai, S.Q., Bengtsson, N.E., et al. (2019). High levels of AAV vector integration into CRISPR-induced DNA breaks. *Nat. Commun.* *10*, 4439.
36. Li, A., Lee, C.M., Hurley, A.E., Jarrett, K.E., De Giorgi, M., Lu, W., Balderrama, K.S., Doerfler, A.M., Deshmukh, H., Ray, A., et al. (2018). A Self-Deleting AAV-CRISPR System for *In Vivo* Genome Editing. *Mol. Ther. Methods Clin. Dev.* *12*, 111–122.
37. Nelson, C.E., Wu, Y., Gemberling, M.P., Oliver, M.L., Waller, M.A., Bohning, J.D., Robinson-Hamm, J.N., Bulaklak, K., Castellanos Rivera, R.M., Collier, J.H., et al. (2019). Long-term evaluation of AAV-CRISPR genome editing for Duchenne muscular dystrophy. *Nat. Med.* *25*, 427–432.
38. Wang, L., Yang, Y., Breton, C.A., White, J., Zhang, J., Che, Y., Saveliev, A., McMenamin, D., He, Z., Latshaw, C., et al. (2019). CRISPR/Cas9-mediated in vivo gene targeting corrects hemostasis in newborn and adult factor IX-knockout mice. *Blood* *133*, 2745–2752.
39. Pan, X., Philippen, L., Lahiri, S.K., Lee, C., Park, S.H., Word, T.A., Li, N., Jarrett, K.E., Gupta, R., Reynolds, J.O., et al. (2018). In Vivo Ryr2 Editing Corrects Catecholaminergic Polymorphic Ventricular Tachycardia. *Circ. Res.* *123*, 953–963.
40. Yin, H., Song, C.Q., Dorkin, J.R., Zhu, L.J., Li, Y., Wu, Q., Park, A., Yang, J., Suresh, S., Bizhanova, A., et al. (2016). Therapeutic genome editing by combined viral and non-viral delivery of CRISPR system components in vivo. *Nat. Biotechnol.* *34*, 328–333.
41. Schmidl, C., Rendeiro, A.F., Sheffield, N.C., and Bock, C. (2015). ChIPmentation: fast, robust, low-input ChIP-seq for histones and transcription factors. *Nat. Methods* *12*, 963–965.
42. Foretz, M., Hébrard, S., Leclerc, J., Zarrinpashneh, E., Soty, M., Mithieux, G., Sakamoto, K., Andreelli, F., and Viollet, B. (2010). Metformin inhibits hepatic gluconeogenesis in mice independently of the LKB1/AMPK pathway via a decrease in hepatic energy state. *J. Clin. Invest.* *120*, 2355–2369.
43. Semenkovich, N.P., Planer, J.D., Ahern, P.P., Griffin, N.W., Lin, C.Y., and Gordon, J.I. (2016). Impact of the gut microbiota on enhancer accessibility in gut intraepithelial lymphocytes. *Proc. Natl. Acad. Sci. USA* *113*, 14805–14810.
44. McIntosh, J., Lenting, P.J., Rosales, C., Lee, D., Rabbanian, S., Raj, D., Patel, N., Tuddenham, E.G., Christophe, O.D., McVey, J.H., et al. (2013). Therapeutic levels of FVIII following a single peripheral vein administration of rAAV vector encoding a novel human factor VIII variant. *Blood* *121*, 3335–3344.
45. Lagor, W.R., Johnston, J.C., Lock, M., Vandenberghe, L.H., and Rader, D.J. (2013). Adeno-associated viruses as liver-directed gene delivery vehicles: focus on lipoprotein metabolism. *Methods Mol. Biol.* *1027*, 273–307.
46. Jarrett, K.E., Lee, C., De Giorgi, M., Hurley, A., Gillard, B.K., Doerfler, A.M., Li, A., Pownall, H.J., Bao, G., and Lagor, W.R. (2018). Somatic Editing of Ldlr With Adeno-Associated Viral-CRISPR Is an Efficient Tool for Atherosclerosis Research. *Arterioscler. Thromb. Vasc. Biol.* *38*, 1997–2006.
47. Cradick, T.J., Qiu, P., Lee, C.M., Fine, E.J., and Bao, G. (2014). COSMID: A Web-based Tool for Identifying and Validating CRISPR/Cas Off-target Sites. *Mol. Ther. Nucleic Acids* *3*, e214.
48. Schneider, C.A., Rasband, W.S., and Eliceiri, K.W. (2012). NIH Image to ImageJ: 25 years of image analysis. *Nat. Methods* *9*, 671–675.

**OMTM, Volume 21**

## **Supplemental information**

### **Targeting the *Apoa1* locus**

#### **for liver-directed gene therapy**

**Marco De Giorgi, Ang Li, Ayrea Hurley, Mercedes Barzi, Alexandria M. Doerfler, Nikitha A. Cherayil, Harrison E. Smith, Jonathan D. Brown, Charles Y. Lin, Karl-Dimiter Bissig, Gang Bao, and William R. Lagor**

## List and sequence of plasmids used.

1. 1507-pAAV-U6-*Apoal*-gRNA2-SA-HLP-SaCas9-HA-OLLAS-spA 6968 bp
2. 1729-pAAV-*Apoal*-Target-2A-mKate-pA 4924 bp
3. 1730-pAAV-*Apoal*-Target-2A-*APOE*-pA 5158 bp
4. 1731-pAAV-*Apoal*-Target-2A-*FIX*-pA 5590 bp
5. 1771-pAAV-*Apoal*-Target-2A-*FAH*-pA 5470 bp
6. 1161-pAAV-CB-EGFP 5478 bp

### FASTA sequences:

>1507-pAAV-U6-*Apoal*-gRNA2-SA-HLP-SaCas9-HA-OLLAS-spA 6968 bp

```
CAGCTGCGCGCTCGCTCGCTCACTGAGGCCGCCCGGGCAAAGCCCAGGGCGTCGGGC
GACCTTTGGTTCGCCCGCCTCAGTGAGCGAGCGAGCGCGCAGAGAGGGGAGTGGCCA
ACTCCATCACTAGGGGTTCTTGTAGTTAATGATTAACCCGCCATGCTACTTATCTAC
GTAGCCATGCTCTGGTGTACAAAAAGCAGGCTTTAAAGGAACCAATTCAGTCGAC
TGGATCCGGTACCAAGGTCGGGCAGGAAGAGGGCCTATTTCCCATGATTCCTTCATA
TTTGCATATACGATACAAGGCTGTTAGAGAGATAATTAGAATTAATTTGACTGTAAA
CACAAAGATATTAGTACAAAATACGTGACGTAGAAAGTAATAATTTCTTGGGTAGTT
TGCAGTTTTAAAATTATGTTTTAAAATGGACTATCATATGCTTACCGTAACTTGAAA
GTATTTTCGATTTCTTGGCTTTATATATCTTGTGGAAAGGACGAAACACCGTTTATTGT
AAGAAAGCCAATGCGTTTTAGTACTCTGGAAACAGAATCTACTAAAACAAGGCAAA
ATGCCGTGTTTATCTCGTCAACTTGTGGCGAGATTTTTTTCTAGAAAGCTTTGTTTG
CTGCTTGCAATGTTTGCCATTTTAGGGTGGACACAGGACGCTGTGGTTTTCTGAGCC
AGGGGGCGACTCAGATCCCAGCCAGTGGACTTAGCCCCTGTTTGCTCCTCCGATAAC
TGGGGTGACCTTGGTTAATATTCACCAGCAGCCTCCCCCGTTGCCCTCTGGATCCA
CTGCTTAAATACGGACGAGGACAGGGCCCTGTCTCCTCAGCTTCAGGCACCACCACT
GACCTGGGACAGTGAATCACCGGTGCCACCATGGCCCCAAAGAAGAAGCGGAAGGT
CGGTATCCACGGAGTCCCAGCAGCCAAGCGGAACTACATCCTGGGCCTGGACATCG
GCATCACCAGCGTGGGCTACGGCATCATCGACTACGAGACACGGGACGTGATCGAT
GCCGGCGTGCGGCTGTTCAAAGAGGCCAACGTGGAAAACAACGAGGGCAGGCGGA
GCAAGAGAGGGCGCCAGAAGGCTGAAGCGGCGGAGGCGGCATAGAATCCAGAGAGT
GAAGAAGCTGCTGTTGACTACAACCTGCTGACCGACCACAGCGAGCTGAGCGGCA
TCAACCCCTACGAGGCCAGAGTGAAGGGCCTGAGCCAGAAGCTGAGCGAGGAAGA
GTTCTCTGCCGCCCTGCTGCACCTGGCCAAGAGAAGAGGGCGTGACAACGTGAACG
AGGTGGAAGAGGACACCGGCAACGAGCTGTCCACCAAAGAGCAGATCAGCCGGAA
CAGCAAGGCCCTGGAAGAGAAATACGTGGCCGAACTGCAGCTGGAACGGCTGAAG
AAAGACGGCGAAGTGCGGGGCAGCATCAACAGATTCAAGACCAGCGACTACGTGA
AGAAGCCAAACAGCTGCTGAAGGTGCAGAAGGCCTACCACCAGCTGGACCAGAG
CTTCATCGACACCTACATCGACCTGCTGGAAACCCGGCGGACCTACTATGAGGGACC
TGGCGAGGGCAGCCCCTTCGGCTGGAAGGACATCAAAGAATGGTACGAGATGCTGA
TGGGCCACTGCACCTACTTCCCCGAGGAACTGCGGAGCGTGAAGTACGCCTACAAC
```



GCCGACCTGTACAACGCCCTGAACGACCTGAACAATCTCGTGATCACCAGGGACGA  
GAACGAGAAGCTGGAATATTACGAGAAGTTCCAGATCATCGAGAACGTGTTCAAGC  
AGAAGAAGAAGCCACCCTGAAGCAGATCGCCAAAGAAATCCTCGTGAACGAAGA  
GGATATTAAGGGCTACAGAGTGACCAGCACCGGCAAGCCGAGTTCACCAACCTGA  
AGGTGTACCACGACATCAAGGACATTACCGCCCGGAAAGAGATTATTGAGAACGCC  
GAGCTGCTGGATCAGATTGCCAAGATCCTGACCATCTACCAGAGCAGCGAGGACAT  
CCAGGAAGAACTGACCAATCTGAACTCCGAGCTGACCCAGGAAGAGATCGAGCAGA  
TCTCTAATCTGAAGGGCTATACCGGCACCCACAACCTGAGCCTGAAGGCCATCAACC  
TGATCCTGGACGAGCTGTGGCACACCAACGACAACCAGATCGCTATCTTCAACCGG  
CTGAAGCTGGTGCCCAAGAAGGTGGACCTGTCCCAGCAGAAAGAGATCCCCACCAC  
CCTGGTGGACGACTTCATCCTGAGCCCCGTCGTGAAGAGAAGCTTCATCCAGAGCAT  
CAAAGTGATCAACGCCATCATCAAGAAGTACGGCCTGCCCAACGACATCATTATCG  
AGCTGGCCCGCGAGAAGAACTCCAAGGACGCCAGAAAATGATCAACGAGATGCA  
GAAGCGGAACCGGCAGACCAACGAGCGGATCGAGGAAATCATCCGGACCACCGGC  
AAAGAGAACGCCAAGTACCTGATCGAGAAGATCAAGCTGCACGACATGCAGGAAG  
GCAAGTGCTGTACAGCCTGGAAGCCATCCCTCTGGAAGATCTGCTGAACAACCCCT  
TCAACTATGAGGTGGACCACATCATCCCCAGAAGCGTGTCTTCGACAACAGCTTCA  
ACAACAAGGTGCTCGTGAAGCAGGAAGAAAACAGCAAGAAGGGCAACCGGACCCC  
ATTCCAGTACCTGAGCAGCAGCGACAGCAAGATCAGCTACGAAACCTTCAAGAAGC  
ACATCCTGAATCTGGCCAAGGGCAAGGGCAGAATCAGCAAGACCAAGAAAGAGTAT  
CTGCTGGAAGAACGGGACATCAACAGGTTCTCCGTGCAGAAAGACTTCATCAACCG  
GAACCTGGTGGATACCAGATACGCCACCAGAGGCCTGATGAACCTGCTGCGGAGCT  
ACTTCAGAGTGAACAACCTGGACGTGAAAGTGAAGTCCATCAATGGCGGCTTCACC  
AGCTTTCTGCGGCGGAAGTGGAAAGTTTAAGAAAGAGCGGAACAAGGGGTACAAGCA  
CCACGCCGAGGACGCCCTGATCATTGCCAACGCCGATTTTCATCTTCAAAGAGTGGAA  
GAAACTGGACAAGGCCAAAAAAGTGATGGAAAACCAGATGTTTCGAGGAAAAGCAG  
GCCGAGAGCATGCCCGAGATCGAAACCGAGCAGGAGTACAAAGAGATCTTCATCAC  
CCCCACCAGATCAAGCACATTAAGGACTTCAAGGACTACAAGTACAGCCACCGGG  
TGGACAAGAAGCCTAATAGAGAGCTGATTAACGACACCCTGTACTCCACCCGGAAG  
GACGACAAGGGCAACACCCTGATCGTGAACAATCTGAACGGCCTGTACGACAAGGA  
CAATGACAAGCTGAAAAAGCTGATCAACAAGAGCCCCGAAAAGCTGCTGATGTACC  
ACCACGACCCCCAGACCTACCAGAAACTGAAGCTGATTATGGAACAGTACGGCGAC  
GAGAAGAATCCCCTGTACAAGTACTACGAGGAAACCGGGAACCTGACCAAGTA  
CTCCAAAAAGGACAACGGCCCCGTGATCAAGAAGATTAAGTATTACGGCAACAAAC  
TGAACGCCCATCTGGACATCACCGACGACTACCCAACAGCAGAAACAAGGTCGTG  
AAGCTGTCCCTGAAGCCCTACAGATTCGACGTGTACCTGGACAATGGCGTGTACAAG  
TTCGTGACCGTGAAGAATCTGGATGTGATCAAAAAAGAAAACCTACTACGAAGTGAA  
TAGCAAGTGCTATGAGGAAGCTAAGAAGCTGAAGAAGATCAGCAACCAGGCCGAGT  
TTATCGCCTCCTTCTACAACAACGATCTGATCAAGATCAACGGCGAGCTGTATAGAG  
TGATCGGCGTGAACAACGACCTGCTGAACCGGATCGAAGTGAACATGATCGACATC  
ACCTACCGCGAGTACCTGGAAAACATGAACGACAAGAGGCCCCCCCAGGATCATTA  
GACAATCGCCTCCAAGACCCAGAGCATTAAAGAAGTACAGCACAGACATTCTGGGCA  
ACCTGTATGAAGTGAATCTAAGAAGCACCCCTCAGATCATCAAAAAGGGCAAAAGG

CCGGCGGCCACGAAAAAGGCCGGCCAGGCCAAAAAAGAAAAAGGGATCCTACCCAT  
ACGATGTTCCAGATTACGCTAGCGGCTTCGCCAACGAGCTTGGACCCAGGTTGATGG  
GAAAGTAAGAATTCCTAGAGCGAATAAAAGATCTTTATTTTCATTAGATCTGTGTGT  
TGGTTTTTTGTGTGATGCAGCTACGTAGATAAGTAGCATGGCCGGGTTAATCATTAAAC  
TACAAGGAACCCCTAGTGATGGAGTTGGCCACTCCCTCTCTGCGCGCTCGCTCGCTC  
ACTGAGGCCGGGCGACCAAAGGTCGCCCCGACGCCCGGGCTTTGCCCGGGCGGCCTC  
AGTGAGCGAGCGAGCGCGCAGCTGCATTAATGAATCGGCCAACGCGCGGGGAGAG  
GCGGTTTTGCGTATTGGGCGCTCTTCCGCTTCCTCGCTCACTGACTCGCTGCGCTCGGT  
CGTTCGGCTGCGGCAGCGGTATCAGCTCACTCAAAGGCGGTAATACGGTTATCCAC  
AGAATCAGGGGATAACGCAGGAAAGAACATGTGAGCAAACCAGCAAAAAGGCC  
AGGAACCGTAAAAAGGCCGCGTTGCTGGCGTTTTTCCATAGGCTCCGCCCCCTGAC  
GAGCATCACAAAATCGACGCTCAAGTCAGAGGTGGCGAAACCCGACAGGACTATA  
AAGATACCAGGCGTTTCCCCCTGGAAGCTCCCTCGTGCGCTCTCCTGTTCCGACCCT  
GCCGCTTACCGGATACCTGTCCGCCTTTCTCCCTTCGGGAAGCGTGCGCTTTTCTCAT  
AGCTCACGCTGTAGGTATCTCAGTTCGGTGTAGGTCGTTTCGCTCCAAGCTGGGCTGT  
GTGCACGAACCCCGTTCAGCCCGACCGCTGCGCCTTATCCGGTAACTATCGTCTT  
GAGTCCAACCCGGTAAGACACGACTTATCGCCACTGGCAGCAGCCACTGGTAACAG  
GATTAGCAGAGCGAGGTATGTAGGCGGTGCTACAGAGTTCTTGAAGTGGTGGCCTA  
ACTACGGCTACACTAGAAGGACAGTATTTGGTATCTGCGCTCTGCTGAAGCCAGTTA  
CCTTCGGAAAAAGAGTTGGTAGCTCTTGATCCGGCAAACAAACCACCGCTGGTAGC  
GGTGGTTTTTTTTGTTTGCAAGCAGCAGATTACGCGCAGAAAAAAAGGATCTCAAGA  
AGATCCTTTGATCTTTTCTACGGGGTCTGACGCTCAGTGGAACGAAAACACTCACGTTA  
AGGGATTTTGGTCATGAGATTATCAAAAAGGATCTTCACCTAGATCCTTTTAAATTA  
AAAATGAAGTTTTAAATCAATCTAAAGTATATATGAGTAAACTTGGTCTGACAGTTA  
CCAATGCTTAATCAGTGAGGCACCTATCTCAGCGATCTGTCTATTTTCGTTTCATCCATA  
GTTGCCTGACTCCCCGTCGTGTAGATAACTACGATACGGGAGGGCTTACCATCTGGC  
CCCAGTGCTGCAATGATACCGCGAGACCCACGCTCACCGGCTCCAGATTTATCAGCA  
ATAAACCAGCCAGCCGGAAGGGCCGAGCGCAGAAGTGGTCCTGCAACTTTATCCGC  
CTCCATCCAGTCTATTAATTGTTGCCGGGAAGCTAGAGTAAGTAGTTCGCCAGTTAA  
TAGTTTGCGCAACGTTGTTACCATTACTACAGGCATCGTGGTGTACGCTCGTCGTTT  
GGTATGGCTTCATTCAGCTCCGGTTCCCAACGATCAAGGCGAGTTACATGATCCCCC  
ATGTTGTGCAAAAAAGCGGTTAGCTCCTTCGGTCCTCCGATCGTTGTCAGAAGTAAG  
TTGGCCGCAGTGTTATCACTCATGGTTATGGCAGCACTGCATAATTCTCTTACTGTCA  
TGCCATCCGTAAGATGCTTTTCTGTGACTGGTGAGTACTCAACCAAGTCATTCTGAG  
AATAGTGTATGCGGCGACCGAGTTGCTCTTGCCCCGGCGTCAATACGGGATAATACCG  
CGCCACATAGCAGAACTTTAAAAGTGCTCATCATTGGAAAACGTTCTTCGGGGCGAA  
AACTCTCAAGGATCTTACCACTATTGAGATCCAGTTCGATGTAACCCACTCGTGCAC  
CCAATGATCTTCAGCATCTTTTACTTTACCAGCGTTTCTGGGTGAGCAAAAACAG  
GAAGGCAAAATGCCGCAAAAAGGGAATAAGGGCGACACGGAAATGTTGAATACT  
CATACTCTTCCTTTTTCAATATTATTGAAGCATTTATCAGGGTTATTGTCTCATGAGC  
GGATACATATTTGAATGTATTTAGAAAAATAAACAATAAGGGGTTCCGCGCACATTT  
CCCCGAAAGATGCCACCTGAAATTATAAACGTTAATATTTTGTAAAATTCGCGTTA  
AATTTTTGTAAATCAGCTCATTTTTTAACCAATAGGCCGAAATCGGAAAAATCCCT

TATAAATCAAAGAATAGACCGAGATAGGGTTGAGTGTGTTCCAGTTTGGAAACAA  
GAGTCCACTATTGAGGAACGTGAACTCCAGCGTCAAAGGGCGAAAAACCGTCTATC  
GGGGCGATGGCCACTACGTGAACCATCACCTAATCAAGTTTTTTGGGGTCGAGGT  
GCCGTAAAGCACTAAATCGGAACCCTAAAGGGAGCCCCGATTTAGAGCTTGACGG  
GGAAAGCCGGCGAACGTGGCGAGAAAGGAAGGGAAAGAAAGCGAAAGGAGCGGGC  
GCTAGGGCGCTGGCAAGTGTAGCGGTACGCTGCGCGTAACCACCACACCCGCCGC  
GCTTAATGCGCCGCTACAGGGCGCGTCCCATTCCGCATTCAGGCTGCGCAACTGTTG  
GGAAGGGCGATCGGTGCGGGCCTCTTCGCTATTACGC

>1729-pAAV-*Apoa1*-Target-2A-mKate-pA 4924 bp

CAGCTGCGCGCTCGCTCGCTCACTGAGGCCGCCGGGCAAAGCCCCGGGCGTCGGGC  
GACCTTTGGTCGCCCGCCTCAGTGAGCGAGCGAGCGCGCAGAGAGGGGAGTGGCCA  
ACTCCATCACTAGGGGTTCTTGTAGTTAATGATTAACCCGCCATGCTACTTATCTAC  
GTAGCCATGCTCTGGAAAGCTTCATTAGGGGACAGGTGGCACCCAGCTATCATGTGC  
ATGGATCTGCAGACCAGGGGCAGCGCATGATGCCTGGGCTCGTCTCTCAGCCGCTCT  
CTCCCCCTCTAGCCTGAATCTCCTGGAAAACCTGGGACACTCTGGGTTCAACCGTTA  
GTCAGCTGCAGGAACGGCTGGGCCATTGACTCGGGACTTCTGGGATAACCTGGAG  
AAAGAAACAGATTGGGTGAGACAGGAGATGAACAAGGACCTAGAGGAAGTGAAAC  
AGAAGGTGCAGCCCTACCTGGACGAATTCCAGAAGAAATGGAAAGAGGATGTGGA  
GCTCTACCGCCAGAAGGTGGCGCCTCTGGGCGCCGAGCTGCAGGAGAGCGCGCGCC  
AGAAGCTGCAGGAGCTGCAAGGGAGACTGTCCCCTGTGGCTGAGGAATTTTCGCGAC  
CGCATGCGCACACACGTAGACTCTCTGCGCACACAGCTAGCGCCCCACAGCGAACA  
GATGCGCGAGAGCCTGGCCCAGCGCCTGGCTGAGCTCAAGAGCAACCCTACCTTGA  
ACGAGTACCACACCAGGGCCAAAACCCACCTGAAGACACTTGGCGAGAAAGCCAG  
ACCTGCGCTGGAGGACCTGCGCCATAGTCTGATGCCCATGCTGGAGACGCTTAAGA  
CCCAAGTCCAGAGTGTGATCGACAAGGCCAGCGAGACTCTGACTGCCCAGTCTAGA  
GGAAGCGGAGCCACTAACTTCTCCCTGTTGAAACAAGCAGGGGATGTGGAAGAGAA  
TCCCGGGCCAGTGAGCGAGCTGATTAAGGAGAACATGCACATGAAGCTGTACATGG  
AGGGCACCGTGAACAACCACCACTTCAAGTGCACATCCGAGGGCGAAGGCAAGCCC  
TACGAGGGCACCCAGACCATGAGAATCAAGGCGGTTCGAGGGCGGCCCTCTCCCTT  
CGCCTTCGACATCCTGGCTACCAGCTTCATGTACGGCAGCAAAACCTTCATCAACCA  
CACCCAGGGCATCCCCGACTTCTTTAAGCAGTCCTTCCCCGAGGGCTTCACATGGGA  
GAGAGTCACCACATAACGAAGACGGGGGCGTGCTGACCGCTACCCAGGACACCAGCC  
TCCAGGACGGCTGCCTCATCTACAACGTCAAGATCAGAGGGGTGAACTTCCCATCCA  
ACGGCCCTGTGATGCAGAAGAAAACACTCGGCTGGGAGGCCTCCACCGAGACCCTG  
TACCCCGCTGACGGCGGCCTGGAAGGCAGAGCCGACATGGCCCTGAAGCTCGTGGG  
CGGGGGCCACCTGATCTGCAACTTGAAGACCACATACAGATCCAAGAAACCCGCTA  
AGAACCTCAAGATGCCCGGCGTCTACTATGTGGACAGAAGACTGGAAAGAATCAAG  
GAGGCCGACAAAGAGACCTACGTCGAGCAGCACGAGGTGGCTGTGGCCAGATACTG  
CGACCTCCCTAGCAAACCTGGGGCACAGAGATTACAAGGATGACGATGACAAGTGAA  
CCGGTTCGCGAATAAAAGATCTTTATTTTCATTAGATCTGTGTGTTGGTTTTTTGTGT

GATGCAGCGGTACCCTTCTTTCTTTGGGGGACATAGGGCGGGCGCTAAGGGGACATC  
AAGGGACGTGAGAACATGGTGCCGCACTGGGGATTCTTTGTACGCGACTACTCAG  
CTCTTAACGCTCACTCAAGCTGGGCACCTGGCTGGTTCAGGGTATGAGACAGAATCC  
CTTCTAAGAAGGCTCCAAGGGAAATGGATGGCCAGGCCAAAGCAACAAGGAACCC  
AAAAGGGCCCCACAGAGGCTCAGAACACTAGTGCTGTAAACCAGGATGAGAGTGTC  
TGGCAATAGGACTGGCTTTGAGACCGCTGGTTTCTTGTGCTAGCCGAGTTTCCAGGT  
GGGGTCCAGAGGGTGCAGGACGGGAGCCTCTTCCACTCCCTAGAGCCAGGATTCT  
TCAGGAGCCAGGAAGATTGGAGTTATTGGGTGGGTGCTAATAAAAAGCCTGGAGCT  
GAACCCGATCTCGGTAAACAATTCCCTTTGATCTTTCCCTCCGACGCGTTACGTAGAT  
AAGTAGCATGGCGGGTTAATCATTAACTACAAGGAACCCCTAGTGATGGAGTTGGC  
CACTCCCTCTCTGCGCGCTCGCTCGCTCACTGAGGCCGGGCGACCAAAGGTCGCCCC  
ACGCCCGGGCTTTGCCCGGGCGGCCTCAGTGAGCGAGCGAGCGCGCAGCTGCATTA  
ATGAATCGGCCAACGCGCGGGGAGAGGCGGTTTGCATATTGGGCGCTCTTCCGCTTC  
CTCGCTCACTGACTCGCTGCGCTCGGTCGTTTCGGCTGCGGCGAGCGGTATCAGCTCA  
CTCAAAGGCGGTAATACGGTTATCCACAGAATCAGGGGATAACGCAGGAAAGAACA  
TGTGAGCAAACCCGACAGGACTATAAAGATAACCAGGCGTTTCCCCCTGGAAGCT  
GTTTTTCCATAGGCTCCGCCCCCTGACGAGCATCACAAAATCGACGCTCAAGTCA  
GAGGTGGCGAAACCCGACAGGACTATAAAGATAACCAGGCGTTTCCCCCTGGAAGCT  
CCCTCGTGCGCTCTCCTGTTCCGACCCTGCCGCTTACCGGATACCTGTCCGCCTTCT  
CCCTTCGGGAAGCGTGGCGCTTTCTCATAGCTCACGCTGTAGGTATCTCAGTTCGGT  
GTAGGTCGTTTCGCTCCAAGCTGGGCTGTGTGCACGAACCCCCCGTTCAGCCCGACCG  
CTGCGCCTTATCCGGTAACTATCGTCTTGAGTCCAACCCGGTAAGACACGACTTATC  
GCCACTGGCAGCAGCCACTGGTAACAGGATTAGCAGAGCGAGGTATGTAGGCGGTG  
CTACAGAGTTCTTGAAGTGGTGGCCTAACTACGGCTACACTAGAAGGACAGTATTTG  
GTATCTGCGCTCTGCTGAAGCCAGTTACCTTCGGAAAAAGAGTTGGTAGCTCTTGAT  
CCGGCAAACAAACCACCGCTGGTAGCGGTGGTTTTTTTTGTTTGCAAGCAGCAGATTA  
CGCGCAGAAAAAAGGATCTCAAGAAGATCCTTTGATCTTTTCTACGGGGTCTGACG  
CTCAGTGGAAACGAAAACCTCACGTTAAGGGATTTTGGTTCATGAGATTATCAAAAAGG  
ATCTTCACCTAGATCCTTTTAAATTAATAAATGAAGTTTTAAATCAATCTAAAGTATAT  
ATGAGTAAACTTGGTCTGACAGTTACCAATGCTTAATCAGTGAGGCACCTATCTCAG  
CGATCTGTCTATTTTCGTTTCATCCATAGTTGCCTGACTCCCCGTCGTGTAGATAACTAC  
GATACGGGAGGGCTTACCATCTGGCCCCAGTGCTGCAATGATACCGCGAGACCCAC  
GCTCACCGGCTCCAGATTTATCAGCAATAAACCAGCCAGCCGGAAGGGCCGAGCGC  
AGAAGTGGTCCTGCAACTTTATCCGCCTCCATCCAGTCTATTAATTGTTGCCGGGAA  
GCTAGAGTAAGTAGTTCGCCAGTTAATAGTTTGCGCAACGTTGTTACCATTACTACA  
GGCATCGTGGTGTACGCTCGTCGTTTGGTATGGCTTCATTACGCTCCGGTTCCCAAC  
GATCAAGGCGAGTTACATGATCCCCCATGTTGTGCAAAAAAGCGGTTAGCTCCTTCCG  
GTCCTCCGATCGTTGTCAGAAGTAAGTTGGCCGACAGTGTTATCACTCATGGTTATGG  
CAGCACTGCATAATTCTCTTACTGTCATGCCATCCGTAAGATGCTTTTCTGTGACTGG  
TGAGTACTCAACCAAGTCATTCTGAGAATAGTGTATGCGGCGACCGAGTTGCTCTTG  
CCCGGCGTCAATACGGGATAATACCGCGCCACATAGCAGAACTTTAAAAGTGCTCA  
TCATTGGAACGTTCTTCGGGGCGAAAACCTCTCAAGGATCTTACCACTATTGAGAT  
CCAGTTCGATGTAACCCACTCGTGCACCCAACCTGATCTTCAGCATCTTTTACTTTCAC

CAGCGTTTCTGGGTGAGCAAAAACAGGAAGGCAAAATGCCGCAAAAAGGGAATA  
AGGGCGACACGGAAATGTTGAATACTCATACTCTTCCTTTTTCAATATTATTGAAGC  
ATTTATCAGGGTTATTGTCTCATGAGCGGATACATATTTGAATGTATTTAGAAAAAT  
AAACAAATAGGGGTTCGCGCACATTTCCCGAAAGATGCCACCTGAAATTATAAA  
CGTTAATATTTTGTAAAATTCGCGTTAAATTTTTGTAAATCAGCTCATTTTTTAAC  
CAATAGGCCGAAATCGGAAAAATCCCTTATAAATCAAAGAATAGACCGAGATAGG  
GTTGAGTGTTGTTCCAGTTTGAACAAGAGTCCACTATTGAGGAACGTGAACTCCAG  
CGTCAAAGGGCGAAAAACCGTCTATCGGGGCGATGGCCACTACGTGAACCATCAC  
CCTAATCAAGTTTTTTGGGGTCGAGGTGCCGTAAAGCACTAAATCGGAACCCTAAAG  
GGAGCCCCGATTTAGAGCTTGACGGGGAAAGCCGGCGAACGTGGCGAGAAAGGA  
AGGGAAGAAAGCGAAAGGAGCGGGCGCTAGGGCGCTGGCAAGTGTAGCGGTCACG  
CTGCGCGTAACCACCACACCCGCCGCGCTTAATGCGCCGCTACAGGGGCGCGTCCCAT  
TCGCCATTAGGCTGCGCAACTGTTGGGAAGGGCGATCGGTGCGGGCCTCTTCGCTA  
TTACGC

>1730-pAAV-*Apoa1*-Target-2A-*APOE*-pA 5158 bp

CAGCTGCGCGCTCGCTCGCTCACTGAGGCCGCCGGGCAAAGCCCGGGCGTCGGGC  
GACCTTTGGTCGCCCGCCTCAGTGAGCGAGCGAGCGCGCAGAGAGGGAGTGGCCA  
ACTCCATCACTAGGGGTTCCCTGTAGTTAATGATTAACCCGCCATGCTACTTATCTAC  
GTAGCCATGCTCTGGAAAGCTTCATTAGGGGACAGGTGGCACCCAGCTATCATGTGC  
ATGGATCTGCAGACCAGGGGCAGCGCATGATGCCTGGGCTCGTCTCTCAGCCGCTCT  
CTTCCCCCTCTAGCCTGAATCTCCTGGAAAACCTGGGACACTCTGGGTTC AACCGTTA  
GTCAGCTGCAGGAACGGCTGGGCCATTGACTCGGGACTTCTGGGATAACCTGGAG  
AAAGAAACAGATTGGGTGAGACAGGAGATGAACAAGGACCTAGAGGAAGTGA AAC  
AGAAGGTGCAGCCCTACCTGGACGAATTCCAGAAGAAATGGAAAGAGGATGTGGA  
GCTCTACCGCCAGAAGGTGGCGCCTCTGGGCGCCGAGCTGCAGGAGAGCGCGCGCC  
AGAAGCTGCAGGAGCTGCAAGGGAGACTGTCCCCTGTGGCTGAGGAATTTTCGCGAC  
CGCATGCGCACACACGTAGACTCTCTGCGCACACAGCTAGCGCCCCACAGCGAAC A  
GATGCGCGAGAGCCTGGCCAGCGCCTGGCTGAGCTCAAGAGCAACCCTACCTTGA  
ACGAGTACCACACCAGGGCCAAAACCCACCTGAAGACACTTGGCGAGAAAGCCAG  
ACCTGCGCTGGAGGACCTGCGCCATAGTCTGATGCCCATGCTGGAGACGCTTAAGA  
CCCAAGTCCAGAGTGTGATCGACAAGGCCAGCGAGACTCTGACTGCCCAGTCTAGA  
GGAAGCGGAGCCACTA ACTTCTCCCTGTTGAAACAAGCAGGGGATGTGCAAGAGAA  
TCCCGGGCCAATGAAGGTTCTGTGGGCTGCGTTGCTGGTCACATTCCTGGCAGGATG  
CCAGGCCAAGGTGGAGCAAGCGGTGGAGACAGAGCCGGAGCCCGAGCTGCGCCAG  
CAGACCGAGTGGCAGAGCGGCCAGCGCTGGGAACTGGCACTGGGTGCTTTTTGGGA  
TTACCTGCGCTGGGTGCGACACTGTCTGAGCAGGTGCAGGAGGAGCTGCTCAGCTC  
CCAGGTCACCCAGGAACTGAGGGCGCTGATGGACGAGACCATGAAGGAGTTGAAGG  
CCTACAAATCGGAACTGGAGGAACA ACTGACCCCGGTGGCGGAGGAGACGCGGGC  
ACGGCTGTCCAAGGAGCTGCAGGCGGCGCAGGCCCGGCTGGGCGCGGACATGGAG  
GACGTGTGCGGCCGCCTGGTGCAGTACCGCGGCGAGGTGCAGGCCATGCTCGGCCA

GAGCACCGAGGAGCTGCGGGTGCGCCTCGCCTCCCACCTGCGCAAGCTGCGTAAGC  
GGCTCCTCCGCGATGCCGATGACCTGCAGAAGCGCCTGGCAGTGTACCAGGCCGGG  
GCCCCGAGGGCGCCGAGCGCGGCCTCAGCGCCATCCGCGAGCGCCTGGGGCCCCT  
GGTGAACAGGGCCGCGTGCGGGGCCCACTGTGGGCTCCCTGGCCGGCCAGCCGC  
TACAGGAGCGGGCCCAGGCCTGGGGCGAGCGGCTGCGCGCGCGGATGGAGGAGAT  
GGGCAGCCGGACCCGCGACCCGCCTGGACGAGGTGAAGGAGCAGGTGGCGGAGGTG  
CGCGCCAAGCTGGAGGAGCAGGCCAGCAGATACGCCTGCAGGCCGAGGCCTTCCA  
GGCCCCGCTCAAGAGCTGGTTCGAGCCCCTGGTGGAAAGACATGCAGCGCCAGTGGG  
CCGGGCTGGTGGAGAAGGTGCAGGCTGCCGTGGGCACCAGCGCCGCCCTGTGCC  
AGCGACAATCACTGAACCGGTTTCGGAATAAAAGATCTTTATTTTCATTAGATCTGT  
GTGTTGGTTTTTTGTGTGATGCAGCGGTACCCTTCTTTCTTTGGGGGACATAGGGCGG  
GCGCTAAGGGGACATCAAGGGACGTGAGAACATGGTGCCGCACTGGGGATTCCCTT  
GTACGCGACTACTCAGCTCTTAACGCTCACTCAAGCTGGGCACCTGGCTGGTTCAGG  
GTATGAGACAGAATCCCTTCCTAAGAAGGCTCCAAGGGAAATGGATGGCCAGGCCAA  
AGCAACAAGGAACCCCAAAGGGCCCCACAGAGGCTCAGAACACTAGTGCTGTAA  
ACCAGGATGAGAGTGTCTGGCAATAGGACTGGCTTTGAGACCGCTGGTTTCTTGTGC  
TAGCCGAGTTTCCAGGTGGGGTCCAGAGGGTGCAGGACGGGAGCCTCTTCCACTCC  
CTAGAGCCAGGATTCCCTCAGGAGCCAGGAAGATTGGAGTTATTGGGTGGGTGCTA  
ATAAAAAGCCTGGAGCTGAACCCGATCTCGGTAAACAATTCCCTTTGATCTTTCCCT  
CCGACGCGTTACGTAGATAAGTAGCATGGCGGGTTAATCATTAACTACAAGGAACC  
CCTAGTGATGGAGTTGGCCACTCCCTCTCTGCGCGCTCGCTCGCTCACTGAGGCCGG  
GCGACCAAAGGTCGCCCGACGCCGGGCTTTGCCCGGGCGGCCTCAGTGAGCGAGC  
GAGCGCGCAGCTGCATTAATGAATCGGCCAACGCGCGGGGAGAGGCGGTTTTCGTA  
TTGGGCGCTCTTCCGCTTCTCGCTCACTGACTCGCTGCGCTCGGTTCGTTCCGGCTGCG  
GCGAGCGGTATCAGCTCACTCAAAGGCGGTAATACGGTTATCCACAGAATCAGGGG  
ATAACGCAGGAAAGAACATGTGAGCAAAACCGCAGCAAAAGGCCAGGAACCGTAA  
AAAGGCCGCGTTGCTGGCGTTTTTCCATAGGCTCCGCCCCCTGACGAGCATCACAA  
AAATCGACGCTCAAGTCAGAGGTGGCGAAACCCGACAGGACTATAAAGATAACCAGG  
CGTTTCCCCCTGGAAGCTCCCTCGTGCGCTCTCCTGTTCCGACCCTGCCGCTTACCGG  
ATACCTGTCCGCTTTTCTCCCTTCGGGAAGCGTGGCGCTTTCTCATAGCTCACGCTGT  
AGGTATCTCAGTTCGGTGTAGGTCGTTTCGCTCCAAGCTGGGCTGTGTGCACGAACCC  
CCCGTTCAGCCCGACCGCTGCGCCTTATCCGGTAACTATCGTCTTGAGTCCAACCCG  
GTAAGACACGACTTATCGCCACTGGCAGCAGCCACTGGTAACAGGATTAGCAGAGC  
GAGGTATGTAGGCGGTGCTACAGAGTTCTTGAAGTGGTGGCCTAACTACGGCTACAC  
TAGAAGGACAGTATTTGGTATCTGCGCTCTGCTGAAGCCAGTTACCTTCGGAAAAAG  
AGTTGGTAGCTCTTGATCCGGCAAACAACCACCGCTGGTAGCGGTGGTTTTTTTTGT  
TTGCAAGCAGCAGATTACGCGCAGAAAAAAGGATCTCAAGAAGATCCTTTGATCT  
TTTCTACGGGGTCTGACGCTCAGTGGAACGAAAACACTCACGTTAAGGGATTTTGGTCA  
TGAGATTATCAAAAAGGATCTTCACCTAGATCCTTTTAAATTAATAAATGAAGTTTAA  
AATCAATCTAAAGTATATATGAGTAAACTTGGTCTGACAGTTACCAATGCTTAATCA  
GTGAGGCACCTATCTCAGCGATCTGTCTATTTTCGTTTCATCCATAGTTGCCTGACTCCC  
CGTCGTGTAGATAACTACGATACGGGAGGGCTTACCATCTGGCCCCAGTGCTGCAAT  
GATACCGCGAGACCCACGCTCACCGGCTCCAGATTTATCAGCAATAAACCAGCCAG

CCGGAAGGGCCGAGCGCAGAAGTGGTCCTGCAACTTTATCCGCCTCCATCCAGTCTA  
TTAATTGTTGCCGGAAGCTAGAGTAAGTAGTTCGCCAGTTAATAGTTTTCGCAACG  
TTGTTACCATTACTACAGGCATCGTGGTGTACGCTCGTCGTTTGGTATGGCTTCATT  
CAGCTCCGGTTCCCAACGATCAAGGCGAGTTACATGATCCCCATGTTGTGCAAAAA  
AGCGGTTAGCTCCTTCGGTCCTCCGATCGTTGTCAGAAGTAAGTTGGCCGAGTGTT  
ATCACTCATGGTTATGGCAGCACTGCATAATTCTCTTACTGTCATGCCATCCGTAAG  
ATGCTTTTCTGTGACTGGTGAGTACTCAACCAAGTCATTCTGAGAATAGTGTATGCG  
GCGACCGAGTTGCTCTTGCCCGGCGTCAATACGGGATAATACCGCGCCACATAGCA  
GAACTTTAAAAGTGCTCATCATTGGAAAACGTTCTTCGGGGCGAAAACCTCTCAAGGA  
TCTTACCCTATTGAGATCCAGTTCGATGTAACCCACTCGTGCACCCAACTGATCTTC  
AGCATCTTTTACTTTCACCAGCGTTTCTGGGTGAGCAAAAACAGGAAGGCAAAATGC  
CGCAAAAAGGGAATAAGGGCGACACGGAAATGTTGAATACTCATACTCTTCCTTTT  
TCAATATTATTGAAGCATTATCAGGGTTATTGTCTCATGAGCGGATACATATTTGA  
ATGTATTTAGAAAAATAAACAAATAGGGGTTCCGCGCACATTTCCCCGAAAGATGC  
CACCTGAAATTATAAACGTTAATATTTTGTAAAATTCGCGTTAAATTTTGTAAAT  
CAGCTCATTTTTTAACCAATAGGCCGAAATCGGAAAAATCCCTTATAAATCAAAGA  
ATAGACCGAGATAGGGTTGAGTGTGTTCCAGTTTGAACAAGAGTCCACTATTGAG  
GAACGTGAACTCCAGCGTCAAAGGGCGAAAAACCGTCTATCGGGGCGATGGCCAC  
TACGTGAACCATCACCTAATCAAGTTTTTTGGGGTCGAGGTGCCGTAAAGCACTAA  
ATCGGAACCCTAAAGGGAGCCCCGATTTAGAGCTTGACGGGGAAAGCCGGCGAAC  
GTGGCGAGAAAGGAAGGGAAGAAAGCGAAAGGAGCGGGCGCTAGGGCGCTGGCAA  
GTGTAGCGGTCACGCTGCGCGTAACCACCACACCCGCCGCGCTTAATGCGCCGCTAC  
AGGGCGCGTCCCATTCCGCAATCAGGCTGCGCAACTGTTGGGAAGGGCGATCGGTG  
CGGGCCTCTTCGCTATTACGC

>1731-pAAV-*Apoal*-Target-2A-*FIX*-pA 5590 bp

CAGCTGCGCGCTCGCTCGCTCACTGAGGCCGCCCGGGCAAAGCCCAGGGCGTCGGGC  
GACCTTTGGTGCCCCGGCCTCAGTGAGCGAGCGAGCGCGCAGAGAGGGAGTGGCCA  
ACTCCATCACTAGGGGTTCCCTTGTTAGTTAATGATTAACCCGCCATGCTACTTATCTAC  
GTAGCCATGCTCTGGAAAGCTTCATTAGGGGACAGGTGGCACCCAGCTATCATGTGC  
ATGGATCTGCAGACCAGGGGCAGCGCATGATGCCTGGGCTCGTCTCTCAGCCGCTCT  
CTTCCCCCTTAGCCTGAATCTCCTGGAAAACCTGGGACACTCTGGGTTCAACCGTTA  
GTCAGCTGCAGGAACGGCTGGGCCCATTGACTCGGGACTTCTGGGATAACCTGGAG  
AAAGAAACAGATTGGGTGAGACAGGAGATGAACAAGGACCTAGAGGAAGTGAAAC  
AGAAGGTGCAGCCCTACCTGGACGAATTCCAGAAGAAATGGAAAGAGGATGTGGA  
GCTCTACCGCCAGAAGGTGGCGCCTCTGGGCGCCGAGCTGCAGGAGAGCGCGCGCC  
AGAAGCTGCAGGAGCTGCAAGGGGAGACTGTCCCCTGTGGCTGAGGAATTTTCGCGAC  
CGCATGCGCACACACGTAGACTCTCTGCGCACACAGCTAGCGCCCCACAGCGAACA  
GATGCGCGAGAGCCTGGCCAGCGCCTGGCTGAGCTCAAGAGCAACCCTACCTTGA  
ACGAGTACCACACCAGGGCCAAAACCCACCTGAAGACACTTGGCGAGAAAGCCAG  
ACCTGCGCTGGAGGACCTGCGCCATAGTCTGATGCCCATGCTGGAGACGCTTAAGA

CCCAAGTCCAGAGTGTGATCGACAAGGCCAGCGAGACTCTGACTGCCAGTCTAGA  
GGAAGCGGAGCCACTAACTTCTCCCTGTTGAAACAAGCAGGGGATGTCTGAAGAGAA  
TCCCGGGCCAATGCAGCGCGTGAACATGATCATGGCAGAATCACCAGGCCTCATCA  
CCATCTGCCTTTTAGGATATCTACTCAGTGCTGAATGTACAGTTTTTCTTGATCATGA  
AAACGCCAACAAAATTCTGAATCGGCCAAAGAGGTATAATTCAGGTAAATTGGAAG  
AGTTTGTTC AAGGGAACCTTGAGAGAGAATGTATGGAAGAAAAGTGTAGTTTTGAA  
GAAGCACGAGAAGTTTTTGA AACACTGAAAGAACA ACTGAATTTTGAAGCAGTA  
TGTTGATGGAGATCAGTGTGAGTCCAATCCATGTTTAAATGGCGGCAGTTGCAAGGA  
TGACATTAATTCCTATGAATGTTGGTGTCCCTTTGGATTTGAAGGAAAGA ACTGTGA  
ATTAGATGTAACATGTAACATTAAGAATGGCAGATGCGAGCAGTTTTGTAAAAATA  
GTGCTGATAACAAGGTGGTTTGCTCCTGTACTGAGGGATATCGACTTGCAGAAAACC  
AGAAGTCCTGTGAACCAGCAGTGCCATTTCCATGTGGAAGAGTTTCTGTTTCACAAA  
CTTCTAAGCTCACCCGTGCTGAGACTGTTTTTCTGATGTGGACTATGTAAATTCTAC  
TGAAGCTGAAACCATTTTGGATAACATCACTCAAAGCACCCAATCATTTAATGACTT  
CACTCGGGTTGTTGGTGGAGAAGATGCCAAACCAGGTCAATTCCTTGGCAGGTTGT  
TTTGAATGGTAAAGTTGATGCATTCTGTGGAGGCTCTATCGTTAATGAAAATGGAT  
TGTA ACTGCTGCCACTGTGTTGAAACTGGTGTAAAATTACAGTTGTTCGCAGGTGA  
ACATAATATTGAGGAGACAGAACATACAGAGCAAAGCGAAATGTGATTCTGAATTA  
TTCCTCACCACA ACTACAATGCAGCTATTAATAAGTACAACCATGACATTGCCCTTC  
TGGA ACTGGACGAACCCTTAGTGCTAAACAGCTACGTTACACCTATTTGCATTGCTG  
ACAAGGAATACACGAACATCTTCCTCAAATTTGGATCTGGCTATGTAAGTGGCTGGG  
GAAGAGTCTTCCACAAAGGGAGATCAGCTTTAGTTCTTCAGTACCTTAGAGTTCCAC  
TTGTTGACCGAGCCACATGTCTTCGATCTACAAAGTTCACCATCTATAACAACATGT  
TCTGTGCTGGCTTCCATGAAGGAGGTAGAGATTCATGTCAAGGAGATAGTGGGGGA  
CCCCATGTTACTGAAGTGGAAAGGGACCAGTTTCTTAACTGGAATTATTAGCTGGGGT  
GAAGAGTGTGCAATGAAAGGCAAATATGGAATATATACCAAGGTATCCCGGTATGT  
CAACTGGATTAAGGAAAAACAAGCTCACTTAAACCGGTTTCGCGAATAAAAAGATC  
TTTATTTTCATTAGATCTGTGTGTTGGTTTTTTGTGTGATGCAGCGGTACCCTTCTTC  
TTTGGGGGACATAGGGCGGGCGCTAAGGGGACATCAAGGGACGTGAGAACATGGTG  
CCGCACTGGGGATTCCTTTGTACGCGACTACTCAGCTCTTAAACGCTCACTCAAGCTG  
GGCACCTGGCTGGTTCAGGGTATGAGACAGAATCCCTTCCTAAGAAGGCTCCAAGG  
GAAATGGATGGCCAGGCAAAGCAAACAAGGAACCCCAAAAAGGGCCCCACAGAGGCT  
CAGAACACTAGTGCTGTAAACCAGGATGAGAGTGTCTGGCAATAGGACTGGCTTTG  
AGACCGCTGGTTTTCTTGTGCTAGCCGAGTTTTCCAGGTGGGGTCCAGAGGGTGCAGGA  
CGGGAGCCTCTTCCACTCCCTAGAGCCAGGATTCCTTCAGGAGCCAGGAAGATTGG  
AGTTATTGGGTGGGTGCTAATAAAAAGCCTGGAGCTGAACCCGATCTCGGTAAACA  
ATTCCTTTGATCTTTCCCTCCGACGCGTTACGTAGATAAGTAGCATGGCGGGTTAAT  
CATTAACTACAAGGAACCCCTAGTGATGGAGTTGGCCACTCCCTCTCTGCGCGCTCG  
CTCGCTCACTGAGGCCGGGGCGACCAAAGGTCGCCCGACGCCCGGGCTTTGCCCGGG  
CGGCCTCAGTGAGCGAGCGAGCGCAGCTGCATTAATGAATCGGCCAACGCGCGG  
GGAGAGGCGGTTTGCATATTGGGCGCTCTTCCGCTTCCTCGCTCACTGACTCGCTGC  
GCTCGGTCGTTCCGGCTGCGGCGAGCGGTATCAGCTCACTCAAAGGCGGTAATACGGT  
TATCCACAGAATCAGGGGATAACGCAGGAAAGAACATGTGAGCAAACCGCAGCA



AAAGGCCAGGAACCGTAAAAAGGCCGCGTTGCTGGCGTTTTTCCATAGGCTCCGCC  
CCCCTGACGAGCATCACAAAATCGACGCTCAAGTCAGAGGTGGCGAAACCCGACA  
GGACTATAAAGATACCAGGCGTTTCCCCCTGGAAGCTCCCTCGTGCGCTCTCCTGTT  
CCGACCCTGCCGCTTACCGGATACCTGTCCGCTTTCTCCCTTCGGGAAGCGTGGCG  
CTTTCTCATAGCTCACGCTGTAGGTATCTCAGTTCGGTGTAGGTGCTTCGCTCCAAGC  
TGGGCTGTGTGCACGAACCCCCGTTTCAGCCCGACCGCTGCGCCTTATCCGGTAACT  
ATCGTCTTGAGTCCAACCCGGTAAGACACGACTTATCGCCACTGGCAGCAGCCACTG  
GTAACAGGATTAGCAGAGCGAGGTATGTAGGCCGGTGTACAGAGTTCCTGAAGTGG  
TGGCCTAACTACGGCTACACTAGAAGGACAGTATTTGGTATCTGCGCTCTGCTGAAG  
CCAGTTACCTTCGGAAAAAGAGTTGGTAGCTCTTGATCCGGCAAACAAACCACCGCT  
GGTAGCGGTGGTTTTTTTTGTTTGCAAGCAGCAGATTACGCGCAGAAAAAAGGATCT  
CAAGAAGATCCTTTGATCTTTTCTACGGGGTCTGACGCTCAGTGGAACGAAAACCTCA  
CGTTAAGGGATTTTGGTCATGAGATTATCAAAAAGGATCTTCACCTAGATCCTTTTA  
AATTA AAAATGAAGTTTTAAATCAATCTAAAGTATATATGAGTAAACTTGGTCTGAC  
AGTTACCAATGCTTAATCAGTGAGGCACCTATCTCAGCGATCTGTCTATTTTCGTTTCAT  
CCATAGTTGCCTGACTCCCCGTCGTGTAGATAACTACGATACGGGAGGGCTTACCAT  
CTGGCCCCAGTGCTGCAATGATACCGCGAGACCCACGCTCACCGGCTCCAGATTTAT  
CAGCAATAAACCAGCCAGCCGGAAGGGCCGAGCGCAGAAGTGGTCCTGCAACTTTA  
TCCGCCTCCATCCAGTCTATTAATTGTTGCCGGGAAGCTAGAGTAAGTAGTTCGCCA  
GTAAATAGTTTGCGCAACGTTGTTACCATTACTACAGGCATCGTGGTGTACAGCTCG  
TCGTTTGGTATGGCTTCATTCAGCTCCGGTTCCCAACGATCAAGGCGAGTTACATGA  
TCCCCCATGTTGTGCAAAAAAGCGGTTAGCTCCTTCGGTCCTCCGATCGTTGTCAGA  
AGTAAGTTGGCCGCAGTGTTATCACTCATGGTTATGGCAGCACTGCATAATTCTCTT  
ACTGTCATGCCATCCGTAAGATGCTTTTCTGTGACTGGTGAGTACTCAACCAAGTCA  
TTCTGAGAATAGTGTATGCGGCGACCGAGTTGCTCTTGCCCGGCGTCAATACGGGAT  
AATACCGCGCCACATAGCAGA ACTTTAAAAGTGCTCATCATTGGAAAACGTTCTTCG  
GGGCGAAA ACTCTCAAGGATCTTACCACTATTGAGATCCAGTTCGATGTAACCCACT  
CGTGCACCCAACTGATCTTCAGCATCTTTTACTTTACCAGCGTTTCTGGGTGAGCAA  
AAACAGGAAGGCAAAATGCCGCAAAAAGGGAATAAGGGCGACACGGAAATGTTG  
AATACTCATACTCTTCCTTTTTCAATATTATTGAAGCATTATCAGGGTTATTGTCTC  
ATGAGCGGATACATATTTGAATGTATTTAGAAAAATAAACAAATAGGGGTCCGCG  
CACATTTCCCCGAAAGATGCCACCTGAAATTATAAACGTTAATATTTTGTAAAATT  
CGCGTTAAATTTTTGTAAAATCAGCTCATTTTTTAACCAATAGGCCGAAATCGGAAA  
AATCCCTTATAAATCAAAAAGAATAGACCGAGATAGGGTTGAGTGTTGTTCCAGTTTG  
GAACAAGAGTCCACTATTGAGGAACGTGAACTCCAGCGTCAAAGGGCGAAAAACCG  
TCTATCGGGGCGATGGCCCACTACGTGAACCATCACCTAATCAAGTTTTTTGGGGT  
CGAGGTGCCGTAAGCACTAAATCGGAACCCTAAAGGGAGCCCCGATTTAGAGCT  
TGACGGGGAAAGCCGGCGAACGTGGCGAGAAAGGAAGGGAAAGAAAGCGAAAGGA  
GCGGGCGCTAGGGCGCTGGCAAGTG TAGCGGTCACGCTGCGCGTAACCACCACACC  
CGCCGCGCTTAATGCGCCGCTACAGGGCGCGTCCCATTCGCCATTCAGGCTGCGCAA  
CTGTTGGGAAGGGCGATCGGTGCGGGCCTCTTCGCTATTACGC

>1771-pAAV-Apoa1-Target-2A-FAH-pA 5470 bp

CAGCTGCGCGCTCGCTCGCTCACTGAGGCCGCCCGGGCAAAGCCCCGGGCGTCCGGC  
GACCTTTGGTCGCCCCGGCCTCAGTGAGCGAGCGAGCGCGCAGAGAGGGGAGTGGCCA  
ACTCCATCACTAGGGGTTCTTGTAGTTAATGATTAACCCGCCATGCTACTTATCTAC  
GTAGCCATGCTCTGGAAAGCTTCATTAGGGGACAGGTGGCACCCAGCTATCATGTGC  
ATGGATCTGCAGACCAGGGGCAGCGCATGATGCCTGGGCTCGTCTCTCAGCCGCTCT  
CTTCCCCCTCTAGCCTGAATCTCCTGGAAAACCTGGGACACTCTGGGTTC AACCGTTA  
GTCAGCTGCAGGAACGGCTGGGCCATTGACTCGGGACTTCTGGGATAACCTGGAG  
AAAGAAACAGATTGGGTGAGACAGGAGATGAACAAGGACCTAGAGGAAGTGAAAC  
AGAAGGTGCAGCCCTACCTGGACGAATTCCAGAAGAAATGGAAAGAGGATGTGGA  
GCTCTACCGCCAGAAGGTGGCGCCTCTGGGCGCCGAGCTGCAGGAGAGCGCGCGCC  
AGAAGCTGCAGGAGCTGCAAGGGAGACTGTCCCCTGTGGCTGAGGAATTTTCGCGAC  
CGCATGCGCACACACGTAGACTCTCTGCGCACACAGCTAGCGCCCCACAGCGAACA  
GATGCGCGAGAGCCTGGCCAGCGCCTGGCTGAGCTCAAGAGCAACCCTACCTTGA  
ACGAGTACCACACCAGGGCCAAAACCCACCTGAAGACACTTGGCGAGAAAGCCAG  
ACCTGCGCTGGAGGACCTGCGCCATAGTCTGATGCCCATGCTGGAGACGCTTAAGA  
CCCAAGTCCAGAGTGTGATCGACAAGGCCAGCGAGACTCTGACTGCCCAGTCTAGA  
GGAAGCGGAGCCACTA ACTTCTCCCTGTTGAAACAAGCAGGGGATGTCTGAAGAGAA  
TCCCGGGCCAGGATCCATGTCCTTCATTCTGTGCTGAAGACAGCGATTTCCCTATT  
CATAACCTCCCTTATGGAGTGTTCAGCACAAGGGGCGACCCAAGACCGAGGATAGG  
TGTGGCCATTGGCGACCAGATCCTGGACCTCAGCATCATCAAGCACCTCTTTACTGG  
TCCTGTCTCTCCAAACACCAGGATGTCTTCAATCAGCCTACACTCAACAGCTTCAT  
GGGCCTGGGTGAGGCTGCCTGGAAGGAGGCGAGAGTGTCTTGCAGAACTTGCTGT  
CTGTGAGCCAAGCCAGGCTCAGAGATGACACCGAACTTCGGAAGTGTGCATTCATCT  
CCCAGGCTTCTGCCACGATGCACCTTCCAGCCACCATAGGAGACTATACCGATTTTT  
ACAGCAGCAGACAGCACGCCACAAATGTGGGCATTATGTTTCAGAGATAAAGAGAAC  
GCCCTGATGCCTAATTGGCTGCACTTACCAGTGGGCTACCATGGCCGTGCCTCCTCT  
GTCGTGGTGTCTGGCACCCCAATCCGAAGGCCCATGGGACAGATGAAACCTGATGA  
CTCTAAGCCTCCCGTATATGGTGCCTGCAAGCTCTTGGACATGGAGCTGGAAATGGC  
TTTTTTTGTAGGCCCTGGAAACAGATTGGGAGAGCCGATCCCCATTTCCAAGGCCCA  
TGAGCACATTTTTTGAATGGTCCTTATGAACGACTGGAGTGCACGAGACATTCAGAA  
GTGGGAGTATGTCCCTCTCGGGCCATTCCTTGGGAAGAGTTTTGGGACCACTGTCTC  
TCCGTGGGTGGTGCCCATGGATGCTCTCATGCCCTTTGCTGTGCCCAACCCGAAGCA  
GGACCCAGGCCCTGCCGTATCTGTGCCATGACGAGCCCTACACATTTGACATCAA  
CCTCTCTGTTAACCTGAAAGGAGAAGGAATGAGCCAGGCGGCTACCATATGCAAGT  
CCAATTTTAAGTACATGTACTGGACGATGCTGCAGCAGCTCACTCACCCTCTGTCA  
ACGGCTGCAACCTGCGGCCGGGGGACCTCCTGGCTTCTGGGACCATCAGCGGGCCG  
GAGCCAGAAAACCTTCGGCTCCATGTTGGAACGTGTCGTGGAAGGGAACGAAGCCCAT  
AGACCTGGGGAATGGTCAGACCAGGAAGTTTCTGCTGGACGGGGATGAAGTCATCA  
TAACAGGGTACTGCCAGGGGGATGGTTACCGCATCGGCTTTGGCCAGTGTGCTGGA  
AAAGTGCTGCCTGCTCTCCTGCCATCATGAACCGGTTTCGCGAATAAAAGATCTTTAT  
TTTCATTAGATCTGTGTGTTGGTTTTTTGTGTGATGCAGCGGTACCCTTCTTTCTTTGG  
GGGACATAGGGCGGGCGCTAAGGGGACATCAAGGGACGTGAGAACATGGTGCCGC

ACTGGGGATTCCCTTTGTACGCGACTACTCAGCTCTTAACGCTCACTCAAGCTGGGCA  
CCTGGCTGGTTCAGGGTATGAGACAGAATCCCTTCCTAAGAAGGCTCCAAGGGAAA  
TGGATGGCCAGGCAAAGCAACAAGGAACCCCAAAAGGGCCCCACAGAGGCTCAGA  
ACACTAGTGCTGTAAACCAGGATGAGAGTGTCTGGCAATAGGACTGGCTTTGAGAC  
CGCTGGTTTCTTGTGCTAGCCGAGTTTCCAGGTGGGGTCCAGAGGGTGCAGGACGGG  
AGCCTCTTCCACTCCCTAGAGCCAGGATTCCCTCAGGAGCCAGGAAGATTGGAGTTA  
TTGGGTGGGTGCTAATAAAAAGCCTGGAGCTGAACCCGATCTCGGTAAACAATTCCC  
TTTGATCTTTCCCTCCGACGCGTTACGTAGATAAGTAGCATGGCGGGTTAATCATT  
ACTACAAGGAACCCCTAGTGATGGAGTTGGCCACTCCCTCTCTGCGCGCTCGCTCGC  
TCACTGAGGCCGGGCGACCAAAGGTCGCCGACGCCGGGCTTTGCCCGGGCGGCC  
TCAGTGAGCGAGCGAGCGCGCAGCTGCATTAATGAATCGGCCAACGCGCGGGGAGA  
GGCGGTTTGCGTATTGGGCGCTCTTCCGCTTCCCTCGCTCACTGACTCGCTGCGCTCGG  
TCGTTCCGCTGCGGCGAGCGGTATCAGCTCACTCAAAGGCGGTAATACGGTTATCCA  
CAGAATCAGGGGATAACGCAGGAAAGAACATGTGAGCAAACCGCAGCAAAGGC  
CAGGAACCGTAAAAAGGCCGCGTTGCTGGCGTTTTTCCATAGGCTCCGCCCCCTGA  
CGAGCATCAGAAAATCGACGCTCAAGTCAGAGGTGGCGAAACCCGACAGGACTAT  
AAAGATAACAGGCGTTTCCCCTGGAAGCTCCCTCGTGCGCTCTCCTGTTCCGACCC  
TGCCGCTTACCGGATACCTGTCCGCTTTCTCCCTTCGGGAAGCGTGGCGCTTTCTCA  
TAGCTCACGCTGTAGGTATCTCAGTTCGGTGTAGGTCGTTTCGCTCCAAGCTGGGCTG  
TGTGCACGAACCCCCGTTACAGCCCGACCGCTGCGCCTTATCCGGTAACTATCGTCT  
TGAGTCCAACCCGTAAGACACGACTTATCGCCACTGGCAGCAGCCACTGGTAACA  
GGATTAGCAGAGCGAGGTATGTAGGCGGTGCTACAGAGTTCTTGAAGTGGTGGCCT  
AACTACGGCTACACTAGAAGGACAGTATTTGGTATCTGCGCTCTGCTGAAGCCAGTT  
ACCTTCGGAAAAAGAGTTGGTAGCTCTTGATCCGGCAAACAAACCACCGCTGGTAG  
CGGTGGTTTTTTTTGTTTGCAAGCAGCAGATTACGCGCAGAAAAAAGGATCTCAAGA  
AGATCCTTTGATCTTTTCTACGGGGTCTGACGCTCAGTGGAACGAAAACACTCACGTTA  
AGGGATTTTGGTCATGAGATTATCAAAAAGGATCTTCACCTAGATCCTTTTAAATTA  
AAAATGAAGTTTTAAATCAATCTAAAGTATATATGAGTAAACTTGGTCTGACAGTTA  
CCAATGCTTAATCAGTGAGGCACCTATCTCAGCGATCTGTCTATTTTCGTTTCATCCATA  
GTTGCCTGACTCCCCGTCGTGTAGATAACTACGATACGGGAGGGCTTACCATCTGGC  
CCCAGTGCTGCAATGATACCGCGAGACCCACGCTCACCGGCTCCAGATTTATCAGCA  
ATAAACCAGCCAGCCGGAAGGGCCGAGCGCAGAAGTGGTCCTGCAACTTTATCCGC  
CTCCATCCAGTCTATTAATTGTTGCCGGGAAGCTAGAGTAAGTAGTTCGCCAGTTAA  
TAGTTTGCGCAACGTTGTTACCATTACTACAGGCATCGTGGTGTACGCTCGTCGTTT  
GGTATGGCTTCATTCAGCTCCGTTCCCAACGATCAAGGCGAGTTACATGATCCCCC  
ATGTTGTGCAAAAAAGCGGTTAGCTCCTTCGGTCCTCCGATCGTTGTCAGAAGTAAG  
TTGGCCGCAGTGTTATCACTCATGGTTATGGCAGCACTGCATAATTCTCTTACTGTCA  
TGCCATCCGTAAGATGCTTTTCTGTGACTGGTGAGTACTCAACCAAGTCATTCTGAG  
AATAGTGTATGCGGCGACCGAGTTGCTCTTGCCCGGCGTCAATACGGGATAATACCG  
CGCCACATAGCAGAACTTTAAAAGTGCTCATCATTGGAAAACGTTCTTCGGGGCGAA  
AACTCTCAAGGATCTTACCACTATTGAGATCCAGTTCGATGTAACCCACTCGTGCAC  
CCAATGATCTTCAGCATCTTTTACTTTACCAGCGTTTCTGGGTGAGCAAAAACAG  
GAAGGCAAAATGCCGCAAAAAAGGGAATAAGGGCGACACGGAAATGTTGAATACT

CATACTCTTCCTTTTTCAATATTATTGAAGCATTTATCAGGGTTATTGTCTCATGAGC  
GGATACATATTTGAATGTATTTAGAAAAATAAACAAATAGGGGTTCCGCGCACATTT  
CCCCGAAAGATGCCACCTGAAATTATAAACGTTAATATTTTGTTAAAATTCGCGTTA  
AATTTTTGTTAAATCAGCTCATTTTTTAACCAATAGGCCGAAATCGGAAAAATCCCT  
TATAAATCAAAGAATAGACCGAGATAGGGTTGAGTGTGTTCCAGTTTGGAACAA  
GAGTCCACTATTGAGGAACGTGAACTCCAGCGTCAAAGGGCGAAAAACCGTCTATC  
GGGGCGATGGCCCACTACGTGAACCATCACCTAATCAAGTTTTTTGGGGTTCGAGGT  
GCCGTAAAGCACTAAATCGGAACCCTAAAGGGAGCCCCGATTTAGAGCTTGACGG  
GGAAAGCCGGCGAACGTGGCGAGAAAGGAAGGAAGAAAGCGAAAGGAGCGGGC  
GCTAGGGCGCTGGCAAGTGTAGCGGTACGCTGCGCGTAACCACCACACCCGCCGC  
GCTTAATGCGCCGCTACAGGGCGCGTCCATTCGCCATTCAGGCTGCGCAACTGTTG  
GGAAGGGCGATCGGTGCGGGCCTCTTCGCTATTACGC

>1161-pAAV-CB-EGFP 5478 bp

CTGCGCGCTCGCTCGCTCACTGAGGCCGCCCGGGCAAAGCCCGGGCGTCGGGGCGAC  
CTTTGGTTCGCCCGCCTCAGTGAGCGAGCGAGCGCGCAGAGAGGGAGTGCCAACT  
CCATCACTAGGGGTTCTTGTAGTTAATGATTAACCCGCCATGCTACTTATCTACGTA  
GCCATGCTCTAGGAAGATCGGAATTCGCCCTTAAGCTAGTATGCCAAGTACGCCCC  
TATTGACGTCAATGACGGTAAATGGCCCGCCTGGCATTATGCCCAGTACATGACCTT  
ATGGGACTTTCCTACTTGGCAGTACATCTACTCGAGGCCACGTTCTGCTTCACTCTCC  
CCATCTCCCCCCCCCTCCCCACCCCAATTTTGTATTTATTTATTTTTAATTATTTTGT  
GCAGCGATGGGGGGCGGGGGGGGGGGCGCGCGCCAGGCGGGGCGGGGCGGGGCGA  
GGGGCGGGGCGGGGCGAGGCGGAGAGGTGCGGCGGCAGCCAATCAGAGCGGGCGCG  
CTCCGAAAGTTTCCTTTTATGGCGAGGCGGCGGCGGCGGCCCTATAAAAAGCG  
AAGCGCGCGGGCGGGCGGGAGCGGGATCAGAATGATCTGATATCATCGATGAATTCG  
AGCTCGGTACCCGGGGATCCTCTAGAGTCGAGGAACTGAAAAACCAGAAAGTTAAC  
TGGTAAGTTTAGTCTTTTTGTCTTTTATTTTCAAGTCCCGGATCCGGTGGTGGTGCAA  
TCAAAGAACTGCTCCTCAGTGGATGTTGCCTTTACTTCTAGGGAAGTTGGTTCGTGAG  
GCACTGGGCAGGTAAGTATCAAGGTTACAAGACAGGTTTAAGGAGACCAATAGAAA  
CTGGGCTTGTGCGAGACAGAGAAGACTCTTGCCTTCTGATAGGCACCTATTGGTCTT  
ACTGACATCCACTTTGCCTTTCTCTCCACAGGTGTCCAGGCGGCCGCCATGGTGAGC  
AAGGGCGAGGAGCTGTTACCCGGGGTGGTGCCCATCCTGGTCGAGCTGGACGGCGA  
CGTAAACGGCCACAAGTTCAGCGTGTCCGGCGAGGGCGAGGGCGATGCCACCTACG  
GCAAGCTGACCCTGAAGTTCATCTGCACCACCGGCAAGCTGCCCGTGCCCTGGCCCA  
CCCTCGTGACCACCCTGACCTACGGCGTGCAGTGCTTCAGCCGCTACCCCGACCACA  
TGAAGCAGCACGACTTCTTCAAGTCCGCCATGCCCGAAGGCTACGTCCAGGAGCGC  
ACCATCTTCTTCAAGGACGACGGCAACTACAAGACCCGCGCCGAGGTGAAGTTCGA  
GGGCGACACCCTGGTGAACCGCATCGAGCTGAAGGGCATCGACTTCAAGGAGGACG  
GCAACATCCTGGGGCACAAGCTGGAGTACAACACTACAACAGCCACAACGTCTATATC  
ATGGCCGACAAGCAGAAGAACGGCATCAAGGTGAACTTCAAGATCCGCCACAACAT  
CGAGGACGGCAGCGTGCAGCTCGCCGACCACTACCAGCAGAACACCCCATCGGCG

ACGGCCCCGTGCTGCTGCCCCGACAACCACTACCTGAGCACCCAGTCCGCCCTGAGCA  
AAGACCCCAACGAGAAGCGCGATCACATGGTCCTGCTGGAGTTCGTGACCGCCGCC  
GGGATCACTCTCGGCATGGACGAGCTGTACAAGTAATAAGCTTGGATCCAATCAAC  
CTCTGGATTACAAAATTTGTGAAAGATTGACTGGTATTCTTAACTATGTTGCTCCTTT  
TACGCTATGTGGATACGCTGCTTTAATGCCTTTGTATCATGCTATTGCTTCCCGTATG  
GCTTTCATTTTCTCCTCCTTGTATAAATCCTGGTTGCTGTCTCTTTATGAGGAGTTGTG  
GCCCCGTTGTCAGGCAACGTGGCGTGGTGTGCACTGTGTTTGTGCTGACGCAACCCCCAC  
TGTTTGGGGCATTGCCACCACCTGTCAGCTCCTTTCCGGGACTTTCGCTTTCCCCCTC  
CCTATTGCCACGGCGGAACATCGCCGCCTGCCTTGCCCGCTGCTGGACAGGGGCT  
CGGCTGTTGGGCACTGACAATCCGTGGTGTGTCGGGGAAATCATCGTCCTTTCCCTT  
GGCTGCTCGCCTGTGTTGCCACCTGGATTCTGCGCGGGACGTCCTTCTGCTACGTCCC  
TTCGGCCCTCAATCCAGCGGACCTTCTTCCC CGGGCCTGCTGCCGGCTCTGCGGCC  
TCTTCCGCGTCTTCGAGATCTGCCTCGACTGTGCCTTCTAGTTGCCAGCCATCTGTTG  
TTTGGCCCCCCCCGTGCCTTCTTGACCCTGGAAGGTGCCACTCCC ACTGTCCTTTC  
CTAATAAAATGAGGAAATTGCATCGCATTGTCTGAGTAGGTGTCATTCTATTCTGGG  
GGGTGGGGTGGGGCAGGACAGCAAGGGGGAGGATTGGGAAGACAATAGCAGGCAT  
GCTGGGGACTCGAGTTAAGGGCGAATTCCCGATAAGGATCTTCTAGAGCATGGCT  
ACGTAGATAAGTAGCATGGCGGGTTAATCATTAACTACAAGGAACCCCTAGTGATG  
GAGTTGGCCACTCCCTCTCTGCGCGCTCGCTCGCTCACTGAGGCCGGGCGACCAAAG  
GTCGCCCCGACGCCCGGGCTTTGCCCGGGCGGCCTCAGTGAGCGAGCGAGCGCGCAG  
CCTTAATTAACCTAATTC ACTGGCCGTCGTTTTACAACGTCGTGACTGGGAAAACCC  
TGGCGTTACCCA ACTTAATCGCCTTG CAGCACATCCCCCTTTCGCCAGCTGGCGTAA  
TAGCGAAGAGGCCCGCACCGATCGCCCTTCCAACAGTTGCGCAGCATGAATGGCG  
AATGGGACGCGCCCTGTAGCGGCGCATTAAAGCGCGGGCGGGTGTGGTGGTTACGCGC  
AGCGTGACCGCTACACTTGCCAGCGCCCTAGCGCCCCGCTCCTTTCGCTTTCTTCCCTT  
CCTTTCTCGCCACGTTTCGCCGGCTTTCCCCGTCAAGCTCTAAATCGGGGGCTCCCTTT  
AGGGTTCCGATTTAGTGCTTTACGGCACCTCGACCCCAAAAACTTGATTAGGGTGA  
TGGTTCACGTAGTGGGCCATCGCCCTGATAGACGGTTTTTTCGCCCTTTGACGTTGGA  
GTCCACGTTCTTTAATAGTGGACTCTTGTTC AACTGGAACAACACTCAACCCTAT  
CTCGGTCTATTCTTTTGATTTATAAGGGATTTTGCCGATTTTCGGCCTATTGGTTAAAA  
AATGAGCTGATTTAACAAAAATTTAACGCGAATTTTAACAAAATATTAACGCTTACA  
ATTTAGGTGGCACTTTTCGGGGAAATGTGCGCGGAACCCCTATTTGTTTATTTTTCTA  
AATACATTCAAATATGTATCCGCTCATGAGACAATAACCCTGATAAATGCTTCAATA  
ATATTGAAAAAGGAAGAGTATGAGTATTCAACATTTCCGTGTCGCCCTTATTCCCTT  
TTTTGCGGCATTTTGCTTCCCTGTTTTTTGCTACCCAGAAACGCTGGTGAAAGTAAAA  
GATGCTGAAGATCAGTTGGGTGCACGAGTGGGTACATCGAACTGGATCTCAACAG  
CGGTAAGATCCTTGAGAGTTTTTCGCCCCGAAGAACGTTTTTCCAATGATGAGCACTTT  
TAAAGTTCTGCTATGTGGCGCGGTATTATCCCGTATTGACGCCGGGCAAGAGCAACT  
CGGTCGCCGCATACACTATTCTCAGAATGACTTGGTTGAGTACTACCAGTCACAGA  
AAAGCATCTTACGGATGGCATGACAGTAAGAGAATTATGCAGTGCTGCCATAACCA  
TGAGTGATAACACTGCGGCCAACTTACTTCTGACAACGATCGGAGGACCGAAGGAG  
CTAACCGCTTTTTTGCACAACATGGGGGATCATGTA ACTCGCCTTGATCGTTGGGAA  
CCGGAGCTGAATGAAGCCATAACCAAACGACGAGCGTGACACCACGATGCCTGTAGC

AATGGCAACAACGTTGCGCAAACCTATTAACCTGGCGAACTACTTACTCTAGCTTCCCG  
GCAACAATTAATAGACTGGATGGAGGCGGATAAAGTTGCAGGACCACTTCTGCGCT  
CGGCCCTTCCGGCTGGCTGGTTTATTGCTGATAAATCTGGAGCCGGTGAGCGTGGGT  
CTCGCGGTATCATTGCAGCACTGGGGCCAGATGGTAAGCCCTCCCGTATCGTAGTTA  
TCTACACGACGGGGAGTCAGGCAACTATGGATGAACGAAATAGACAGATCGCTGAG  
ATAGGTGCCTCACTGATTAAGCATTGGTAACCTGTCAGACCAAGTTTACTCATATATA  
CTTTAGATTGATTTAAAACCTTCATTTTTAATTTAAAAGGATCTAGGTGAAGATCCTTT  
TTGATAATCTCATGACCAAAAATCCCTTAACGTGAGTTTTTCGTTCCACTGAGCGTCAG  
ACCCCGTAGAAAAGATCAAAGGATCTTCTTGAGATCCTTTTTTTCTGCGCGTAATCT  
GCTGCTTGCAAACAAAAAACACCGCTACCAGCGGTGGTTTGTGTTGCCGGATCAAG  
AGCTACCAACTCTTTTTCCGAAGGTAACCTGGCTTCAGCAGAGCGCAGATACCAAATA  
CTGTTCTTCTAGTGTAGCCGTAGTTAGGCCACCACTTCAAGAACTCTGTAGCACCGC  
CTACATACCTCGCTCTGCTAATCCTGTTACCAGTGGCTGCTGCCAGTGGCGATAAGT  
CGTGTCTTACCGGGTTGGACTCAAGACGATAGTTACCGGATAAAGGCGCAGCGGTGCG  
GGCTGAACGGGGGGTTCGTGCACACAGCCCAGCTTGGAGCGAACGACCTACACCGA  
ACTGAGATACCTACAGCGTGAGCTATGAGAAAGCGCCACGCTTCCCGAAGGGAGAA  
AGGCGGACAGGTATCCGGTAAGCGGCAGGGTTCGGAACAGGAGAGCGCACGAGGGA  
GCTTCCAGGGGGAAACGCCTGGTATCTTTATAGTCTGTGCGGGTTTCGCCACCTCTG  
ACTTGAGCGTCGATTTTTGTGATGCTCGTCAGGGGGGCGGAGCCTATGGAAAAACGC  
CAGCAACGCGGCCTTTTTACGGTTCCTGGCCTTTTGCTGGCCTTTTGCTCACATGTTT  
TTTCTGCGTTATCCCCTGATTCTGTGGATAACCGTATTACCGCCTTTGAGTGAGCTG  
ATACCGCTCGCCGCAGCCGAACGACCGAGCGCAGCGAGTCAGTGAGCGAGGAAGC  
GGAAGAGCGCCAATACGCAAACCGCCTCTCCCCGCGCGTTGGCCGATTCATTAATG  
CAGCTGGCACGACAGGTTTCCCGACTGGAAAGCGGGCAGTGAGCGCAACGCAATTA  
ATGTGAGTTAGCTCACTCATTAGGCACCCCAGGCTTTACACTTTATGCTTCCGGCTCG  
TATGTTGTGTGGAATTGTGAGCGGATAACAATTTACACAGGAAACAGCTATGACCA  
TGATTACGCCAGATTTAATTAAGG

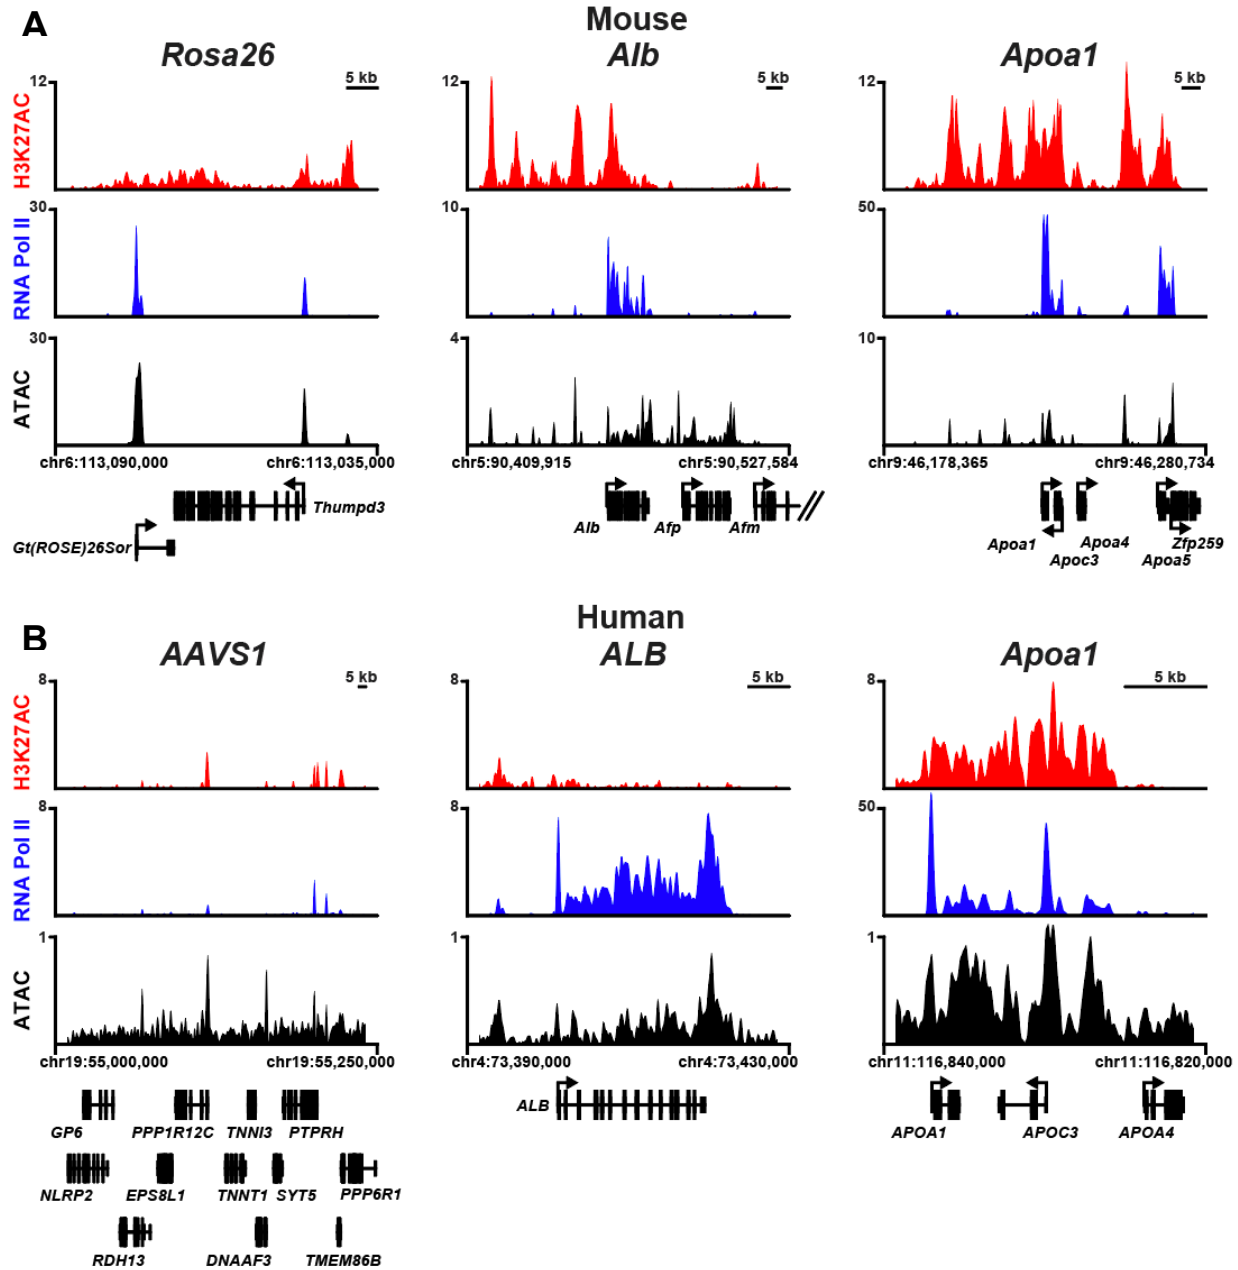

**Figure S1: High chromatin accessibility and active transcription at the *Apoa1* locus in mouse and human liver.** (A) ChIP-seq profile of histone H3K27 acetylation, RNA Polymerase II binding, and ATAC-seq chromatin accessibility for a safe harbor locus (*Rosa26*), and select loci for genes that are highly expressed in murine liver (*Alb* and *Apoa1*). (B) ChIP-seq profiling and ATAC-sequencing for a safe harbor locus, adeno-associated virus integration site 1 (*AAVS1*) as well as the same highly expressed loci (*ALB*, *APOA1*) in human hepatocytes from an adult female liver from the ENCODE database.

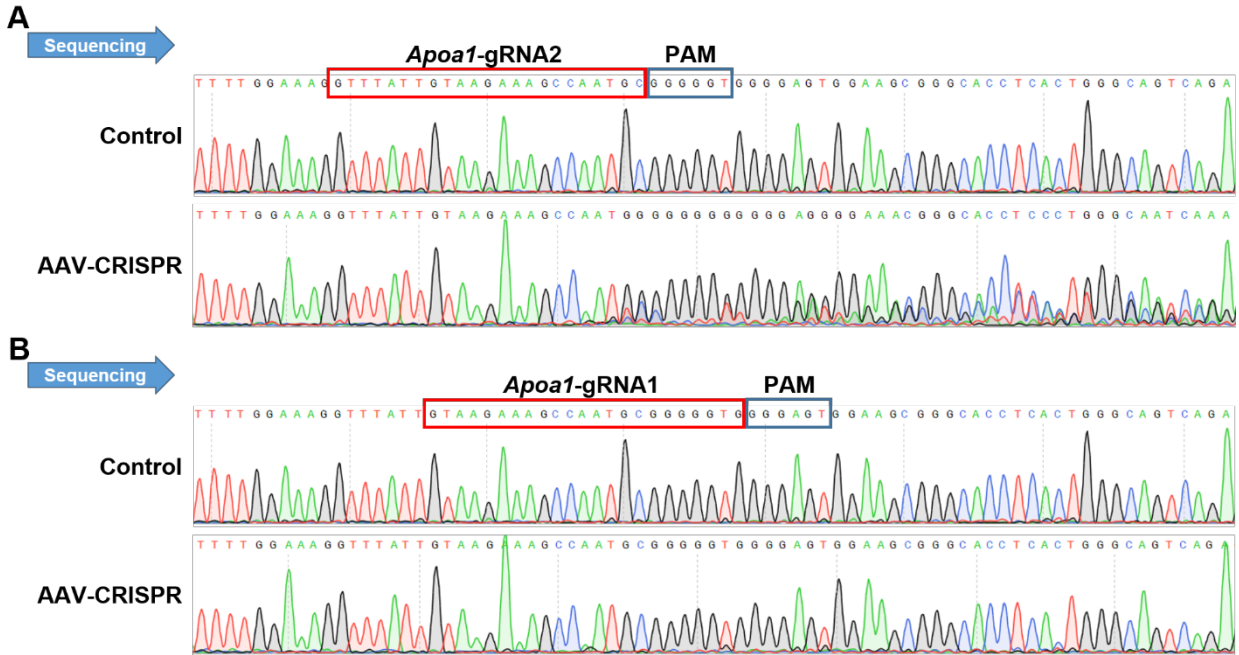

**Figure S2: Screening of gRNAs for targeting *Apoa1* 3'UTR.** (A) Sanger sequencing chromatograms of *Apoa1* 3'UTR showed multiple sequence traces in liver of AAV-CRISPR-injected mice due to NHEJ-derived indel formation. (B) *Apoa1*-gRNA1 failed in inducing indel formation. Control: wild type *Apoa1* 3'UTR sequence. gRNA and PAM sequences are marked in red and blue, respectively. Sequencing direction is indicated by the arrow.



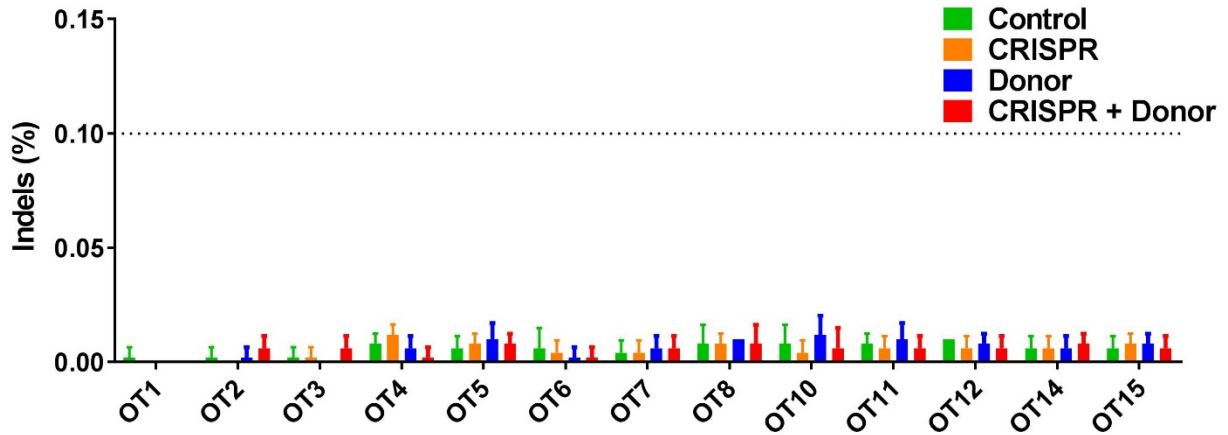

**Figure S3: No detectable Off Target (OT) activity of the SaCas9 gRNA targeting the *ApoA1* 3'UTR.** Deep sequencing analysis of indel formation rate in off target sites predicted by COSMID. Data are shown as mean  $\pm$  standard deviation (n=5). A one-way ANOVA followed by Tukey test revealed no significant differences for OTs among groups. All the indel formation rates are below the limit of detection (0.1%).

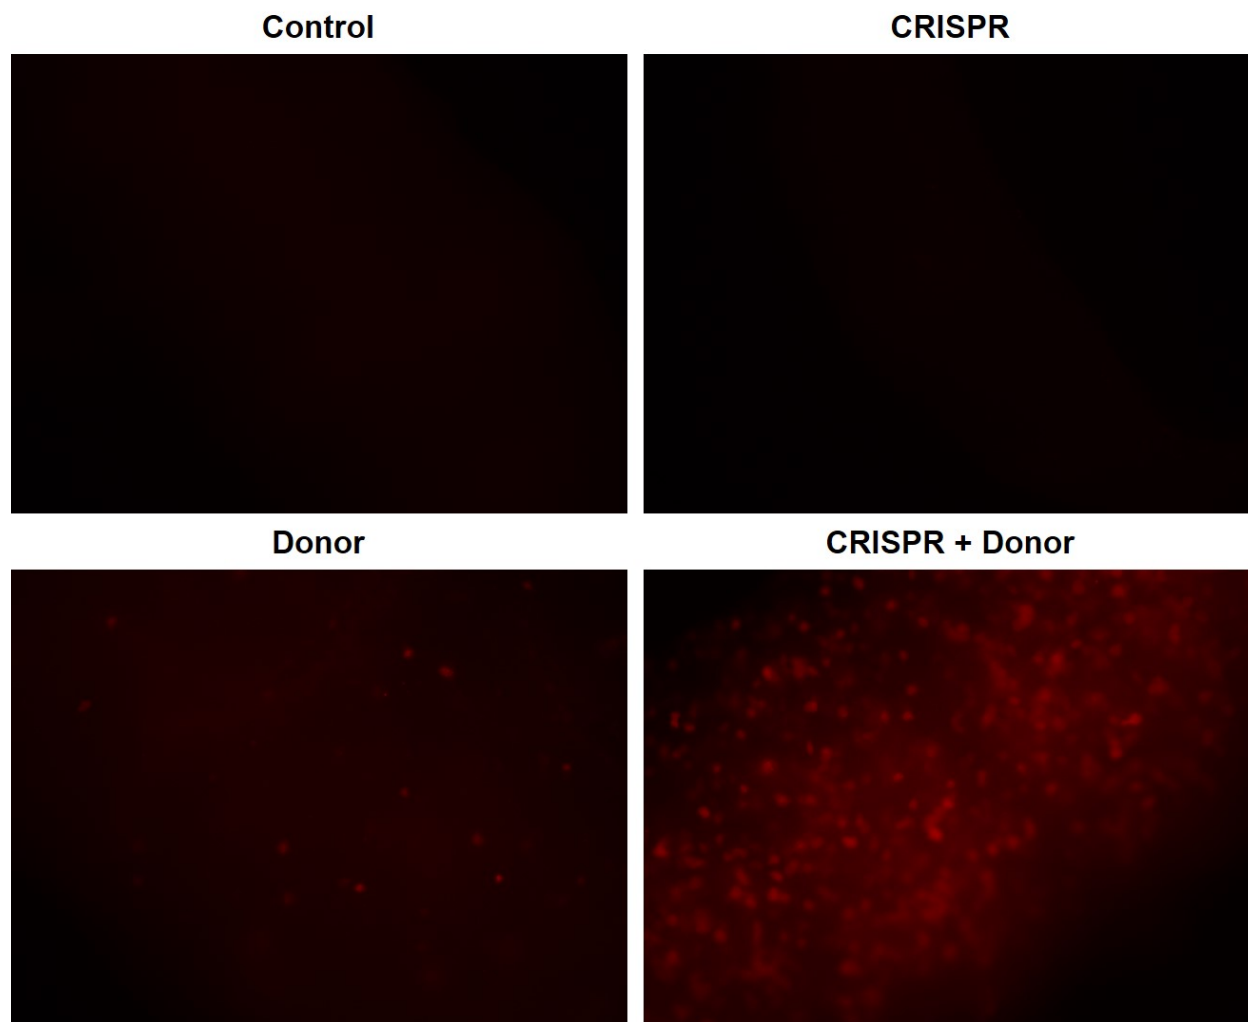

**Figure S4: Efficient expression of mKate2 in *ApoA1*-targeted mice.** Direct mKate2 fluorescence in fresh liver slices from *ApoA1*-targeted mice. A 10x objective lens and 80 ms exposure time were used.

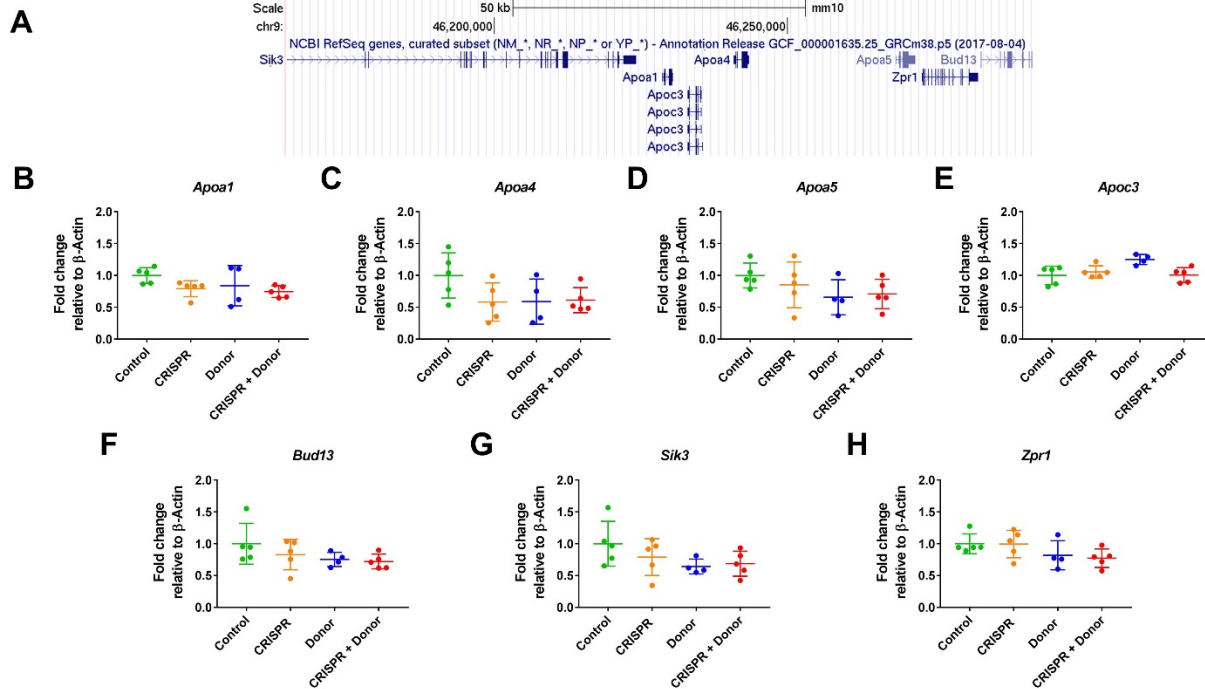

**Figure S5: Targeting of *Apoa1* does not adversely affect expression of neighboring genes.** (A) Schematic diagram of *Apoa1* and neighboring loci on Chromosome 9 by UCSC genome browser (*Mus Musculus* genome assembly GRCm38/mm10). Expression of *Apoa1* (B) and neighboring genes at the *Apoa1* locus by qPCR: (C) Apolipoprotein a4 (*Apoa4*), (D) Apolipoprotein a5 (*Apoa5*), (E) Apolipoprotein c3 (*Apoc3*), (F) *Bud13*, (G) SIK family kinase 3 (*Sik3*) and (H) Zinc finger protein 1 (*Zpr1*). Data are expressed as fold change relative to  $\beta$ -Actin and shown as mean  $\pm$  standard deviation (n=5 for all groups except for Donor, n=4). A one-way ANOVA followed by Tukey test revealed no significant differences among groups in all the panels.

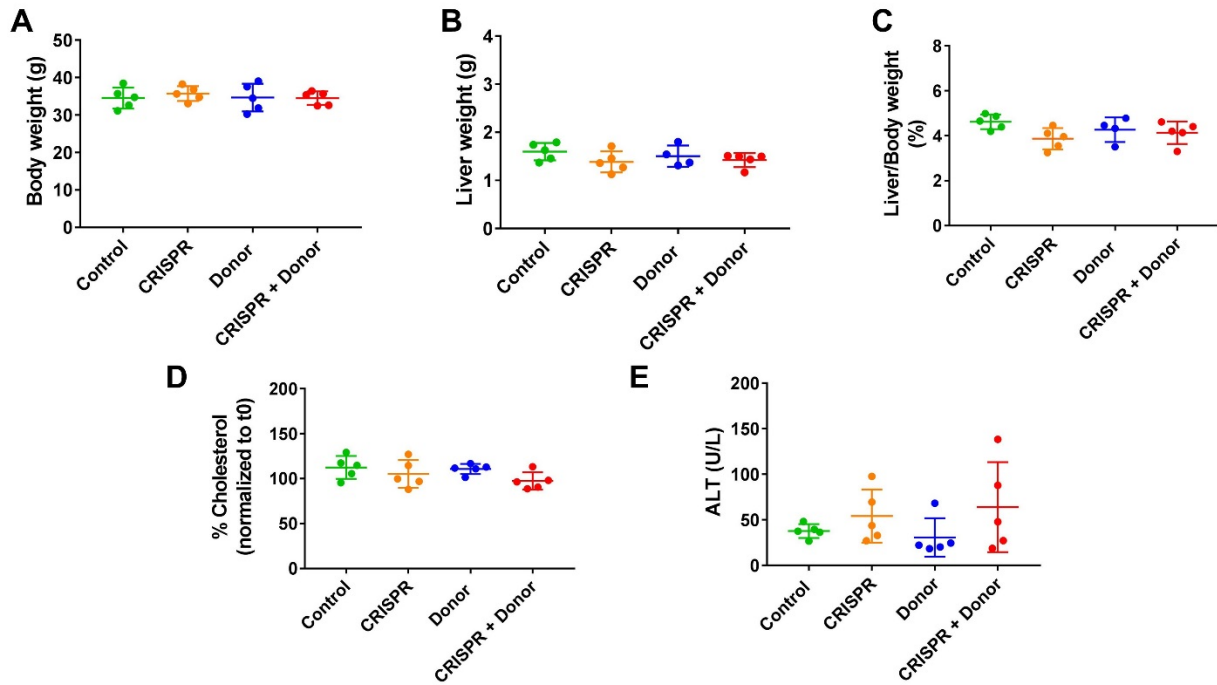

**Figure S6: Targeting of *ApoA1* is safe and well-tolerated.** (A) Body and (B) liver weights at 12 weeks post-AAV injection. (C) Liver/body weight ratios. (D) Total plasma cholesterol levels normalized to baseline at time 0. (E) ALT levels in plasma at endpoint. Data are shown as mean  $\pm$  standard deviation (n=5). A one-way ANOVA followed by Tukey test revealed no significant differences among groups in all the panels.

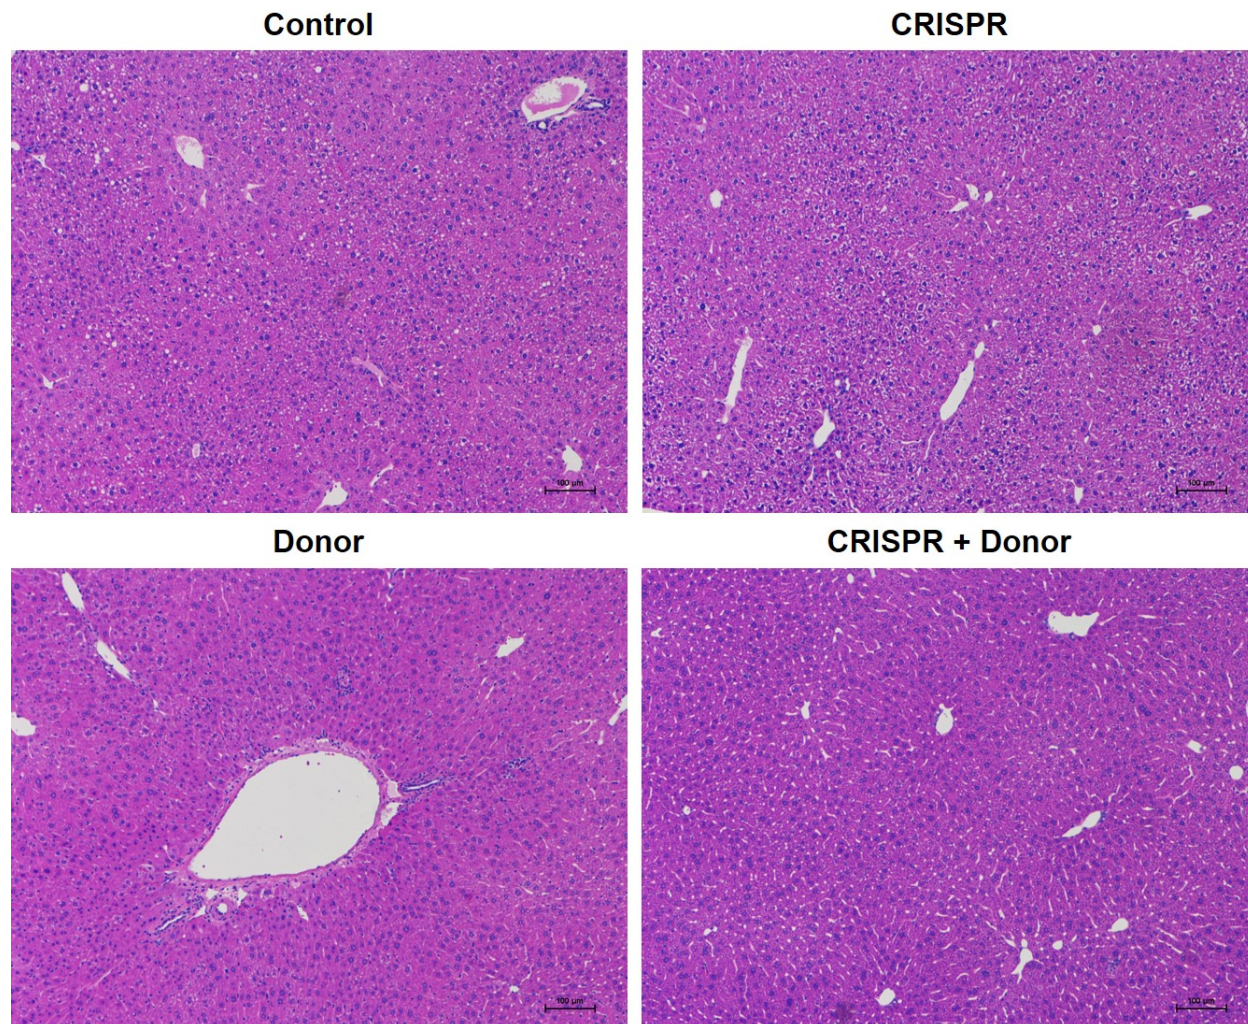

**Figure S7: No histopathological abnormalities in liver from *ApoA1*-targeted mice.** Representative H&E staining of livers from *ApoA1*-targeted mice. Scale bar is 100 μm.

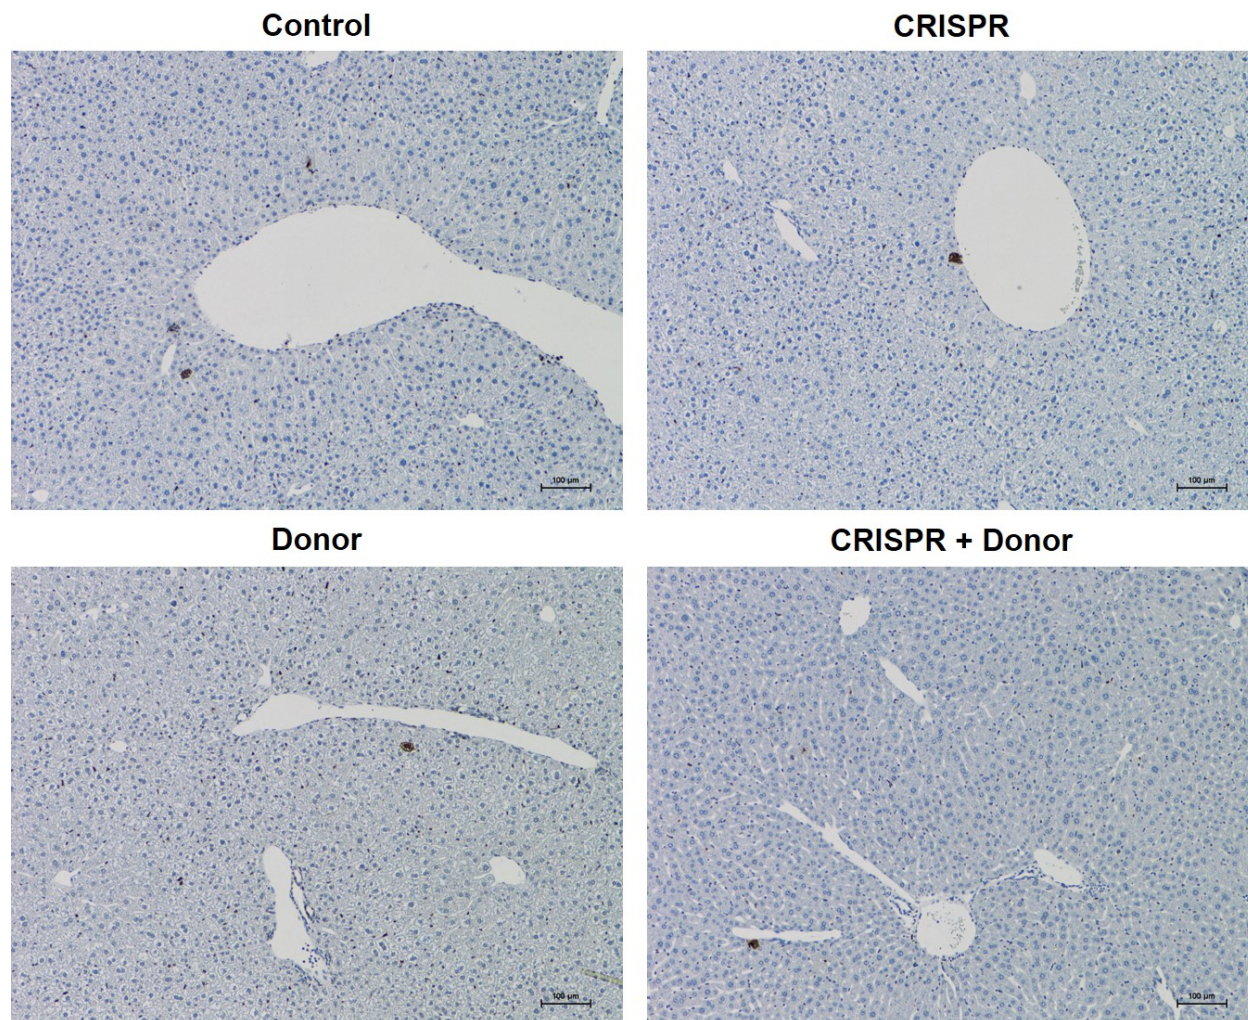

**Figure S8: Normal incidence of hepatocyte apoptosis in *ApoA1*-targeted mice.** Representative TUNEL staining of livers from *ApoA1*-targeted mice at 12 weeks post-injection. Scale bar is 100 μm.

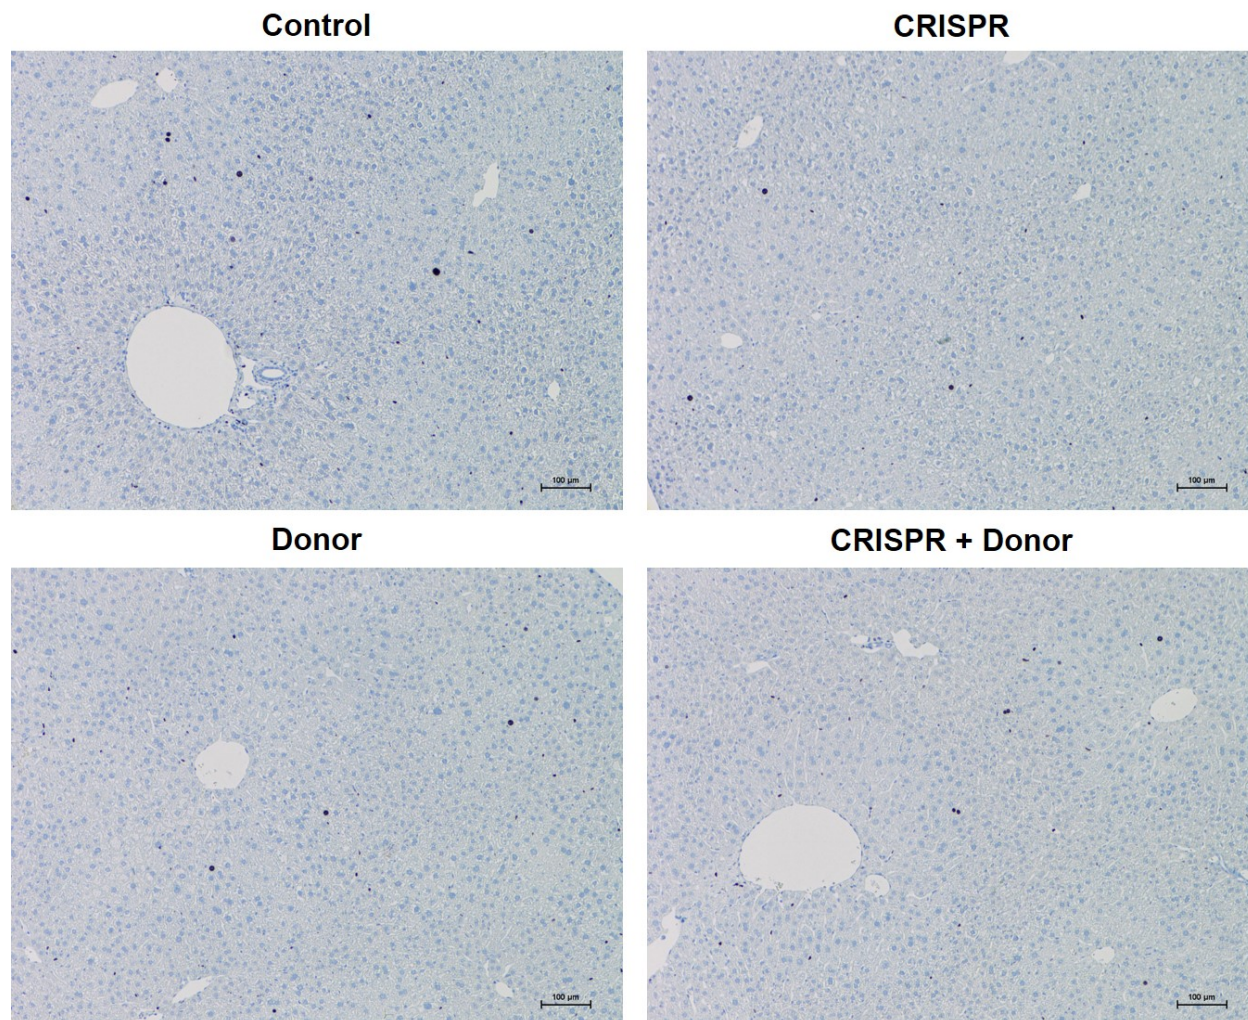

**Figure S9: Normal rates of proliferation in livers of *ApoA1*-targeted mice.** Representative Ki67 staining of livers from *ApoA1*-targeted mice. Scale bar is 100 μm.

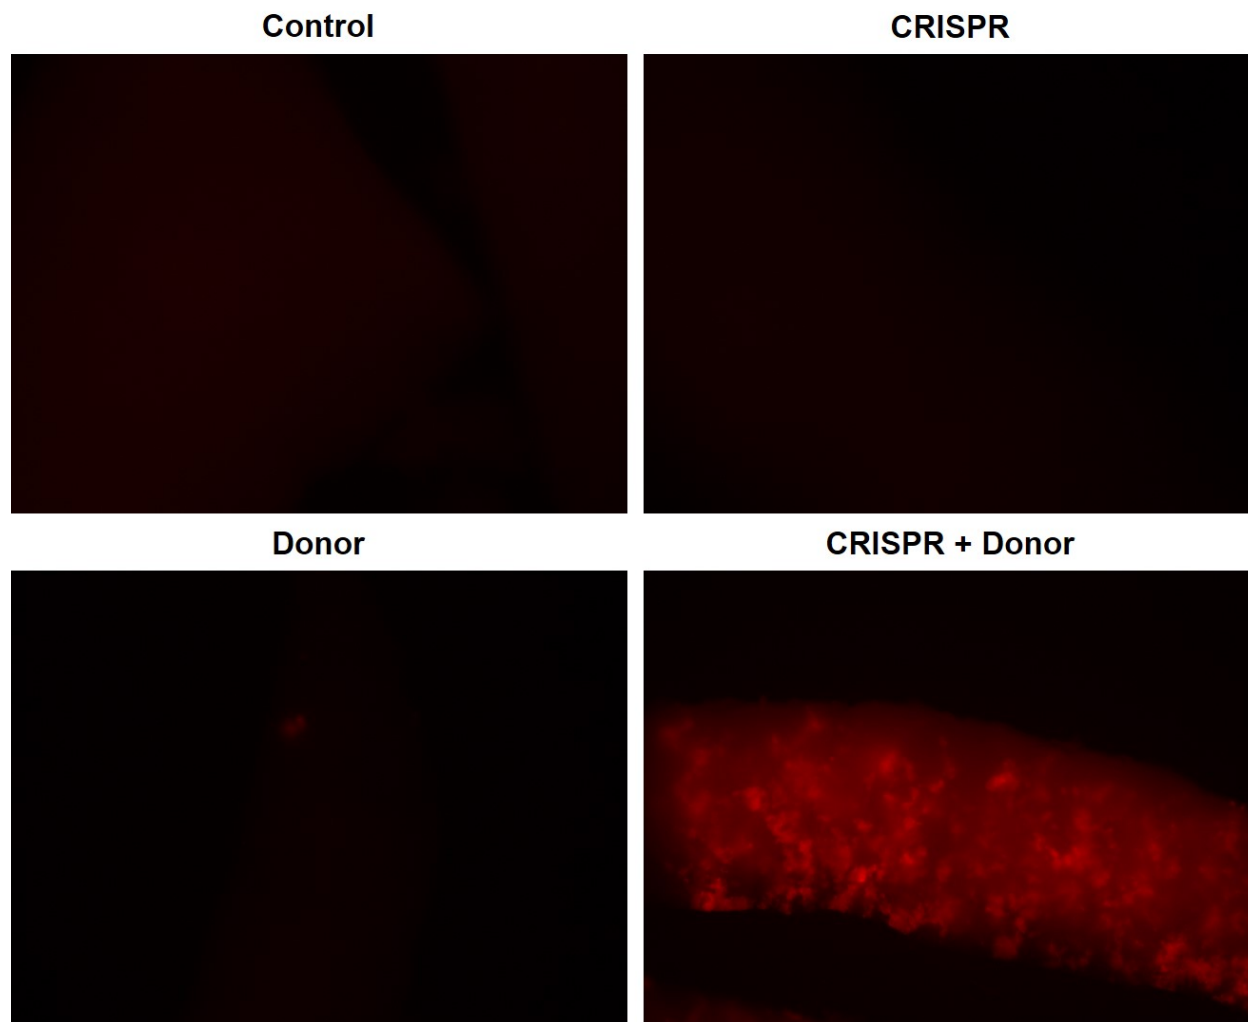

**Figure S10: Efficient expression of mKate2 in *Apoa1*-targeted mice injected at P4.** Direct mKate2 fluorescence in fresh liver slices from *Apoa1*-targeted mice. Representative images are shown. A 4x objective lens and 45 ms exposure time were used.



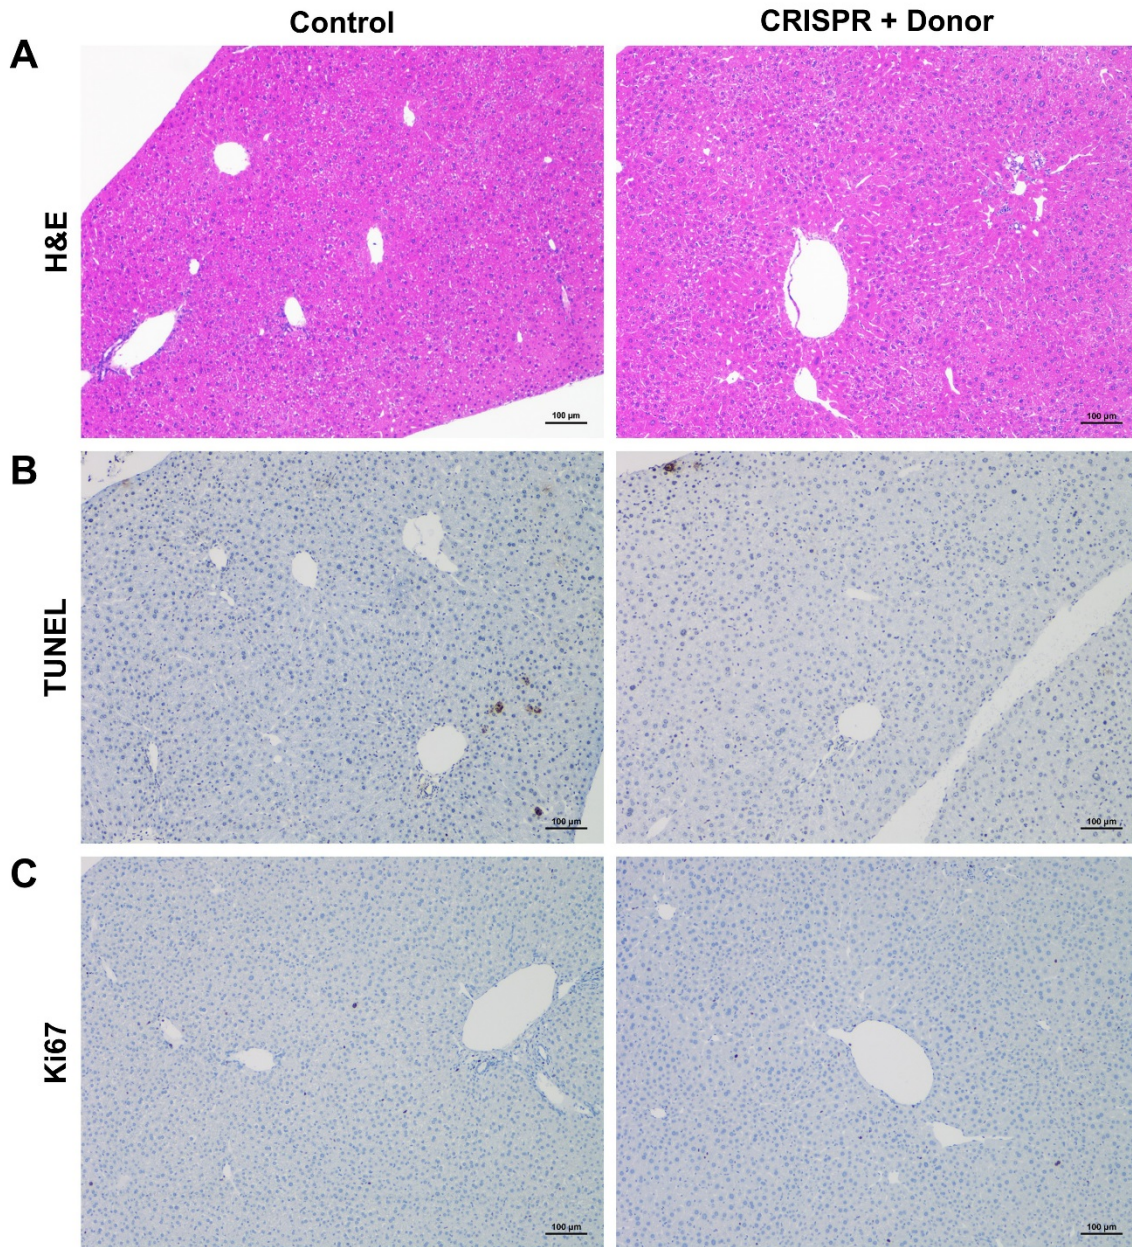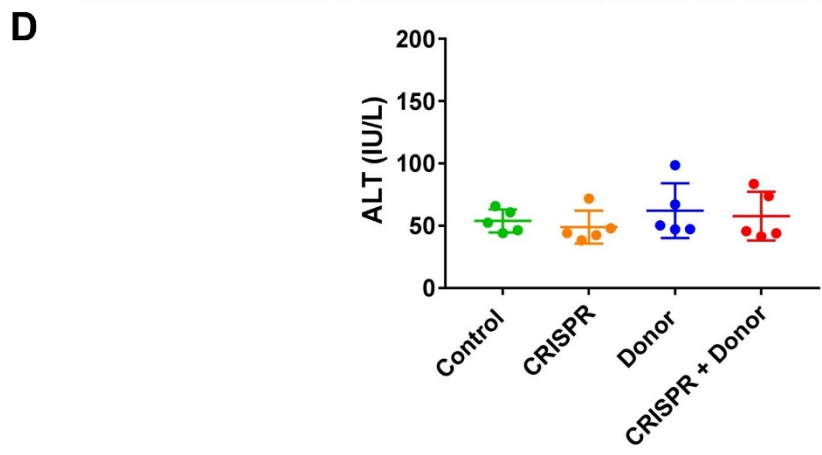

**Figure S11: No histopathological abnormalities or toxicity in liver from P4-injected *Apoa1*-targeted mice.** Representative (A) H&E, (B) TUNEL and (C) Ki67 staining of livers from *Apoa1*-targeted mice. Scale bar is 100  $\mu$ m. (D) ALT levels in plasma at endpoint. Data are shown as mean  $\pm$  standard deviation (n=5). A one-way ANOVA followed by Tukey test revealed no significant differences in ALT levels among groups.

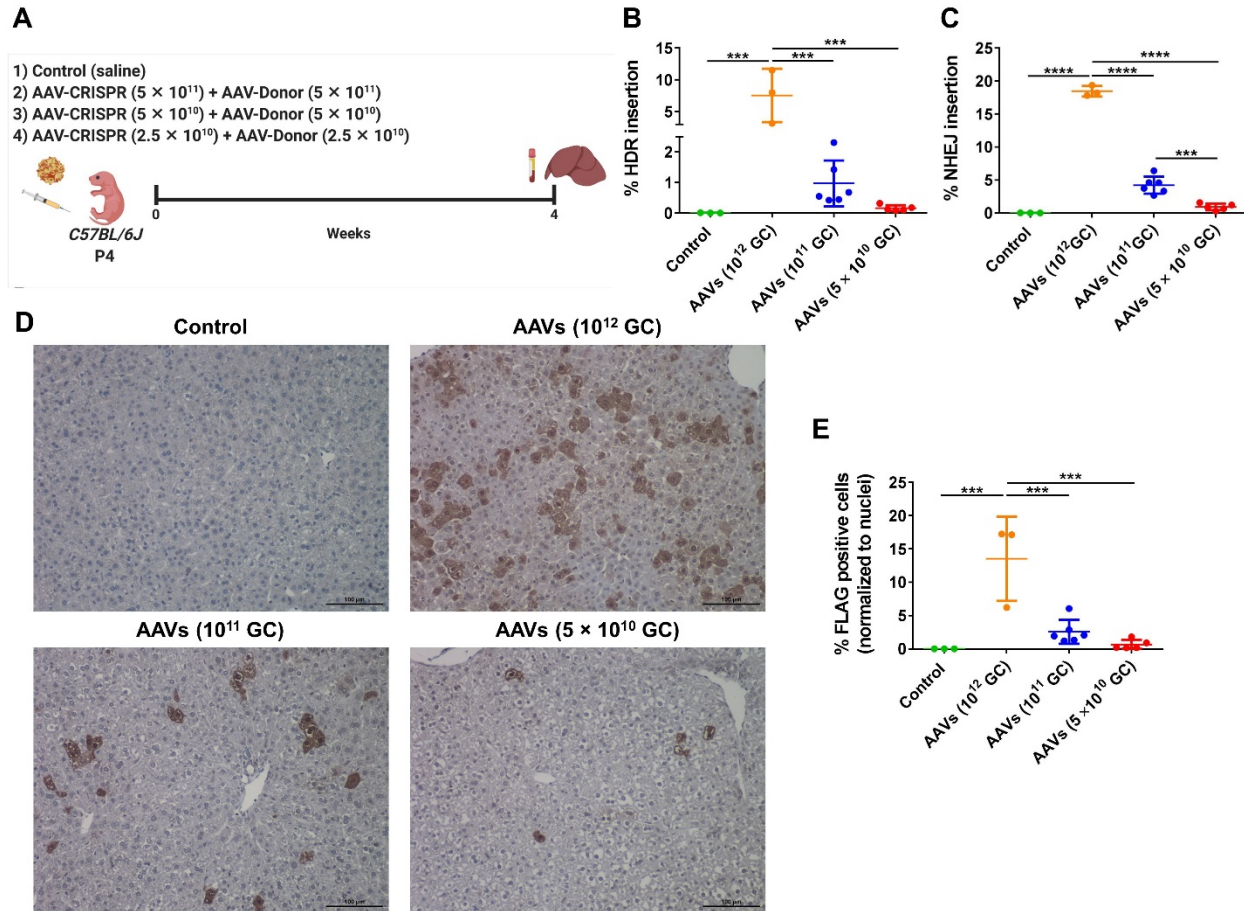

**Figure S12: Dose response study of *ApoA1* targeting in pups injected AAV-CRISPR + AAV-Donor.** (A) P4 *C57BL/6J* pups were subcutaneously injected with three doses of AAV-CRISPR and an AAV-Donor encoding mKate2 in a 1:1 molar ratio (total AAVs:  $10^{12}$ ,  $10^{11}$  or  $5 \times 10^{10}$  GC) or saline (control). Mice were sacrificed at 4 weeks of age and the liver was evaluated for the targeting at the *ApoA1* locus and the expression of mKate2. (B) Frequency of correct HDR targeting of AAV-Donor by ddPCR. (C) Frequency of *ApoA1* alleles with NHEJ insertions of AAV genomes by ddPCR. (D) Representative immunohistochemistry for mKate2-FLAG (brown cells) in *ApoA1*-targeted mice. Scale bar is 100  $\mu$ m. (E) Quantification of FLAG positive hepatocytes relative to total nuclei per field. Data are shown as mean  $\pm$  standard deviation (n=3 control mice, 3 mice injected with  $10^{12}$  GC, 6 mice injected with  $10^{11}$  GC and 5 mice injected with  $5 \times 10^{10}$  GC), with significance determined by One-way ANOVA followed by Tukey test. \*\*\* p<0.001, \*\*\*\* p<0.0001. (A) created with BioRender.

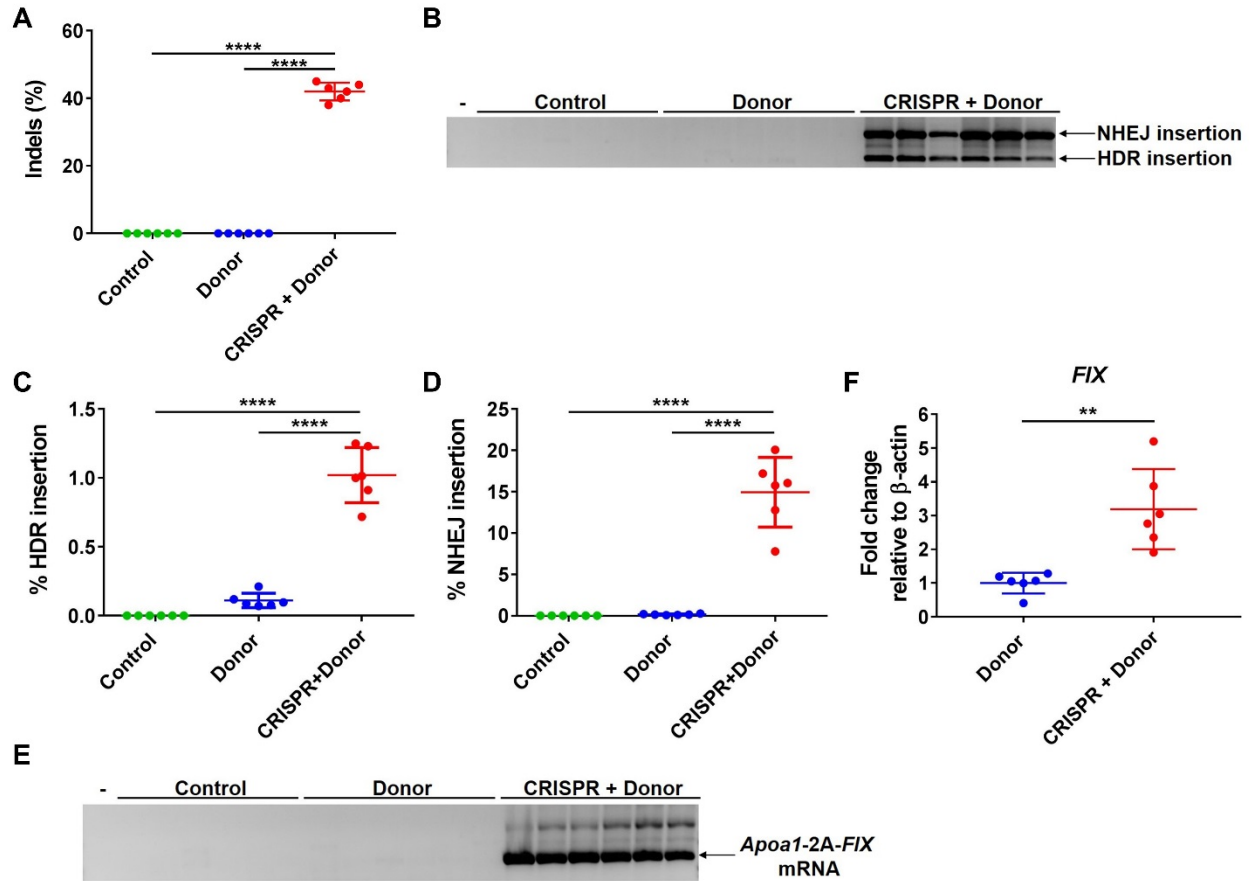

**Figure S13: Specific AAV-Donor integration in the 3'UTR of *ApoA1* in livers from C57BL/6J mice.** (A) Rate of indel formation in the 3'UTR of *ApoA1* by ICE analysis. (B) Integration PCR on liver DNA showed two main products corresponding to HDR (941 bp) and NHEJ (1866 bp) insertion of AAV-Donor in the *ApoA1* cut site. Minus (-) indicates a water only PCR control. (C) Frequency of HDR targeting of AAV-Donor by ddPCR. (D) Frequency of *ApoA1* alleles with NHEJ insertions of AAV genomes by ddPCR. (E) Detection of the bicistronic *ApoA1-2A-FIX* mRNA (724 bp) by end point PCR on cDNA. Minus (-) indicates a water only PCR control. (F) qPCR analysis of *FIX* expression in livers from Donor and CRISPR + Donor mice. qPCR data are expressed as fold change relative to  $\beta$ -Actin. Data are shown as mean  $\pm$  standard deviation (n=6). One-way ANOVA followed by Tukey test in panels A, C and D. Two-tailed Student's t-test in panel F. \*\*p<0.01, \*\*\*\* p<0.0001.

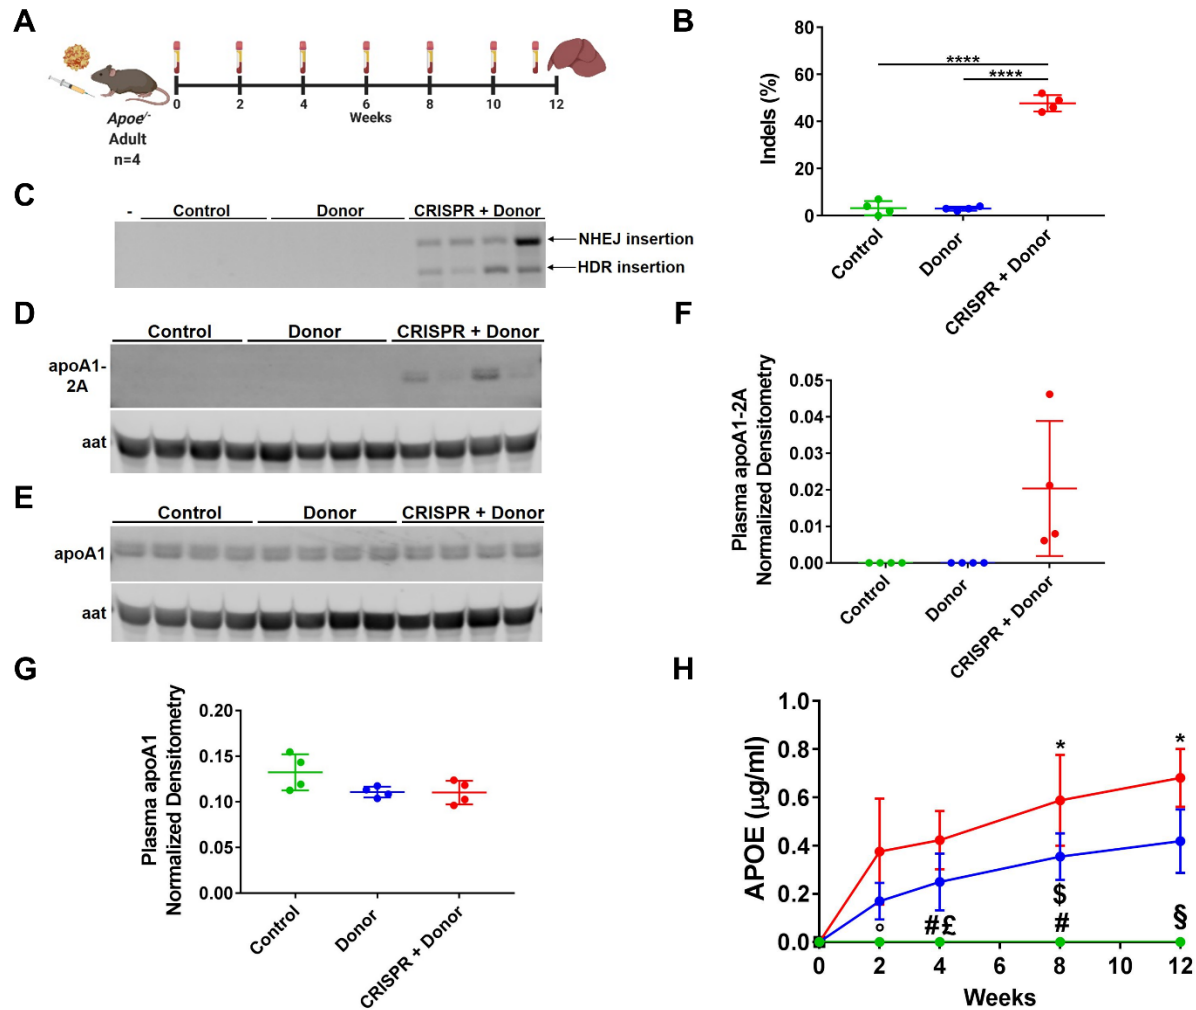

**Figure S14: Efficient expression of a secreted therapeutic protein from the *ApoA1* locus.** (A) Adult *Apoe*<sup>-/-</sup> mice were intraperitoneally injected with AAV-CRISPR ( $5 \times 10^{11}$  GC) and/or an AAV-Donor ( $5 \times 10^{11}$  GC) encoding the human *APOE* gene. Control mice were injected with AAV-GFP ( $5 \times 10^{11}$  GC). Plasma was collected every two weeks up to 12 weeks post-injection for analysis of human APOE protein. (B) Rate of indel formation in the 3'UTR of *ApoA1* by ICE analysis. (C) Integration PCR on liver DNA showed two main products corresponding to HDR (1289 bp) and NHEJ (2213 bp) insertion of AAV-Donor in the *ApoA1* cut site. Minus (-) indicates a water only PCR control. Western blot analysis of 2A-tagged apoA1 (D) and total apoA1 (E) in plasma isolated at 12 weeks post-injection, with aat as loading control. Densitometry analysis of apoA1-2A (F) and apoA1 (G) relative to aat loading control. (H) Quantitative measurement of plasma APOE over time by ELISA. Green line: control; Blue line: Donor; Red line: CRISPR + Donor mice. Data are shown as mean ± standard deviation (n=4). A one-way ANOVA followed by Tukey test was used for determining significance in panels B, F and G. A two-way ANOVA followed by Tukey test was used for determining significance in panel H. \*\*\*\* p < 0.0001, \* p < 0.05 CRISPR + Donor vs Donor, ° p < 0.001 Control vs CRISPR + Donor, # p < 0.0001 Control vs CRISPR + Donor, £ p < 0.05 Control vs Donor, \$ p < 0.001 Control vs Donor, § p < 0.0001 Control vs Donor and CRISPR + Donor. (A) created with BioRender.

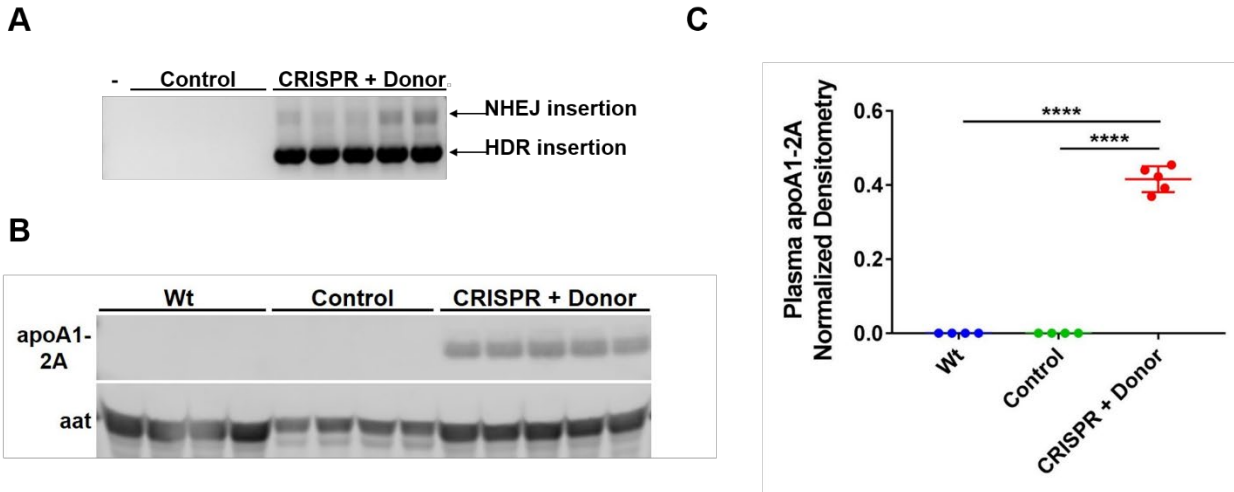

**Figure S15: Enrichment of HDR-mediated integrations of AAV-Donor in the *ApoA1* locus in livers from *Fah*<sup>-/-</sup> mice.** (A) Integration PCR on liver DNA showed mostly the HDR (886 bp) insertion rather than the NHEJ (1810 bp) insertion of AAV-Donor in the *ApoA1* cut site. Minus (-) indicates a water only PCR control. (B) Western blot analysis of 2A-tagged apoA1 in plasma isolated at endpoint, with aat as loading control. (C) Densitometry analysis of apoA1-2A relative to aat loading control. Wild type (Wt) indicates plasma samples from *C57BL/6J* mice as a control for physiological levels of aat. Control mice showed lower levels of plasma aat likely due to the severe liver damage. Data are shown as mean ± standard deviation (n=4 Wt and Control, 5 CRISPR + Donor). A one-way ANOVA followed by Tukey test was used for determining significance. \*\*\*\* p<0.0001.

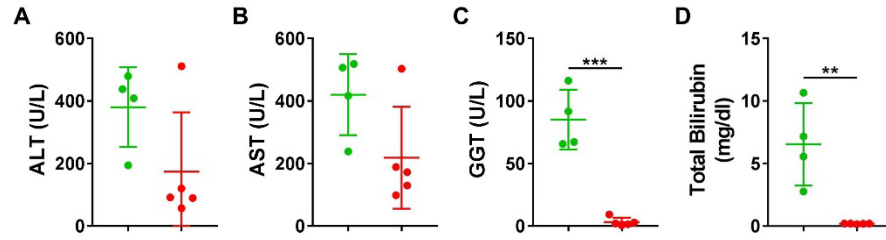

**Figure S16: Rescue of liver toxicity in *ApoA1*-targeted *Fah*<sup>-/-</sup> mice.** (A) ALT, (B) AST, (C) GGT and (D) total bilirubin levels in plasma of *ApoA1*-targeted mice. Green dots: control; Red dots: CRISPR + Donor mice. Data are shown as mean ± standard deviation (n=4 control and 5 CRISPR + Donor mice). \*\* p<0.01, \*\*\* p<0.001 by two-tailed Student's t-test.

**A**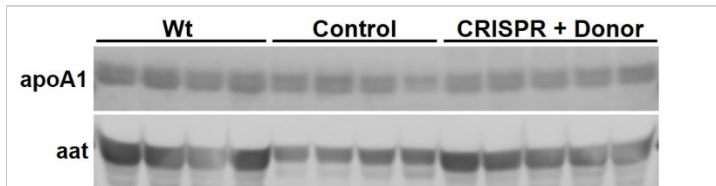**B**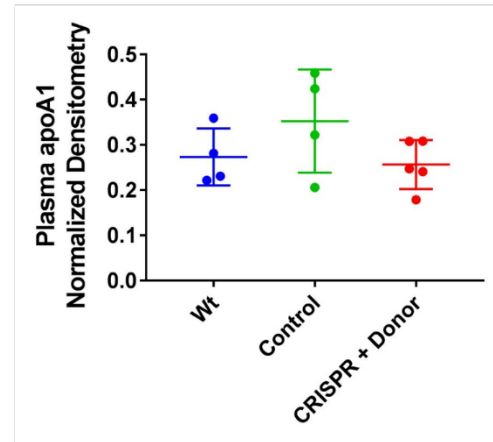

**Figure S17: High rates of *Apoa1* targeting does not impact endogenous apoA1 levels.** (A) Western blot analysis of total apoA1 in plasma isolated at endpoint, with aat as loading control. (B) Densitometry analysis of apoA1 relative to aat loading control. Wild type (Wt) indicates plasma samples from *C57BL/6J* mice as a control for physiological levels of apoA1 and aat. Control mice showed lower levels of plasma aat likely due to the severe liver damage. Data are shown as mean  $\pm$  standard deviation (n=4 Wt and Control, 5 CRISPR + Donor). A one-way ANOVA followed by Tukey test did not reveal significant differences in apoA1 levels among groups.



**Table S1: On- and off-target (OT) indel formation analysis by deep sequencing.**

Available as Excel File.

**Table S2: ChIP-seq and ATAC-seq details.**

| <b>NAME</b>              | <b>DESCRIPTION</b>  | <b>BIOSAMPLE_ DESCRIPTION</b>                                       | <b>GENOME</b> | <b>ANTIBODY</b>    | <b>EXPERIMENT_ ACCESSION</b> | <b>BIOSAMPLE_ ACCESSION</b> | <b>FILE_ ACCESSION</b>     | <b>FILE_ TYPE</b> | <b>PROCESSING_ PIPELINE</b> |
|--------------------------|---------------------|---------------------------------------------------------------------|---------------|--------------------|------------------------------|-----------------------------|----------------------------|-------------------|-----------------------------|
| MOUSE_ LIVER_ H3K27AC    | H3K27ac ChIP-seq    | 1 million hepatocytes extracted from 8 week old C57BL/6 mouse liver | mm10          | Abcam 4729         | NCBI GEO GSE152993           | N/A                         | N/A                        | FASTQ (SE)        | Aquas ChIP-seq              |
| MOUSE_ LIVER_ RNA_ POL2  | RNA Pol II ChIP-seq | Mus musculus strain B6NCrl male adult (8 weeks) liver tissue        | mm10          | Covance MMS-126R   | ENCODE ENCSR000 CBR          | ENCB S337E NC               | ENCFF0 01LNH               | FASTQ (SE)        | Aquas ChIP-seq              |
| MOUSE_ LIVER_ ATAC       | ATAC-seq            | Liver from pooled postnatal 0 day mice                              | mm10          | N/A                | ENCODE ENCSR609 OHJ          | ENCB S559 AAA               | ENCFF9 57VLH, ENCFF9 99IJT | FASTQ (PE)        | RIESLING                    |
| HUMAN_ LIVER_ H3K27AC    | H3K27ac ChIP-seq    | Homo sapiens female adult (53 years) right lobe of liver tissue     | hg38          | Active Motif 39133 | ENCODE ENCSR981 UJA          | ENCB S536T HV               | ENCFF9 31EZZ               | FASTQ (SE)        | Aquas ChIP-seq              |
| HUMAN_ LIVER_ RNA_ POL 2 | RNA Pol II ChIP-seq | Homo sapiens right lobe of liver female adult (53 years)            | hg38          | Biologend 920102   | ENCODE ENCSR415 MOW          | ENCB S904 HZU               | ENCFF1 74GER, ENCFF0 71CTT | FASTQ (PE)        | Aquas ChIP-seq              |
| HUMAN_ LIVER_ ATAC       | ATAC-seq            | Homo sapiens right lobe of liver female adult (53 years)            | hg38          | N/A                | ENCODE ENCSR373 TDL          | ENCB S904 HZU               | ENCFF0 35UUL, ENCFF2 59ZLS | FASTQ (PE)        | RIESLING                    |

**Table S3: Primer list.**

| <b>Name</b>  | <b>Sequence (5' to 3')</b>                  | <b>Purpose</b>                  |
|--------------|---------------------------------------------|---------------------------------|
| WRL_0066     | GTACTACGAGGAAACCGGGAAC                      | AAV titer SaCas9 Fw             |
| WRL_0068     | GTTGTTGTAGAAGGAGGCGATAAAC                   | AAV titer SaCas9 Rv             |
| WRL_0200     | CACATGGGAGAGAGTCACCACATAC                   | AAV titer mKate2 Fw             |
| WRL_0201     | CCACGAGCTTCAGGGCCATG                        | AAV titer mKate2 Rv             |
| EYFP_For2    | GCATCGACTTCAAGGAGGAC                        | AAV titer EGFP Fw               |
| EGFP_Rev2    | TGCACGCTGCCGTCCTCGATG                       | AAV titer EGFP Rv               |
| MDG_0046     | GGTCGCTTTTGGGATTACCT                        | AAV titer <i>APOE</i> Fw        |
| MDG_0047     | TTCCTCCAGTTCCGATTTGT                        | AAV titer <i>APOE</i> Rv        |
| MDG_0054     | ATGCATTCTGTGGAGGCTCT                        | AAV titer <i>FIX</i> Fw         |
| MDG_0056     | GCTGATCTCCCTTTGTGGAAG                       | AAV titer <i>FIX</i> Rv         |
| WRL_0397:    | CCACTCTGTCAACGGCTGCAAC                      | AAV titer <i>FAH</i> Fw         |
| SynPARRevSeq | CACACAAAAAACCAACACACAGATCTAATG              | AAV titer <i>FAH</i> Rv         |
| MDG_0040     | TGAGTGCCAAATCCCTTTTC                        | Integration PCR <i>Apoa1</i> Fw |
| WRL_0047     | GCCCTCGACCGCCTTGATTC                        | Integration PCR mKate2 Rv       |
| MDG_0047     | TTCCTCCAGTTCCGATTTGT                        | Integration PCR <i>APOE</i> Rv  |
| MDG_0168     | GGCTCCGCTTCTCTAGACT                         | Integration PCR 2A Rv           |
| MDG_0098     | TCTACAGTCCGACGATCAACCCACCTGAAGACACTTGG      | <i>Apoa1</i> deep seq Fw        |
| MDG_0099     | GACGTGTGCTCTTCCGATCTGTTCTCACGTCCCTTGATG     | <i>Apoa1</i> deep seq Rv        |
| MDG_0100     | TCTACAGTCCGACGATCACTCCCCATCATATACACTTCC     | OT1 deep seq Fw                 |
| MDG_0101     | GACGTGTGCTCTTCCGATCGACAGGTACCCAAACAGACCTT   | OT1 deep seq Rv                 |
| MDG_0102     | TCTACAGTCCGACGATCAGGAGTGCATCCGTTATGGAG      | OT2 deep seq Fw                 |
| MDG_0103     | GACGTGTGCTCTTCCGATCTGCACATGAGAGCACTTGAA     | OT2 deep seq Rv                 |
| MDG_0104     | TCTACAGTCCGACGATCACTTGGGAGAGGTGACCAGAC      | OT3 deep seq Fw                 |
| MDG_0105     | GACGTGTGCTCTTCCGATCTCTAACAGGCATCGGACCTT     | OT3 deep seq Rv                 |
| MDG_0106     | TCTACAGTCCGACGATCACTATGGGGTGGCTGCTCTTA      | OT4 deep seq Fw                 |
| MDG_0107     | GACGTGTGCTCTTCCGATCTGAGGTTAATTGGGGTTCCA     | OT4 deep seq Rv                 |
| MDG_0108     | TCTACAGTCCGACGATCAAGGGTAACATGGGTGGTGAA      | OT5 deep seq Fw                 |
| MDG_0109     | GACGTGTGCTCTTCCGATCCCGATCTGCAATCTGACTA      | OT5 deep seq Rv                 |
| MDG_0110     | TCTACAGTCCGACGATCATGTGCATGCTGAGTGAATGA      | OT6 deep seq Fw                 |
| MDG_0111     | GACGTGTGCTCTTCCGATCGGAGCCAGCTATTCTGCAAC     | OT6 deep seq Rv                 |
| MDG_0112     | TCTACAGTCCGACGATCAACAAGTAAAAATCAGTGAAGACCT  | OT7 deep seq Fw                 |
| MDG_0113     | GACGTGTGCTCTTCCGATCTGCTAGAAACTGTCATGAGAGGAC | OT7 deep seq Rv                 |
| MDG_0114     | TCTACAGTCCGACGATCACCAGAGAGAAGGAGGGAATCTT    | OT8 deep seq Fw                 |
| MDG_0115     | GACGTGTGCTCTTCCGATCCGATGGAACCTTTTAGACAAC    | OT8 deep seq Rv                 |
| MDG_0118     | TCTACAGTCCGACGATCATCAACTACACTTTGGTTCTTCT    | OT10 deep seq Fw                |
| MDG_0119     | GACGTGTGCTCTTCCGATCAAATGAAAACCATCGAGGAAGA   | OT10 deep seq Rv                |
| MDG_0120     | TCTACAGTCCGACGATCATTGCTGAGTCATTTCTCTGTTG    | OT11 deep seq Fw                |
| MDG_0121     | GACGTGTGCTCTTCCGATCGCATTGAGGATCTTTTGC       | OT11 deep seq Rv                |
| MDG_0122     | TCTACAGTCCGACGATCACACCTGATCAGCAACAAAGTGT    | OT12 deep seq Fw                |
| MDG_0123     | GACGTGTGCTCTTCCGATCGCTCACTCTGTTTCTCCTCAAC   | OT12 deep seq Rv                |
| MDG_0126     | TCTACAGTCCGACGATCAACCTTCTGCTAGCCTCCTTTCT    | OT14 deep seq Fw                |
| MDG_0127     | GACGTGTGCTCTTCCGATCTATCGAGTGGTCCAATCTTGTG   | OT14 deep seq Rv                |
| MDG_0128     | TCTACAGTCCGACGATCACATTTGCGTGCATACCTGTAGT    | OT15 deep seq Fw                |
| MDG_0129     | GACGTGTGCTCTTCCGATCTAAGCAAAAACAAGCCAGATTCA  | OT15 deep seq Rv                |
| P5_1         | CTGATCGT                                    | Deep seq P5 barcode Fw          |
| P5_2         | ACTCTCGA                                    | Deep seq P5 barcode Fw          |
| P5_3         | TGAGCTAG                                    | Deep seq P5 barcode Fw          |
| P5_4         | GAGACGAT                                    | Deep seq P5 barcode Fw          |
| P5_5         | CTTGTCGA                                    | Deep seq P5 barcode Fw          |
| P7_1         | CACTCACG                                    | Deep seq P7 barcode Rv          |
| P7_2         | ACACGATC                                    | Deep seq P7 barcode Rv          |

|             |                       |                                |
|-------------|-----------------------|--------------------------------|
| P7_3        | TATCTGAC              | Deep seq P7 barcode Rv         |
| P7_4        | CACGTCGT              | Deep seq P7 barcode Rv         |
| P7_5        | TAGCGACG              | Deep seq P7 barcode Rv         |
| P7_6        | AGCTCTAG              | Deep seq P7 barcode Rv         |
| P7_7        | ACTAGAGC              | Deep seq P7 barcode Rv         |
| P7_8        | CGTACGCA              | Deep seq P7 barcode Rv         |
| P7_9        | CTACACTA              | Deep seq P7 barcode Rv         |
| P7_10       | TGCTGCTT              | Deep seq P7 barcode Rv         |
| P7_11       | TCACGCGT              | Deep seq P7 barcode Rv         |
| P7_12       | GTAGATCG              | Deep seq P7 barcode Rv         |
| P7_13       | GTGACGCA              | Deep seq P7 barcode Rv         |
| P7_14       | CATACTAG              | Deep seq P7 barcode Rv         |
| P7_15       | AGTGTAGA              | Deep seq P7 barcode Rv         |
| P7_16       | CGAGAGTT              | Deep seq P7 barcode Rv         |
| P7_17       | GACATAGT              | Deep seq P7 barcode Rv         |
| P7_18       | ACGCTACT              | Deep seq P7 barcode Rv         |
| P7_19       | ACTCACTG              | Deep seq P7 barcode Rv         |
| P7_20       | TGAGTACG              | Deep seq P7 barcode Rv         |
| MDG_025a    | AAACAGAAGGTGCAGCCCTA  | <i>Apo1</i> ICE Fw             |
| MDG_025b    | CTCGGCTAGCACAAGAAACC  | <i>Apo1</i> ICE Rv             |
| MDG_0150    | AGGGAAGGCAGTGAGTTAGA  | ddPCR HDR and ddPCR NHEJ Fw    |
| MDG_0202    | CGGGATTCTCTTCGACATCC  | ddPCR HDR Rv                   |
| MDG_0162    | AGCGCGCGCCAGAAGCTGCA  | ddPCR HDR and ddPCR NHEJ probe |
| MDG_0151    | GATAAGTAGCATGGCGGGTT  | ddPCR NHEJ Rv                  |
| MDG_0158    | GCTGAGCTTATCAGTCTCCC  | ddPCR Ref Fw                   |
| MDG_0159    | GAAGGCACCAAGAACACAGA  | ddPCR Ref Rv                   |
| MDG_0163    | AGCCCAGCCCCTGCCACACA  | ddPCR Ref probe                |
| MDG_0130    | TATGTGGATGCGGTCAAAGA  | <i>Apo1</i> qPCR Fw            |
| MDG_0131    | ACGGTTGAACCCAGAGTGTC  | <i>Apo1</i> qPCR Rv            |
| MDG_0132    | TACAGGGCTACATGGAACAA  | <i>Apoc3</i> qPCR Fw           |
| MDG_0133    | TCGGACTCCTGCACGCTACTT | <i>Apoc3</i> qPCR Rv           |
| MDG_0134    | ACCCAGCTAAGCAACAATGC  | <i>Apoa4</i> qPCR Fw           |
| MDG_0135    | TAGCATCCCCAAGTTTGTCC  | <i>Apoa4</i> qPCR Rv           |
| MDG_0136    | GGCTGCAGTCATCACTTGG   | <i>Apoa5</i> qPCR Fw           |
| MDG_0137    | GGCTGAAGTAGTCCCAGAGG  | <i>Apoa5</i> qPCR Rv           |
| MDG_0138    | GACTCTGCCACCACAAGGAT  | <i>Zpr1</i> qPCR Fw            |
| MDG_0139    | ACGGCTGATGAGTCCTTCAA  | <i>Zpr1</i> qPCR Rv            |
| MDG_0140    | GCAAAGGCTCATTTTGAAGC  | <i>Bud13</i> qPCR Fw           |
| MDG_0141    | CTGAATCAGAGGCTTTTTGG  | <i>Bud13</i> qPCR Rv           |
| MDG_0142    | GCTAGCGGAGGGGAGATATT  | <i>Sik3</i> qPCR Fw            |
| MDG_0143    | TTTGAACTTCCGTGAGCTT   | <i>Sik3</i> qPCR Rv            |
| mActb RT F1 | TTGGGTATGGAATCCTGTGG  | <i>Bact</i> qPCR Fw            |
| mActb RT R1 | CTTCTGCATCCTGTCAGCAA  | <i>Bact</i> qPCR Rv            |
| MDG_0203    | ATTTGCTAATGTGTATGTG   | bicistronic mRNA PCR Fw        |
| MDG_0204    | TTCAACAGGGAGAAGTTAGT  | bicistronic mRNA PCR Rv        |
| MDG_0230    | TCACTCAAAGCACCCAATCA  | <i>FLX</i> qPCR Fw             |
| MDG_0231    | GGGCAGCAGTTACAATCCAT  | <i>FLX</i> qPCR Rv             |
